# Supplementary material for: Structure of the germline genome of Tetrahymena thermophila and relationship to the massively rearranged somatic genome
Source: eLife. 2016 Nov 28;5:e19090. doi: 10.7554/eLife.19090 (PMC5182062; doi:10.7554/eLife.19090)
Supplement: Figure 6—source data 2. — Detailed metrics for each putative TE contribution to Tetrahymena MIC chromosomes super-assemblies, such as numbers of fragments, total amount, average divergence to consensus (proxy for age), etc. Obtained by parsing the RepeatMasker output (.out file), using https://github.com/4ureliek/Parsing-RepeatMasker-Outputs/blob/master/parseRM_simple.pl. DOI: http://dx.doi.org/10.7554/eLife.19090.019 [file elife-19090-fig6-data2.xls]

## Sheet: Figure 6-source data 2
Figure 6-source data 2. Details of putative TEs contribution to the MIC chromosome super-assemblies
Parsed repeat masker output of the mic chromosomes (with https://github.com/4ureliek/Parsing-RepeatMasker-Outputs/blob/master/parseRM_simple.pl)
#Footnotes:
#(1) This column "Number_of_fragments_start_to_end" gives the number of masked copies that start and end at the beginning and end of the consensus sequence, respectively (note that there could be internal deletions)
#(2) This column "Number_of_fragments_corrected" corrects the number of masked fragments if they are detected as being fragments of the same repeat by Repeat Masker ("interrupted repeats"). Note that this number is a more accurate count for copies, but is still likely overestimated.
#The columns average_of_XXX and median_of_XXX give an idea of how all the fragments are similar to the consensus sequence (gives an idea of the age of the family)
#The columns "overlapping_basepairs" reflect the fact that with repeat masker, there may be overlapping maskings. Here the values correspond to overlaps between the same consensus sequence, but this can happen between different repeats. This is why the sum of all %_of_the_genome_masked here is higher than the value in Supplementary Table 15 (and in main text)
#Repeat_name	Repeat_class	Repeat_family	class/family	Repeat_fullname	Consensus_length	Number_of_fragments	Number_of_fragments_start_to_end(1)	Number_of_fragments_corrected(2)	average_of_%div	median_of_%divergence	average_of_%del	median_of_%deletions	average_of_%insertions	median_of_%insertions	total_basepair_masked	average_bp_per_fragment	median_bp_per_fragment	%_of_the_genome_masked	overlapping_masked_basepairs	%_of_overlapping_basepairs_(GENOME)
Contig[0002].chkTE	DNA	TcMar	DNA/TcMar	Contig[0002].chkTE#DNA/TcMar	289	9	2	9	10.3527	1.7	1.23606	0	1.19622	0	2934	326	289	0.00193705
Contig[0003]	DNA	TcMar	DNA/TcMar	Contig[0003]#DNA/TcMar	178	8	7	8	0.793314	0.6	0.494523	0	0	0	1406	175.75	178	0.000928251
Contig[0004].C	DNA	ISXO2TnP	DNA/ISXO2TnP	Contig[0004].C#DNA/ISXO2TnP	1199	37	2	35	13.5747	17.6	1.76216	0.6	1.15006	1	10818	292.378	208	0.00714212
Contig[0005]	unclass	unclass	unclass/unclass	Contig[0005]#unclass/unclass	199	26	8	26	2.61188	0	0.575414	0	0.272767	0	4344	167.077	172	0.00286794
Contig[0008].H	DNA	piggyBac	DNA/piggyBac	Contig[0008].H#DNA/piggyBac	517	8	0	8	25.1921	25	4.02808	3.5	4.22397	4.25	1727	215.875	158	0.00114018
Contig[0009]	DNA	TcMar	DNA/TcMar	Contig[0009]#DNA/TcMar	821	41	5	36	20.7325	28.5	2.99724	3.6	2.80963	2.7	19751	481.732	320	0.0130397
Contig[0011].chkTE	unclass	unclass	unclass/unclass	Contig[0011].chkTE#unclass/unclass	315	16	6	16	4.0019	3.55	3.27237	0.15	0.97749	0.7	3634	227.125	220.5	0.00239919
Contig[0013]	DNA	Merlin	DNA/Merlin	Contig[0013]#DNA/Merlin	733	6	2	6	11.1571	20.65	1.43569	1.9	0.845338	2.6	3110	518.333	423	0.00205324
Contig[0014]	DNA	hAT-Ac	DNA/hAT-Ac	Contig[0014]#DNA/hAT-Ac	1829	17	3	16	3.71931	1	0.641019	0	0.565463	0	13128	772.235	282	0.0086672
Contig[0015]	unclass	unclass	unclass/unclass	Contig[0015]#unclass/unclass	142	20	7	20	11.7165	18.85	2.24005	2.15	2.54333	1.8	2412	120.6	122.5	0.00159242
Contig[0016]	unclass	unclass	unclass/unclass	Contig[0016]#unclass/unclass	519	12	7	12	7.86772	4.75	1.72065	0.55	0.731634	0.95	7318	609.833	755.5	0.00483139
Contig[0017]	DNA	TcMar	DNA/TcMar	Contig[0017]#DNA/TcMar	596	34	5	34	20.4544	30.25	2.32823	1.1	1.5239	1.35	8612	253.294	219.5	0.0056857
Contig[0018]	unclass	unclass	unclass/unclass	Contig[0018]#unclass/unclass	140	6	5	6	0.699166	0.7	0	0	0	0	839	139.833	140	0.000553914
Contig[0020]	unclass	unclass	unclass/unclass	Contig[0020]#unclass/unclass	2242	19	4	17	8.61412	21.3	1.20784	0	1.39146	0	13960	734.737	341	0.00921649
Contig[0021].fam1.2TIR.C	DNA	hAT-hobo	DNA/hAT-hobo	Contig[0021].fam1.2TIR.C#DNA/hAT-hobo	2731	36	1	33	4.27284	4.4	0.92072	0.25	0.603355	0.5	25367	704.639	274.5	0.0167475	33	2.18e-05
Contig[0022].chkTE	unclass	unclass	unclass/unclass	Contig[0022].chkTE#unclass/unclass	275	10	4	10	1.43354	0.7	0.205908	0	0.098877	0	2048	204.8	221	0.0013521
Contig[0023].H	DNA	hAT-hobo	DNA/hAT-hobo	Contig[0023].H#DNA/hAT-hobo	749	30	4	30	14.9725	24.35	2.8417	3.35	2.65507	4.05	7781	259.367	199	0.00513707
Contig[0024].chkTE	unclass	unclass	unclass/unclass	Contig[0024].chkTE#unclass/unclass	418	38	2	34	18.0974	21.45	4.74344	1.6	2.65702	3.85	8832	232.421	237.5	0.00583095
Contig[0025].H	DNA	TcMar	DNA/TcMar	Contig[0025].H#DNA/TcMar	584	43	4	42	21.01	26.6	2.59626	2.2	2.47828	2.9	8953	208.209	135	0.00591083
Contig[0026].P	LINE	L1	LINE/L1	Contig[0026].P#LINE/L1	3750	53	0	37	18.713	25.5	2.68986	2.8	2.38349	2.5	46602	879.283	504	0.030767	62	4.09e-05
Contig[0027]	unclass	unclass	unclass/unclass	Contig[0027]#unclass/unclass	371	2	0	2	10.7912	12.1	0.169912	0.2	0.722124	0.85	565	282.5	282.5	0.000373017
Contig[0028].fam3.2TIR.C	DNA	hAT-Ac	DNA/hAT-Ac	Contig[0028].fam3.2TIR.C#DNA/hAT-Ac	2776	32	1	26	18.3666	27.5	2.46613	6.35	4.22469	4.05	8603	268.844	137.5	0.00567976
Contig[0030]	DNA	MuDR	DNA/MuDR	Contig[0030]#DNA/MuDR	587	13	3	9	5.10375	6.1	1.45096	0.5	0.501392	0.3	4670	359.231	462	0.00308317
Contig[0031]	unclass	unclass	unclass/unclass	Contig[0031]#unclass/unclass	411	53	4	52	4.94422	0	0.704771	0	0.438891	0	7503	141.566	122	0.00495353
Contig[0033]	DNA	Merlin	DNA/Merlin	Contig[0033]#DNA/Merlin	1030	25	3	25	12.6334	29	1.60186	2.3	1.75109	1.5	7672	306.88	137	0.00506511	14	9.24e-06
Contig[0034].H.DDE.notMAC	DNA	piggyBac	DNA/piggyBac	Contig[0034].H.DDE.notMAC#DNA/piggyBac	2047	46	4	41	17.5267	28.1	2.17455	2.65	2.39814	2.9	19879	432.152	225.5	0.0131243
Contig[0035]	unclass	unclass	unclass/unclass	Contig[0035]#unclass/unclass	340	13	2	13	7.93752	4.2	1.18017	0	0.711082	0	3041	233.923	211	0.00200769
Contig[0036].check-RbCR1-7_SP	unclass	unclass	unclass/unclass	Contig[0036].check-RbCR1-7_SP#unclass/unclass	446	23	5	23	10.2248	9.8	1.99339	0	0.494752	1.3	6402	278.348	297	0.00422665
Contig[0037].H	DNA	TcMar	DNA/TcMar	Contig[0037].H#DNA/TcMar	318	48	4	48	16.1935	23.65	1.40023	0.55	1.64195	0.3	6019	125.396	85.5	0.00397379
Contig[0038].H	DNA	TcMar	DNA/TcMar	Contig[0038].H#DNA/TcMar	559	31	6	31	16.7638	26.4	2.66836	2.4	2.22386	2.9	8912	287.484	212	0.00588377
Contig[0039].H	DNA	TcMar	DNA/TcMar	Contig[0039].H#DNA/TcMar	1102	44	5	42	16.6751	26.9	1.84109	1.45	1.48827	1.15	17388	395.182	288.5	0.0114797
Contig[0040].fam10.2TIR.C.DDE	DNA	TcMar-pogo	DNA/TcMar-pogo	Contig[0040].fam10.2TIR.C.DDE#DNA/TcMar-pogo	1657	19	1	17	8.72462	17.1	1.13341	1.9	1.14741	1.3	9706	510.842	172	0.00640797
Contig[0041]	unclass	unclass	unclass/unclass	Contig[0041]#unclass/unclass	133	11	6	11	3.54533	0.8	0.309269	0	0.229458	0	1273	115.727	133	0.000840444
Contig[0042]	unclass	unclass	unclass/unclass	Contig[0042]#unclass/unclass	164	5	4	5	0.251985	0	0	0	0	0	781	156.2	164	0.000515622
Contig[0043].H	DNA	TcMar	DNA/TcMar	Contig[0043].H#DNA/TcMar	550	13	2	13	8.93224	12.8	1.0142	1.5	0.887996	0	4057	312.077	238	0.00267846
Contig[0044].chkTE	unclass	unclass	unclass/unclass	Contig[0044].chkTE#unclass/unclass	479	6	4	6	1.71858	1.6	0.203176	0	0.247901	0.1	2739	456.5	478	0.00180831
Contig[0045]	unclass	unclass	unclass/unclass	Contig[0045]#unclass/unclass	144	5	4	5	1.11429	0	0.162857	0	0	0	630	126	144	0.00041593
Contig[0047]	unclass	unclass	unclass/unclass	Contig[0047]#unclass/unclass	291	7	4	6	1.15576	0.8	0.971056	0	0	0	1458	208.286	286	0.000962582
Contig[0048]	unclass	unclass	unclass/unclass	Contig[0048]#unclass/unclass	125	59	9	59	9.32194	10.4	0.918956	3.8	3.67159	0	6399	108.458	109	0.00422466
Contig[0050]	unclass	unclass	unclass/unclass	Contig[0050]#unclass/unclass	194	7	4	7	0	0	0	0	0	0	1171	167.286	194	0.000773102
Contig[0051]	unclass	unclass	unclass/unclass	Contig[0051]#unclass/unclass	626	28	3	25	9.55479	12.75	3.1426	1.05	1.73155	0.2	6896	246.286	145	0.00455279	41	2.71e-05
Contig[0052].TSD	DNA	TcMar	DNA/TcMar	Contig[0052].TSD#DNA/TcMar	289	5	2	5	5.27411	3.5	0.0583182	0.2	1.32619	0	1653	330.6	297	0.00109132
Contig[0057]	DNA	TcMar	DNA/TcMar	Contig[0057]#DNA/TcMar	305	8	0	4	18.5428	14.6	3.33125	2.6	2.43264	1.7	1725	215.625	200.5	0.00113886
Contig[0058]	DNA	TcMar	DNA/TcMar	Contig[0058]#DNA/TcMar	418	10	6	10	3.6419	3.4	0.616875	0.25	0.370511	0.1	3520	352	412	0.00232393
Contig[0060]	DNA	hAT-Ac	DNA/hAT-Ac	Contig[0060]#DNA/hAT-Ac	199	4	3	4	4.9449	2.5	0.277904	0	0	0	706	176.5	199	0.000466106
Contig[0061]	DNA	TcMar	DNA/TcMar	Contig[0061]#DNA/TcMar	2438	30	4	28	14.7255	27.55	1.86306	2.55	1.77295	3.9	19823	660.767	330.5	0.0130873
Contig[0063]	unclass	unclass	unclass/unclass	Contig[0063]#unclass/unclass	394	8	5	8	10.584	1.9	1.59574	0	1.09816	0	2888	361	394	0.00190668
Contig[0064]	unclass	unclass	unclass/unclass	Contig[0064]#unclass/unclass	210	19	8	19	15.5123	25	1.84629	1.4	1.73216	0.6	3312	174.316	185	0.00218661
Contig[0065].H	DNA	TcMar-pogo	DNA/TcMar-pogo	Contig[0065].H#DNA/TcMar-pogo	762	31	4	31	19.9417	27.1	2.54974	2.6	2.70548	2.6	15224	491.097	554	0.010051
Contig[0067]	unclass	unclass	unclass/unclass	Contig[0067]#unclass/unclass	400	11	6	11	8.94055	2.8	1.32034	0	0.918506	0.2	3388	308	398	0.00223678
Contig[0068]	unclass	unclass	unclass/unclass	Contig[0068]#unclass/unclass	776	20	7	18	12.2174	23.7	1.70042	0.35	1.60027	0.75	8857	442.85	512	0.00584745
Contig[0069].H	DNA	TcMar	DNA/TcMar	Contig[0069].H#DNA/TcMar	921	48	2	46	10.762	19.45	2.15345	0.25	1.151	1.55	15048	313.5	166.5	0.0099348
Contig[0070]	DNA	TcMar	DNA/TcMar	Contig[0070]#DNA/TcMar	753	12	3	12	9.43952	14.3	0.986078	1.05	1.16866	0.5	5071	422.583	318	0.00334791
Contig[0071].chkTE	unclass	unclass	unclass/unclass	Contig[0071].chkTE#unclass/unclass	528	5	4	5	4.00113	3.4	0.26622	0.4	0.507367	0.2	2389	477.8	526	0.00157723
Contig[0072]	unclass	unclass	unclass/unclass	Contig[0072]#unclass/unclass	194	13	4	13	3.64701	3.1	0.802301	0	0.40046	0	1738	133.692	110	0.00114744
Contig[0073].fam4.2TIR.C.DDE	DNA	TcMar	DNA/TcMar	Contig[0073].fam4.2TIR.C.DDE#DNA/TcMar	4046	239	1	209	11.1096	21.1	2.70971	2.5	3.06856	2.2	101158	423.255	173	0.0667852	60	3.96e-05
Contig[0074].chkTE	unclass	unclass	unclass/unclass	Contig[0074].chkTE#unclass/unclass	325	16	7	16	4.2267	5.1	0.415135	0	0.350321	0	3112	194.5	210.5	0.00205456
Contig[0075]	unclass	unclass	unclass/unclass	Contig[0075]#unclass/unclass	135	9	5	9	4.19053	3	0.185392	0	0.366546	0	1109	123.222	134	0.00073217
Contig[0076].MITE.2TIR.TSD.C	DNA	MuDR	DNA/MuDR	Contig[0076].MITE.2TIR.TSD.C#DNA/MuDR	3256	41	1	37	14.5061	27.2	2.35589	2.9	2.34539	2.4	27295	665.732	410	0.0180204
Contig[0077]	DNA	TcMar	DNA/TcMar	Contig[0077]#DNA/TcMar	316	17	3	16	3.33002	3.2	1.47248	0	0.662068	0.4	3994	234.941	226	0.00263687
Contig[0078]	DNA	TcMar	DNA/TcMar	Contig[0078]#DNA/TcMar	428	13	1	13	16.2365	28.3	1.69867	2.2	1.70507	1.2	4224	324.923	164	0.00278872
Contig[0079]	unclass	unclass	unclass/unclass	Contig[0079]#unclass/unclass	548	28	3	26	20.1158	26.1	3.89076	1.2	1.40799	3.05	8658	309.214	261	0.00571607	8	5.28e-06
Contig[0081]	DNA	Merlin	DNA/Merlin	Contig[0081]#DNA/Merlin	1289	28	3	28	18.9926	29.9	2.68568	2	2.04668	1.75	15477	552.75	375.5	0.010218
Contig[0082].chkTE	DNA	TcMar	DNA/TcMar	Contig[0082].chkTE#DNA/TcMar	178	9	4	9	6.84803	0.8	1.72412	0	1.32975	0	1526	169.556	156	0.00100748
Contig[0083]	unclass	unclass	unclass/unclass	Contig[0083]#unclass/unclass	512	14	5	14	11.0563	15.75	1.70092	0.4	1.3821	1.15	5105	364.643	390	0.00337036
Contig[0085]	unclass	unclass	unclass/unclass	Contig[0085]#unclass/unclass	188	22	5	22	4.68985	3.8	0.0600192	0	0.211556	0	3124	142	175.5	0.00206249
Contig[0086]	unclass	unclass	unclass/unclass	Contig[0086]#unclass/unclass	621	80	6	64	4.05996	5	1.96311	0	0.930138	0.3	24441	305.512	246.5	0.0161361	84	5.55e-05
Contig[0087]	unclass	unclass	unclass/unclass	Contig[0087]#unclass/unclass	247	27	5	27	21.7246	28	1.09669	0.7	1.24833	1	4471	165.593	147	0.00295179
Contig[0088].H	DNA	Merlin	DNA/Merlin	Contig[0088].H#DNA/Merlin	1051	44	1	37	20.2589	28.1	2.70342	3.8	2.98178	3.35	14202	322.773	177.5	0.00937626
Contig[0089]	unclass	unclass	unclass/unclass	Contig[0089]#unclass/unclass	432	38	6	37	13.4019	15.4	4.44925	3.9	3.79832	3.5	10935	287.763	354	0.00721936
Contig[0090]	DNA	TcMar	DNA/TcMar	Contig[0090]#DNA/TcMar	255	4	4	4	0.1	0	0	0	0	0	1020	255	255	0.000673411
Contig[0091].T-S.check	nonLTR	nonLTR	nonLTR/nonLTR	Contig[0091].T-S.check#nonLTR/nonLTR	732	14	6	14	6.00856	3	0.902061	0.3	0.889812	0.1	6017	429.786	365.5	0.00397247
Contig[0092]	unclass	unclass	unclass/unclass	Contig[0092]#unclass/unclass	563	12	2	12	12.6209	12.9	0.537817	0	0.184104	0.1	3353	279.417	203.5	0.00221367
Contig[0093]	DNA	hAT-Tip100	DNA/hAT-Tip100	Contig[0093]#DNA/hAT-Tip100	804	7	0	7	6.43995	5.1	0.827985	0.8	0.95486	0.2	4949	707	903	0.00326736
Contig[0094].H	DNA	hAT-Ac	DNA/hAT-Ac	Contig[0094].H#DNA/hAT-Ac	695	16	4	16	11.7373	23.75	2.79708	2.65	1.87279	3.3	5142	321.375	222	0.00339478
Contig[0096]	DNA	Merlin	DNA/Merlin	Contig[0096]#DNA/Merlin	513	14	5	14	15.1145	27.05	2.24102	3.3	2.28671	3.15	4885	348.929	374	0.00322511
Contig[0098]	DNA	TcMar	DNA/TcMar	Contig[0098]#DNA/TcMar	432	10	0	9	16.1694	19.15	2.29636	1.9	2.32021	2	7079	707.9	734	0.00467361
Contig[0099].chkTE	unclass	unclass	unclass/unclass	Contig[0099].chkTE#unclass/unclass	637	16	3	15	19.8835	22.75	3.60926	1.45	1.68731	2	7768	485.5	434	0.00512849
Contig[0100]	unclass	unclass	unclass/unclass	Contig[0100]#unclass/unclass	406	10	4	10	16.0878	26.9	1.21467	1.55	1.4223	0.7	3027	302.7	393.5	0.00199845
Contig[0101]	unclass	unclass	unclass/unclass	Contig[0101]#unclass/unclass	156	4	4	4	2.75323	2.9	0.645806	0	0	0	620	155	155	0.000409328
Contig[0102].H	DNA	TcMar	DNA/TcMar	Contig[0102].H#DNA/TcMar	527	1	0	1	24.3	24.3	8	8	4.3	4.3	112	112	112	7.39e-05
Contig[0104]	unclass	unclass	unclass/unclass	Contig[0104]#unclass/unclass	321	2	0	2	23.3034	16.7	5.15657	3.2	5.72057	3.55	175	87.5	87.5	0.000115536
Contig[0105]	unclass	unclass	unclass/unclass	Contig[0105]#unclass/unclass	291	8	4	8	2.39461	9.3	0	0	0	0	1336	167	167	0.000882037
Contig[0106]	DNA	TcMar	DNA/TcMar	Contig[0106]#DNA/TcMar	306	4	4	4	0.075	0	0	0	0	0	1224	306	306	0.000808093
Contig[0107].H	DNA	TcMar	DNA/TcMar	Contig[0107].H#DNA/TcMar	389	60	6	60	20.9941	25.15	3.23974	4.1	3.72535	3.5	12213	203.55	167	0.00806311
Contig[0108]	DNA	TcMar	DNA/TcMar	Contig[0108]#DNA/TcMar	186	1	1	1	1.1	1.1	0	0	0	0	186	186	186	0.000122799
Contig[0109]	DNA	TcMar	DNA/TcMar	Contig[0109]#DNA/TcMar	462	10	1	8	15.4372	20.2	3.25364	1.1	2.05557	2.2	3158	315.8	292.5	0.00208493
Contig[0111].fam2.1TIR.P	DNA	hAT	DNA/hAT	Contig[0111].fam2.1TIR.P#DNA/hAT	3003	14	1	13	5.27049	6.1	1.99607	3.5	2.442	2.1	11625	830.357	264.5	0.00767491
Contig[0112]	unclass	unclass	unclass/unclass	Contig[0112]#unclass/unclass	163	3	3	3	0	0	0	0	0	0	489	163	163	0.000322841
Contig[0113]	DNA	TcMar	DNA/TcMar	Contig[0113]#DNA/TcMar	258	15	3	15	23.6287	26.4	1.88657	1.4	2.11408	1.4	3202	213.467	216	0.00211398
Contig[0115]	DNA	hAT-Ac	DNA/hAT-Ac	Contig[0115]#DNA/hAT-Ac	390	11	5	11	8.4179	4.8	1.57644	0	1.14733	1.3	3184	289.455	350	0.0021021
Contig[0116].chkTE	unclass	unclass	unclass/unclass	Contig[0116].chkTE#unclass/unclass	184	7	6	7	0.684224	0.5	0	0	0	0	1141	163	184	0.000753296
Contig[0117].fam1.2TIR.C.notMAC	DNA	piggyBac	DNA/piggyBac	Contig[0117].fam1.2TIR.C.notMAC#DNA/piggyBac	1985	38	2	35	18.7772	26.35	2.5883	2.95	2.7818	2.4	20297	534.132	252.5	0.0134002
Contig[0118]	unclass	unclass	unclass/unclass	Contig[0118]#unclass/unclass	160	6	5	6	0	0	0	0	0	0	831	138.5	160	0.000548632
Contig[0119]	unclass	unclass	unclass/unclass	Contig[0119]#unclass/unclass	1670	23	4	19	15.9997	25.3	4.24752	1.7	2.65152	5.7	19901	865.261	906	0.0131388
Contig[0122].H	DNA	TcMar	DNA/TcMar	Contig[0122].H#DNA/TcMar	1190	44	3	42	16.9707	24.9	2.27138	2.1	1.88582	2.25	12705	288.75	168.5	0.00838793
Contig[0123]	unclass	unclass	unclass/unclass	Contig[0123]#unclass/unclass	153	6	4	6	3.74344	0	0	0	0.406824	0	762	127	153	0.000503078
Contig[0125]	DNA	TcMar	DNA/TcMar	Contig[0125]#DNA/TcMar	500	36	4	34	23.1581	27.2	2.10872	1.4	1.77638	1.75	11905	330.694	330	0.00785976
Contig[0126]	unclass	unclass	unclass/unclass	Contig[0126]#unclass/unclass	241	7	5	7	7.73302	4.2	0.18513	0	0.443185	0	1614	230.571	241	0.00106557
Contig[0127].H	DNA	TcMar	DNA/TcMar	Contig[0127].H#DNA/TcMar	291	27	4	26	17.2497	15.4	3.31758	1.2	1.62015	1.4	5797	214.704	212	0.00382722
Contig[0128]	unclass	unclass	unclass/unclass	Contig[0128]#unclass/unclass	177	15	4	15	19.4239	26.9	1.01611	0	1.6095	0	2179	145.267	146	0.00143859
Contig[0130]	unclass	unclass	unclass/unclass	Contig[0130]#unclass/unclass	213	11	5	11	11.8081	19	0.62278	0	0.430006	0	1633	148.455	191	0.00107812
Contig[0131]	unclass	unclass	unclass/unclass	Contig[0131]#unclass/unclass	200	7	6	7	6.45791	3	0.494273	0	0.353973	0	1397	199.571	200	0.000922309
Contig[0132].fam2.2TIR.C.notMAC	DNA	piggyBac	DNA/piggyBac	Contig[0132].fam2.2TIR.C.notMAC#DNA/piggyBac	2192	55	0	51	16.3915	29.3	2.34225	3.2	2.95276	3.3	27844	506.255	345	0.0183828
Contig[0133].H.2ends.DDE	DNA	Merlin	DNA/Merlin	Contig[0133].H.2ends.DDE#DNA/Merlin	542	92	0	83	26.4464	28.55	3.26774	3.35	3.90066	2.8	28827	313.337	253	0.0190318
Contig[0138]	unclass	unclass	unclass/unclass	Contig[0138]#unclass/unclass	536	15	5	15	13.7355	22	1.97596	0.7	1.43444	1.9	4942	329.467	276	0.00326274
Contig[0141]	DNA	TcMar	DNA/TcMar	Contig[0141]#DNA/TcMar	269	18	5	17	14.4972	22.7	1.85614	0.45	1.43463	0	3459	192.167	204.5	0.00228366
Contig[0142].chkTE	unclass	unclass	unclass/unclass	Contig[0142].chkTE#unclass/unclass	334	6	3	6	12.4683	12.2	2.94737	1.8	1.85459	1.85	1938	323	330	0.00127948
Contig[0143]	DNA	TcMar	DNA/TcMar	Contig[0143]#DNA/TcMar	438	9	3	9	11.7389	21.8	1.33741	0	1.08076	0.7	2729	303.222	325	0.00180171
Contig[0144]	unclass	unclass	unclass/unclass	Contig[0144]#unclass/unclass	356	5	3	5	1.53722	1.7	2.57188	0	0	0	1636	327.2	349	0.0010801
Contig[0148]	DNA	Merlin	DNA/Merlin	Contig[0148]#DNA/Merlin	234	3	3	3	0.830966	0.8	0	0	0.268182	0	704	234.667	234	0.000464786
Contig[0151]	unclass	unclass	unclass/unclass	Contig[0151]#unclass/unclass	155	2	2	2	0.35	0.35	0	0	0	0	310	155	155	0.000204664
Contig[0154].chkTE	unclass	unclass	unclass/unclass	Contig[0154].chkTE#unclass/unclass	453	13	2	13	10.3148	20.5	1.04431	0	0.674764	0.8	2968	228.308	123	0.00195949
Contig[0156]	unclass	unclass	unclass/unclass	Contig[0156]#unclass/unclass	722	13	4	13	10.4512	10.4	0.956569	0	0.534698	0.2	6767	520.538	599	0.00446762
Contig[0157].chkTE	unclass	unclass	unclass/unclass	Contig[0157].chkTE#unclass/unclass	4530	287	0	224	12.387	17.1	1.55061	0.7	1.24352	1.1	143438	499.784	260	0.0946988	65	4.29e-05
Contig[0158]	unclass	unclass	unclass/unclass	Contig[0158]#unclass/unclass	118	7	6	7	3.07034	1.7	0	0	1.01667	0	816	116.571	118	0.000538729
Contig[0161]	unclass	unclass	unclass/unclass	Contig[0161]#unclass/unclass	271	5	4	5	5.56653	5.2	0.894932	0	0.0872084	0.4	1243	248.6	271	0.000820637
Contig[0162]	DNA	Merlin	DNA/Merlin	Contig[0162]#DNA/Merlin	345	20	6	20	17.9857	24.7	5.05077	2.55	3.65295	3.15	5588	279.4	271	0.00368924
Contig[0165].H	DNA	TcMar	DNA/TcMar	Contig[0165].H#DNA/TcMar	460	45	6	44	16.5686	21.9	2.53167	3.8	3.87621	2	8498	188.844	144	0.00561044
Contig[0166]	unclass	unclass	unclass/unclass	Contig[0166]#unclass/unclass	159	30	1	30	18.2275	18.5	0.593227	0.6	1.28499	0.25	6954	231.8	208.5	0.00459108
Contig[0167]	DNA	TcMar	DNA/TcMar	Contig[0167]#DNA/TcMar	348	9	4	9	11.9837	2	1.54049	0	1.39538	0.6	2855	317.222	346	0.00188489
Contig[0171]	DNA	Merlin	DNA/Merlin	Contig[0171]#DNA/Merlin	260	5	0	5	22.1752	26.8	1.52904	2.9	3.10393	1.4	916	183.2	202	0.00060475
Contig[0173]	unclass	unclass	unclass/unclass	Contig[0173]#unclass/unclass	745	66	11	60	13.7012	12.25	3.97658	0.9	1.30663	2.05	25430	385.303	373	0.0167891	2	1.32e-06
Contig[0175]	unclass	unclass	unclass/unclass	Contig[0175]#unclass/unclass	155	3	3	3	0	0	0	0	0	0	465	155	155	0.000306996
Contig[0176].chkTE	unclass	unclass	unclass/unclass	Contig[0176].chkTE#unclass/unclass	1276	20	3	17	16.1045	31	2.37915	2.05	2.08361	4.25	10007	500.35	342.5	0.00660669
Contig[0179]	unclass	unclass	unclass/unclass	Contig[0179]#unclass/unclass	151	4	3	4	0	0	0	0	0	0	596	149	151	0.000393483
Contig[0180]	unclass	unclass	unclass/unclass	Contig[0180]#unclass/unclass	303	10	3	10	9.94015	12.15	1.31962	0	0.926658	0.3	2187	218.7	232.5	0.00144387
Contig[0182]	unclass	unclass	unclass/unclass	Contig[0182]#unclass/unclass	1126	2	0	2	28.6279	15.05	4.47014	2.35	3.0435	1.6	777	388.5	388.5	0.000512981
Contig[0183]	DNA	TcMar	DNA/TcMar	Contig[0183]#DNA/TcMar	685	21	5	21	11.9522	27.5	1.8834	1.1	1.12264	0	6607	314.619	296	0.00436199
Contig[0187].H	DNA	TcMar	DNA/TcMar	Contig[0187].H#DNA/TcMar	284	52	1	45	25.4504	27.8	3.69986	2.85	3.25535	3.1	11789	226.712	206	0.00778318
Contig[0188]	unclass	unclass	unclass/unclass	Contig[0188]#unclass/unclass	304	70	1	68	13.9104	16.95	4.97071	2.3	2.25186	3.7	9928	141.829	130	0.00655454
Contig[0189]	unclass	unclass	unclass/unclass	Contig[0189]#unclass/unclass	387	61	10	61	11.741	16.1	2.98413	1.3	3.08935	1.6	12862	210.852	188	0.00849158
Contig[0191]	unclass	unclass	unclass/unclass	Contig[0191]#unclass/unclass	687	21	3	21	17.2961	25.6	3.82961	2.9	1.9986	3.7	7913	376.81	308	0.00522422
Contig[0192].H	DNA	TcMar	DNA/TcMar	Contig[0192].H#DNA/TcMar	400	31	5	31	25.1614	30.7	2.4583	1.8	2.2343	2.6	9182	296.194	346	0.00606202
Contig[0195]	DNA	hAT-Ac	DNA/hAT-Ac	Contig[0195]#DNA/hAT-Ac	477	6	1	6	9.71751	10.55	1.28778	1.55	1.37001	0.45	3044	507.333	595	0.00200967
Contig[0204]	unclass	unclass	unclass/unclass	Contig[0204]#unclass/unclass	889	10	3	10	4.86437	14.95	0.69674	1.1	0.6346	1.75	3896	389.6	151	0.00257217
Contig[0205]	unclass	unclass	unclass/unclass	Contig[0205]#unclass/unclass	181	4	3	4	8.48729	7.4	0.0612452	0	0.0612452	0	787	196.75	241	0.000519583
Contig[0207].H	DNA	hAT-Ac	DNA/hAT-Ac	Contig[0207].H#DNA/hAT-Ac	1277	10	3	10	5.779	23.7	1.35332	1.8	1.0147	2.95	5019	501.9	177	0.00331358
Contig[0208].chkTE	unclass	unclass	unclass/unclass	Contig[0208].chkTE#unclass/unclass	509	13	0	13	24.4332	25.2	5.45781	5.7	5.93233	4.2	2991	230.077	174	0.00197468
Contig[0210]	unclass	unclass	unclass/unclass	Contig[0210]#unclass/unclass	1329	6	2	5	6.6958	25.1	0.824586	1.4	0.950457	1.6	3502	583.667	316.5	0.00231204
Contig[0211].fam3.2TIR.C	DNA	Merlin	DNA/Merlin	Contig[0211].fam3.2TIR.C#DNA/Merlin	2936	16	2	16	15.4415	29.9	2.13129	3.95	2.5606	3.6	11923	745.188	502	0.00787165
Contig[0212]	unclass	unclass	unclass/unclass	Contig[0212]#unclass/unclass	622	44	1	42	10.9724	14.4	5.10733	2.1	2.54728	1.6	11589	263.386	257.5	0.00765114
Contig[0213]	unclass	unclass	unclass/unclass	Contig[0213]#unclass/unclass	356	22	0	22	21.985	25.3	2.49351	2.05	2.19608	1.95	4974	226.091	241.5	0.00328387
Contig[0214]	DNA	hAT-Tip100	DNA/hAT-Tip100	Contig[0214]#DNA/hAT-Tip100	1352	25	3	25	21.6013	28.7	3.1894	4.2	3.27291	3.4	14804	592.16	440	0.00977371
Contig[0215].H	DNA	TcMar	DNA/TcMar	Contig[0215].H#DNA/TcMar	165	11	3	11	20.1766	26.8	2.35642	1.9	2.35678	1.9	1659	150.818	158	0.00109528
Contig[0216].chkTE	unclass	unclass	unclass/unclass	Contig[0216].chkTE#unclass/unclass	340	3	2	3	4.32166	0	0.129219	0	0.129219	0	794	264.667	340	0.000524204
Contig[0217]	unclass	unclass	unclass/unclass	Contig[0217]#unclass/unclass	566	2	2	2	0	0	0	0	0	0	1132	566	566	0.000747354
Contig[0218]	DNA	hAT-Ac	DNA/hAT-Ac	Contig[0218]#DNA/hAT-Ac	898	9	3	9	6.56667	21.5	1.48187	0	0.883113	1.5	3630	403.333	249	0.00239655
Contig[0220]	DNA	TcMar	DNA/TcMar	Contig[0220]#DNA/TcMar	174	10	1	10	21.1726	23.9	1.32979	0.8	1.64248	0.8	2373	237.3	176.5	0.00156667
Contig[0222].chkTE	unclass	unclass	unclass/unclass	Contig[0222].chkTE#unclass/unclass	154	12	5	12	0.0690583	0	0	0	0	0	1561	130.083	151	0.00103058
Contig[0223]	DNA	TcMar	DNA/TcMar	Contig[0223]#DNA/TcMar	517	29	2	28	12.3755	12.2	2.75514	0.2	0.593391	0.6	10092	348	410	0.00666281	23	1.52e-05
Contig[0224]	DNA	TcMar	DNA/TcMar	Contig[0224]#DNA/TcMar	910	32	2	32	11.964	20.3	1.28104	0.95	1.31609	0.3	14073	439.781	348.5	0.00929109
Contig[0226]	unclass	unclass	unclass/unclass	Contig[0226]#unclass/unclass	304	27	9	26	6.47288	6.2	3.45744	0	1.6906	0.3	5383	199.37	189	0.0035539
Contig[0227]	DNA	TcMar	DNA/TcMar	Contig[0227]#DNA/TcMar	1438	112	1	104	16.4652	18.4	2.44392	1.05	1.20466	1.65	51942	463.768	308.5	0.0342925	455	0.000300394
Contig[0229]	unclass	unclass	unclass/unclass	Contig[0229]#unclass/unclass	1331	17	0	15	5.66465	5	0.8632	1.1	0.714528	0.4	8625	507.353	335	0.00569429
Contig[0232]	unclass	unclass	unclass/unclass	Contig[0232]#unclass/unclass	520	26	9	24	6.09493	6.2	2.69519	0	0.154762	0.8	9072	348.923	453.5	0.0059894
Contig[0236].chkTE	unclass	unclass	unclass/unclass	Contig[0236].chkTE#unclass/unclass	775	37	6	34	13.8086	14.4	1.29873	0.8	1.13821	0.8	19613	530.081	386	0.0129486	11	7.26e-06
Contig[0239].H	DNA	TcMar	DNA/TcMar	Contig[0239].H#DNA/TcMar	1069	109	5	91	19.6122	29	2.83302	3.7	3.09323	3.1	34432	315.89	206	0.0227322
Contig[0242]	unclass	unclass	unclass/unclass	Contig[0242]#unclass/unclass	772	26	2	25	17.8276	23	3.02422	2.35	2.14022	3	8160	313.846	202.5	0.00538729
Contig[0246]	unclass	unclass	unclass/unclass	Contig[0246]#unclass/unclass	492	12	2	12	2.10974	2	0.396954	0	0.213288	0.2	3808	317.333	354	0.00251407
Contig[0247]	unclass	unclass	unclass/unclass	Contig[0247]#unclass/unclass	391	20	4	20	17.0069	21.35	2.28502	1	2.70038	2.35	5509	275.45	247	0.00363708
Contig[0248].H	DNA	TcMar	DNA/TcMar	Contig[0248].H#DNA/TcMar	542	21	1	15	11.7864	12	1.75779	1.8	1.77692	1.3	6773	322.524	292	0.00447158
Contig[0249]	unclass	unclass	unclass/unclass	Contig[0249]#unclass/unclass	534	7	3	7	8.2379	11	0.407237	0	0.0370252	0	2501	357.286	463	0.00165118
Contig[0250].H	DNA	TcMar	DNA/TcMar	Contig[0250].H#DNA/TcMar	625	12	5	12	8.69328	19.75	0.949103	0.1	0.604001	0.1	4124	343.667	261	0.00272269
Contig[0251].fam1.2TIR.C	DNA	TcMar	DNA/TcMar	Contig[0251].fam1.2TIR.C#DNA/TcMar	1314	42	2	40	11.6952	22.95	2.24137	2.05	1.88524	3.7	12149	289.262	169.5	0.00802086
Contig[0255]	unclass	unclass	unclass/unclass	Contig[0255]#unclass/unclass	1126	12	3	12	16.2588	18.45	0.507111	1	1.4572	0.35	10266	855.5	1103	0.00677769
Contig[0256].check-RbCopia-65_PT-I	unclass	unclass	unclass/unclass	Contig[0256].check-RbCopia-65_PT-I#unclass/unclass	716	11	5	11	16.6027	20.6	1.46843	1	0.825307	1.9	6674	606.727	713	0.00440622
Contig[0260].chkTE	unclass	unclass	unclass/unclass	Contig[0260].chkTE#unclass/unclass	1260	12	4	12	11.0448	17.5	0.247606	0.35	0.317327	0.1	7497	624.75	372	0.00494957
Contig[0261]	DNA	TcMar	DNA/TcMar	Contig[0261]#DNA/TcMar	902	12	0	12	29.5232	29.6	4.9438	3	4.17052	4.6	5244	437	426.5	0.00346213
Contig[0262].chkTE	unclass	unclass	unclass/unclass	Contig[0262].chkTE#unclass/unclass	327	25	3	25	11.523	13	2.70174	2	2.13243	1.8	4956	198.24	196	0.00327199
Contig[0263].H	DNA	TcMar	DNA/TcMar	Contig[0263].H#DNA/TcMar	1211	38	8	35	9.74441	6.6	2.47763	0.8	1.30369	1.65	23371	615.026	477	0.0154297	34	2.24e-05
Contig[0264].fam2.2TIR.C	DNA	TcMar	DNA/TcMar	Contig[0264].fam2.2TIR.C#DNA/TcMar	1370	120	11	111	13.1715	22.15	2.55536	1.2	1.95326	1.7	60435	503.625	347.5	0.0398996	45	2.97e-05
Contig[0267].H	DNA	TcMar	DNA/TcMar	Contig[0267].H#DNA/TcMar	828	37	6	36	15.4953	25.6	2.73611	3.5	2.56744	2.8	11365	307.162	184	0.00750325
Contig[0269].chkTE	unclass	unclass	unclass/unclass	Contig[0269].chkTE#unclass/unclass	539	5	4	5	5.64779	5.5	0	0	0	0	2553	510.6	539	0.00168551
Contig[0271].chkTE	unclass	unclass	unclass/unclass	Contig[0271].chkTE#unclass/unclass	395	7	7	7	3.82629	2.5	0.0996741	0	0	0	2762	394.571	395	0.00182349
Contig[0272].H	DNA	Merlin	DNA/Merlin	Contig[0272].H#DNA/Merlin	527	30	2	29	24.6644	30.5	1.94539	2.5	2.56215	1.6	7903	263.433	152.5	0.00521762
Contig[0278]	unclass	unclass	unclass/unclass	Contig[0278]#unclass/unclass	333	4	4	4	2.92528	2.85	0	0	0.0751688	0	1333	333.25	333	0.000880056
Contig[0281]	DNA	TcMar	DNA/TcMar	Contig[0281]#DNA/TcMar	2213	218	0	196	7.19043	7.8	3.0746	0.3	0.593128	1.6	113936	522.642	298	0.0752214	196	0.000129401
Contig[0282]	DNA	TcMar	DNA/TcMar	Contig[0282]#DNA/TcMar	2264	254	6	219	14.8124	17.4	3.21091	1.1	1.31627	2.6	142764	562.063	378	0.0942538	249	0.000164392
Contig[0284].fam3.2TIR.C.DDE	DNA	TcMar	DNA/TcMar	Contig[0284].fam3.2TIR.C.DDE#DNA/TcMar	3726	918	0	864	10.7371	12.85	2.78327	0.6	1.48631	0.85	296745	323.252	172	0.195913	6173	0.00407546
Contig[0285]	unclass	unclass	unclass/unclass	Contig[0285]#unclass/unclass	348	11	2	11	7.95532	5.8	1.0346	1.6	2.42328	0.3	2925	265.909	309	0.00193111
Contig[0287]	DNA	hAT-Ac	DNA/hAT-Ac	Contig[0287]#DNA/hAT-Ac	753	21	6	20	10.7593	8.1	2.38766	1.5	1.9588	2.5	11175	532.143	471	0.00737781
Contig[0290].chkTE	unclass	unclass	unclass/unclass	Contig[0290].chkTE#unclass/unclass	900	28	3	28	12.4249	18.65	1.74613	5.05	2.949	2.65	7869	281.036	122.5	0.00519517
Contig[0291].chkTE	unclass	unclass	unclass/unclass	Contig[0291].chkTE#unclass/unclass	433	39	4	39	13.6924	15	3.22101	0	1.36073	0.8	7609	195.103	140	0.00502352
Contig[0292].H	DNA	TcMar	DNA/TcMar	Contig[0292].H#DNA/TcMar	441	63	4	63	22.2498	27.1	2.20602	1.8	2.17813	1.4	10612	168.444	141	0.00700612
Contig[0293]	DNA	TcMar	DNA/TcMar	Contig[0293]#DNA/TcMar	424	14	4	14	20.5099	18.9	3.01535	2.3	2.30368	1.7	8039	574.214	677	0.00530741
Contig[0294]	DNA	TcMar	DNA/TcMar	Contig[0294]#DNA/TcMar	511	33	2	30	20.4343	26.2	2.38526	1.9	2.17549	2.1	8263	250.394	194	0.00545529
Contig[0295]	DNA	TcMar	DNA/TcMar	Contig[0295]#DNA/TcMar	275	41	8	37	25.0962	27.4	2.41019	1.6	2.21992	2.2	8447	206.024	205	0.00557677
Contig[0296]	unclass	unclass	unclass/unclass	Contig[0296]#unclass/unclass	333	5	5	5	1.49928	0.9	0.119784	0	0	0	1663	332.6	333	0.00109792
Contig[0297]	DNA	hAT-Ac	DNA/hAT-Ac	Contig[0297]#DNA/hAT-Ac	732	4	0	4	21.3177	20.85	9.18315	2.05	1.42473	6.2	457	114.25	112	0.000301715
Contig[0298].chkTE	unclass	unclass	unclass/unclass	Contig[0298].chkTE#unclass/unclass	669	28	5	27	21.4063	28.25	1.99619	2.2	2.79554	1.8	11349	405.321	408.5	0.00749269
Contig[0302].fam6.noTIR.C.DDE	DNA	TcMar	DNA/TcMar	Contig[0302].fam6.noTIR.C.DDE#DNA/TcMar	3685	899	0	801	11.6442	12.3	2.72437	2.4	2.4454	1.3	354175	393.966	223	0.233829	1871	0.00123525
Contig[0303].chkTE	unclass	unclass	unclass/unclass	Contig[0303].chkTE#unclass/unclass	413	9	4	9	5.69815	3.2	1.74029	1.3	1.17565	0	2653	294.778	358	0.00175153
Contig[0304].chkTE	unclass	unclass	unclass/unclass	Contig[0304].chkTE#unclass/unclass	991	17	3	17	5.06454	5	1.30086	0	0.717136	0	6991	411.235	333	0.00461551
Contig[0305].fam7.noTIR.C.DDE	DNA	TcMar	DNA/TcMar	Contig[0305].fam7.noTIR.C.DDE#DNA/TcMar	3798	494	1	447	7.91018	7.8	2.56087	1.3	1.83443	1.1	247124	500.251	285.5	0.163153	758	0.000500437
Contig[0308]	DNA	TcMar	DNA/TcMar	Contig[0308]#DNA/TcMar	561	25	8	25	12.5314	7	2.46419	1.1	1.37137	1.6	11467	458.68	423	0.00757059
Contig[0313]	DNA	Merlin	DNA/Merlin	Contig[0313]#DNA/Merlin	372	28	1	21	20.3801	27.3	2.50918	1.7	2.21948	1.9	7491	267.536	198.5	0.00494561
Contig[0314]	DNA	TcMar	DNA/TcMar	Contig[0314]#DNA/TcMar	315	4	0	4	6.67993	0.2	0.907052	0	0	0	553	138.25	125	0.000365095
Contig[0315]	unclass	unclass	unclass/unclass	Contig[0315]#unclass/unclass	539	26	4	24	16.5191	25.45	2.36751	2.55	2.17961	2.55	8984	345.538	385.5	0.0059313	12	7.92e-06
Contig[0317]	unclass	unclass	unclass/unclass	Contig[0317]#unclass/unclass	210	9	4	9	0.890619	0.9	0	0	0.0663689	0	1567	174.111	208	0.00103454
Contig[0320]	unclass	unclass	unclass/unclass	Contig[0320]#unclass/unclass	255	25	5	25	23.2703	30	1.22578	0.8	1.29576	0.7	4741	189.64	176	0.00313004
Contig[0322]	unclass	unclass	unclass/unclass	Contig[0322]#unclass/unclass	244	9	3	8	9.66034	8	0.324262	0	0.411413	0	1253	139.222	114	0.000827239
Contig[0325]	unclass	unclass	unclass/unclass	Contig[0325]#unclass/unclass	332	18	2	18	8.0834	7.55	1.34425	0.15	1.03479	0.5	3711	206.167	233	0.00245003
Contig[0327]	unclass	unclass	unclass/unclass	Contig[0327]#unclass/unclass	189	15	3	15	8.43112	15.1	0.816397	2.7	1.70121	0	1976	131.733	128	0.00130457
Contig[0328]	unclass	unclass	unclass/unclass	Contig[0328]#unclass/unclass	173	6	3	6	1.65708	0	0.108155	0	0.216309	0	932	155.333	172	0.000615313
Contig[0330].TSD.DDE	DNA	TcMar	DNA/TcMar	Contig[0330].TSD.DDE#DNA/TcMar	1209	155	1	144	23.1838	26.2	4.04968	2.4	2.89514	3.4	73318	473.019	372	0.0484051
Contig[0332]	unclass	unclass	unclass/unclass	Contig[0332]#unclass/unclass	373	17	2	16	6.23724	3.9	0.664145	0	0.590757	0.3	4111	241.824	229	0.00271411
Contig[0333].fam8.noTIR.C.DDE	DNA	TcMar	DNA/TcMar	Contig[0333].fam8.noTIR.C.DDE#DNA/TcMar	3603	600	0	538	9.2988	12.9	3.25945	1.9	3.17402	1.8	251584	419.307	205	0.166098	2557	0.00168815
Contig[0334].H	DNA	TcMar	DNA/TcMar	Contig[0334].H#DNA/TcMar	909	39	3	33	19.5641	29.8	2.57189	2.8	2.49529	2.8	16651	426.949	335	0.0109931
Contig[0335]	unclass	unclass	unclass/unclass	Contig[0335]#unclass/unclass	233	12	6	12	4.67287	4.55	0.785787	0	0.852729	0.4	2547	212.25	231.5	0.00168155
Contig[0341]	DNA	Merlin	DNA/Merlin	Contig[0341]#DNA/Merlin	715	24	4	23	18.7512	27.9	2.2747	1.25	2.5079	1.2	9455	393.958	470	0.00624226
Contig[0342]	DNA	Maverick-Tlr	DNA/Maverick-Tlr	Contig[0342]#DNA/Maverick-Tlr	298	24	7	23	15.2514	16.1	2.76599	1.5	1.91958	1.5	7778	324.083	296.5	0.00513509
Contig[0343]	unclass	unclass	unclass/unclass	Contig[0343]#unclass/unclass	157	22	6	22	9.03251	9.2	1.62985	0.1	3.13158	0.8	3467	157.591	194.5	0.00228894
Contig[0344].chkTE	unclass	unclass	unclass/unclass	Contig[0344].chkTE#unclass/unclass	681	24	4	23	14.3115	19.85	3.08892	0.9	0.88624	0.95	6933	288.875	185.5	0.00457722
Contig[0345]	unclass	unclass	unclass/unclass	Contig[0345]#unclass/unclass	147	8	4	8	11.5789	11.7	0.45932	0	0.45932	0	1089	136.125	138	0.000718965
Contig[0346]	DNA	TcMar	DNA/TcMar	Contig[0346]#DNA/TcMar	732	20	6	19	18.4174	29.6	3.26731	1.85	2.3594	2.6	9544	477.2	543.5	0.00630102
Contig[0348].chkTE	DNA	TcMar	DNA/TcMar	Contig[0348].chkTE#DNA/TcMar	1081	119	8	111	9.28113	10	2.81753	0.4	0.952598	0.7	44047	370.143	283	0.0290801	34	2.24e-05
Contig[0349]	unclass	unclass	unclass/unclass	Contig[0349]#unclass/unclass	917	38	5	35	12.8536	11.55	2.897	0.3	0.760906	0.9	16816	442.526	328.5	0.011102
Contig[0351].chkTE	unclass	unclass	unclass/unclass	Contig[0351].chkTE#unclass/unclass	991	49	6	41	7.21065	5.2	3.22105	1.9	3.29514	0.6	17833	363.939	205	0.0117735	4	2.64e-06
Contig[0352]	unclass	unclass	unclass/unclass	Contig[0352]#unclass/unclass	231	9	4	9	8.72896	5.8	2.9692	0.5	0.5609	0	1578	175.333	178	0.00104181
Contig[0354].H.Polinton.POL.noend	DNA	Maverick	DNA/Maverick	Contig[0354].H.Polinton.POL.noend#DNA/Maverick	3398	169	1	129	16.3864	23.7	3.29088	3	2.61162	4.2	73655	435.828	266	0.0486276	33	2.18e-05
Contig[0358].H	DNA	Maverick	DNA/Maverick	Contig[0358].H#DNA/Maverick	1211	110	4	103	11.6229	12.55	2.34031	1.1	1.62213	1.25	50052	455.018	290	0.0330447	64	4.23e-05
Contig[0360].check-RbBEL-86_AA-I	unclass	unclass	unclass/unclass	Contig[0360].check-RbBEL-86_AA-I#unclass/unclass	659	14	7	13	6.3924	5.75	1.30632	0.8	1.26693	1.2	7121	508.643	562	0.00470133
Contig[0361].check-RbTt.Tlr5pr.HC	unclass	unclass	unclass/unclass	Contig[0361].check-RbTt.Tlr5pr.HC#unclass/unclass	694	24	3	23	15.8864	23.35	2.0251	0.6	1.20268	1.3	7272	303	220.5	0.00480103
Contig[0364]	DNA	TcMar	DNA/TcMar	Contig[0364]#DNA/TcMar	189	10	5	10	8.46015	7.4	1.3934	0	0.192766	0	1576	157.6	180	0.00104049
Contig[0366].H	DNA	TcMar	DNA/TcMar	Contig[0366].H#DNA/TcMar	1203	86	2	82	18.1876	24.7	2.70174	2.6	2.36191	2.9	21157	246.012	112	0.013968	40	2.64e-05
Contig[0368].chkTE	unclass	unclass	unclass/unclass	Contig[0368].chkTE#unclass/unclass	1241	586	7	402	9.39365	11.55	5.0256	1.4	2.85361	2.2	142630	243.396	145.5	0.0941653	1111	0.00073349
Contig[0369]	unclass	unclass	unclass/unclass	Contig[0369]#unclass/unclass	698	20	6	19	13.2406	16.2	1.30047	0.75	0.694762	0.8	7942	397.1	299	0.00524336
Contig[0371].H	DNA	TcMar	DNA/TcMar	Contig[0371].H#DNA/TcMar	474	22	6	22	18.1274	25.85	2.7588	2.4	2.10507	2.3	6779	308.136	258.5	0.00447554
Contig[0373].H	DNA	TcMar	DNA/TcMar	Contig[0373].H#DNA/TcMar	1131	55	4	54	19.8016	26.8	3.28544	2.4	2.3426	2.4	24222	440.4	295	0.0159915	8	5.28e-06
Contig[0374].chkTE	unclass	unclass	unclass/unclass	Contig[0374].chkTE#unclass/unclass	136	5	4	5	3.12964	0.7	1.23292	0	0.152886	0	641	128.2	136	0.000423193
Contig[0375].chkTE	unclass	unclass	unclass/unclass	Contig[0375].chkTE#unclass/unclass	477	70	10	66	9.11138	10.25	3.31486	0.95	1.71905	2.8	17238	246.257	267.5	0.0113806
Contig[0377]	DNA	TcMar	DNA/TcMar	Contig[0377]#DNA/TcMar	342	25	2	25	15.9778	11.7	2.59887	1.3	1.62054	1.1	8793	351.72	307	0.0058052
Contig[0379].chkTE	DNA	TcMar	DNA/TcMar	Contig[0379].chkTE#DNA/TcMar	383	8	4	8	5.46243	6.25	1.57361	0.4	0.911503	0.65	2808	351	376.5	0.00185386
Contig[0380]	unclass	unclass	unclass/unclass	Contig[0380]#unclass/unclass	126	6	3	6	3.09058	4.05	0.141449	0	0.604493	0	690	115	124	0.000455543
Contig[0382]	unclass	unclass	unclass/unclass	Contig[0382]#unclass/unclass	305	21	0	21	9.07352	9	4.65937	0.7	1.35963	3.6	4290	204.286	221	0.00283229
Contig[0387]	unclass	unclass	unclass/unclass	Contig[0387]#unclass/unclass	382	210	15	189	8.32425	7.1	5.65881	1.4	2.51027	3.5	39146	186.41	148	0.0258445	81	5.35e-05
Contig[0388].Pol.P	DNA	Maverick	DNA/Maverick	Contig[0388].Pol.P#DNA/Maverick	4212	183	4	160	15.6241	23.2	3.0201	2.4	2.43605	3.2	114194	624.011	290	0.0753917	119	7.86e-05
Contig[0389]	DNA	TcMar	DNA/TcMar	Contig[0389]#DNA/TcMar	910	41	11	38	10.2291	7.4	1.87892	1.3	1.69263	0.9	22269	543.146	385	0.0147022
Contig[0392]	DNA	TcMar	DNA/TcMar	Contig[0392]#DNA/TcMar	344	20	7	20	16.6474	25.65	1.87292	1.2	2.27224	1.35	5551	277.55	332.5	0.00366481
Contig[0393]	unclass	unclass	unclass/unclass	Contig[0393]#unclass/unclass	287	59	21	57	8.71911	9.4	3.97799	0	1.00865	1.6	12530	212.373	248	0.00827239	9	5.94e-06
Contig[0395]	DNA	TcMar	DNA/TcMar	Contig[0395]#DNA/TcMar	806	40	2	39	2.87863	2.5	2.32219	0.25	0.852314	0.4	15728	393.2	230.5	0.0103837	24	1.58e-05
Contig[0400]	DNA	TcMar	DNA/TcMar	Contig[0400]#DNA/TcMar	501	97	1	91	14.729	13.2	3.2197	2.1	2.57909	1.6	29998	309.258	213	0.0198049	5	3.3e-06
Contig[0401].chkTE	unclass	unclass	unclass/unclass	Contig[0401].chkTE#unclass/unclass	564	22	4	20	12.256	13.35	3.36834	3.15	4.87849	1.35	7830	355.909	456	0.00516942
Contig[0405]	unclass	unclass	unclass/unclass	Contig[0405]#unclass/unclass	193	22	10	21	5.30611	5.2	1.29403	0.9	1.52855	0	3436	156.182	182	0.00226847
Contig[0408]	unclass	unclass	unclass/unclass	Contig[0408]#unclass/unclass	363	56	7	53	10.8075	11.9	1.90468	0.15	1.18726	0.6	11118	198.536	195	0.00734018
Contig[0411]	unclass	unclass	unclass/unclass	Contig[0411]#unclass/unclass	315	9	4	9	4.49018	1.3	0.68353	0	0.346551	0	1609	178.778	94	0.00106227
Contig[0420]	unclass	unclass	unclass/unclass	Contig[0420]#unclass/unclass	596	12	0	11	16.8434	17.05	1.43647	0.25	1.26371	1.35	2827	235.583	178.5	0.00186641
Contig[0426].H	DNA	TcMar	DNA/TcMar	Contig[0426].H#DNA/TcMar	353	50	1	49	20.6492	24.5	2.28205	1.6	2.31703	1.2	7885	157.7	117	0.00520573
Contig[0434].chkTE	unclass	unclass	unclass/unclass	Contig[0434].chkTE#unclass/unclass	451	27	5	26	15.101	19.7	1.57724	1.7	2.06937	0.7	9465	350.556	350	0.00624886
Contig[0435]	unclass	unclass	unclass/unclass	Contig[0435]#unclass/unclass	156	9	5	9	9.67917	4.5	0.3	0	0	0	1085	120.556	155	0.000716325
Contig[0438]	unclass	unclass	unclass/unclass	Contig[0438]#unclass/unclass	175	4	3	4	4.8506	4.9	1.03663	0.3	1.19847	1.15	587	146.75	174	0.000387542
Contig[0439]	DNA	TcMar	DNA/TcMar	Contig[0439]#DNA/TcMar	664	37	6	34	7.15839	5.8	0.873481	0.2	0.572489	0.3	13711	370.568	358	0.0090521	59	3.9e-05
Contig[0441]	unclass	unclass	unclass/unclass	Contig[0441]#unclass/unclass	1705	99	7	92	13.0458	16.5	1.70812	0.6	1.06192	1.2	50957	514.717	230	0.0336422	29	1.91e-05
Contig[0443].H.Polinton	DNA	Maverick	DNA/Maverick	Contig[0443].H.Polinton#DNA/Maverick	586	31	2	29	13.6929	12.9	2.55757	0	1.2935	0.7	9842	317.484	198	0.00649776	3	1.98e-06
Contig[0448]	DNA	TcMar	DNA/TcMar	Contig[0448]#DNA/TcMar	212	7	3	7	13.3973	24.4	0.531729	0	0.0930481	0.8	1122	160.286	136	0.000740752
Contig[0450].chkTE	unclass	unclass	unclass/unclass	Contig[0450].chkTE#unclass/unclass	148	7	1	6	2.35059	2.2	0	0	0	0	597	85.2857	85	0.000394144
Contig[0452].H.Polinton	DNA	Maverick	DNA/Maverick	Contig[0452].H.Polinton#DNA/Maverick	1989	173	5	159	19.3619	22.6	2.35284	1	1.52527	1.8	95537	552.237	343	0.0630742	41	2.71e-05
Contig[0456]	unclass	unclass	unclass/unclass	Contig[0456]#unclass/unclass	472	73	8	67	9.56416	11.2	3.16366	1.1	2.52766	0.8	17427	238.726	217	0.0115054
Contig[0457]	DNA	TcMar	DNA/TcMar	Contig[0457]#DNA/TcMar	791	84	4	79	12.7634	6.45	1.93978	2.3	2.54831	1	35016	416.857	379.5	0.0231178
Contig[0462]	unclass	unclass	unclass/unclass	Contig[0462]#unclass/unclass	166	27	10	26	7.62341	5	2.11993	0	1.529	0.6	3673	136.037	151	0.00242494
Contig[0463]	unclass	unclass	unclass/unclass	Contig[0463]#unclass/unclass	200	15	4	15	7.37033	7.5	0.0855188	0	0.955099	0	2265	151	155	0.00149537
Contig[0466]	unclass	unclass	unclass/unclass	Contig[0466]#unclass/unclass	226	15	4	15	15.8948	24.8	0.387186	0	0.928925	0	2427	161.8	164	0.00160232
Contig[0467]	DNA	TcMar	DNA/TcMar	Contig[0467]#DNA/TcMar	436	29	4	26	15.2095	23.4	3.58568	1.9	2.11255	3	4701	162.103	118	0.00310363
Contig[0470].H.Polinton	DNA	Maverick	DNA/Maverick	Contig[0470].H.Polinton#DNA/Maverick	649	38	5	37	15.854	16.2	2.27956	0.9	1.24333	1.4	20217	532.026	389	0.0133474	2	1.32e-06
Contig[0478]	unclass	unclass	unclass/unclass	Contig[0478]#unclass/unclass	207	8	5	8	10.4155	10.9	0.125759	0	0.125759	0	1646	205.75	207	0.0010867
Contig[0479].check-RbTt.Tlr5pr.HC	unclass	unclass	unclass/unclass	Contig[0479].check-RbTt.Tlr5pr.HC#unclass/unclass	134	19	3	19	13.9683	16.4	0.990324	0	0.142508	0	2129	112.053	122	0.00140558
Contig[0480].chkTE	unclass	unclass	unclass/unclass	Contig[0480].chkTE#unclass/unclass	1478	154	4	139	11.7911	19.35	2.47852	0.8	1.24399	2.1	64234	417.104	351.5	0.0424077	42	2.77e-05
Contig[0482]	DNA	TcMar	DNA/TcMar	Contig[0482]#DNA/TcMar	288	6	2	5	18.9726	19.9	3.15318	1.45	3.00442	3.25	2057	342.833	294	0.00135805
Contig[0484].H.Polinton	DNA	Maverick	DNA/Maverick	Contig[0484].H.Polinton#DNA/Maverick	1387	110	2	106	17.6166	12.1	2.21208	1.1	1.5964	1.5	68824	625.673	511	0.0454381	24	1.58e-05
Contig[0485]	DNA	Merlin	DNA/Merlin	Contig[0485]#DNA/Merlin	574	18	2	16	12.6219	10.05	1.38282	1.45	1.66509	1.15	4784	265.778	199.5	0.00315843
Contig[0487]	unclass	unclass	unclass/unclass	Contig[0487]#unclass/unclass	744	193	10	179	18.0481	17.4	3.09768	0.9	1.9318	2.4	90013	466.389	395	0.0594272	5	3.3e-06
Contig[0488].H	DNA	TcMar	DNA/TcMar	Contig[0488].H#DNA/TcMar	1169	44	3	42	16.1786	27.25	2.37027	1.9	1.50156	2.15	21460	487.727	343	0.014168
Contig[0489].chkTE	unclass	unclass	unclass/unclass	Contig[0489].chkTE#unclass/unclass	482	7	3	7	2.62285	2.9	0.491504	0	0.196829	0.2	2460	351.429	477	0.00162411
Contig[0491]	unclass	unclass	unclass/unclass	Contig[0491]#unclass/unclass	214	8	6	8	1.94646	1.9	0.355764	0	0.284306	0.25	1440	180	213.5	0.000950698
Contig[0494].chkTE	unclass	unclass	unclass/unclass	Contig[0494].chkTE#unclass/unclass	394	28	1	28	22.3686	29.25	1.72612	0	1.69933	0	6988	249.571	112	0.00461353
Contig[0495].chkTE	unclass	unclass	unclass/unclass	Contig[0495].chkTE#unclass/unclass	1037	44	1	40	10.6545	8.3	2.50634	0.2	0.784532	1.95	20585	467.841	352	0.0135904	22	1.45e-05
Contig[0498]	DNA	TcMar	DNA/TcMar	Contig[0498]#DNA/TcMar	637	47	3	46	23.9589	29.1	2.89156	2.4	2.50292	2.5	18791	399.809	404	0.012406
Contig[0499]	unclass	unclass	unclass/unclass	Contig[0499]#unclass/unclass	147	17	5	16	15.3915	22.3	0.793085	0.7	0.890047	0	1909	112.294	137	0.00126034
Contig[0501].H	DNA	hAT-Ac	DNA/hAT-Ac	Contig[0501].H#DNA/hAT-Ac	436	21	7	21	11.6085	9.2	2.29198	2.5	2.59445	2	6395	304.524	301	0.00422202
Contig[0503]	unclass	unclass	unclass/unclass	Contig[0503]#unclass/unclass	268	15	8	15	4.2683	4.2	0.883841	0	1.2937	0	3874	258.267	267	0.00255764
Contig[0504].chkTE	unclass	unclass	unclass/unclass	Contig[0504].chkTE#unclass/unclass	930	8	3	7	4.18201	2.9	0.84677	0.1	1.08772	0.35	3885	485.625	326.5	0.0025649	38	2.51e-05
Contig[0506]	DNA	TcMar	DNA/TcMar	Contig[0506]#DNA/TcMar	3072	1614	0	1456	7.85814	7.8	3.4666	1.3	1.762	2.1	765542	474.314	291.5	0.505416	1412	0.000932212
Contig[0507].H	DNA	hAT-Ac	DNA/hAT-Ac	Contig[0507].H#DNA/hAT-Ac	514	16	2	16	15.0594	25.2	2.11941	2.65	1.91251	2.45	5187	324.188	270.5	0.00342449
Contig[0508].chkTE	unclass	unclass	unclass/unclass	Contig[0508].chkTE#unclass/unclass	449	9	3	9	15.6512	21.1	1.56481	1.8	1.73061	1.8	2728	303.111	252	0.00180105
Contig[0509]	unclass	unclass	unclass/unclass	Contig[0509]#unclass/unclass	442	15	5	15	5.83789	7.5	0.641058	0	0.601186	0.2	5144	342.933	406	0.0033961
Contig[0512].check-RbhAT-30_SM	unclass	unclass	unclass/unclass	Contig[0512].check-RbhAT-30_SM#unclass/unclass	2499	203	0	180	15.4646	19.9	2.41343	1	1.4632	1.6	104529	514.921	374	0.0690108	21	1.39e-05
Contig[0517]	DNA	Maverick	DNA/Maverick	Contig[0517]#DNA/Maverick	539	71	7	70	13.5312	14.9	2.07568	1.4	2.32958	1.2	24566	346	357	0.0162186	13	8.58e-06
Contig[0521].chkTE	DNA	Tlr	DNA/Tlr	Contig[0521].chkTE#DNA/Tlr	671	64	11	63	13.0749	14.05	1.78778	0.2	0.898738	0.55	25347	396.047	357	0.0167343	31	2.05e-05
Contig[0522]	unclass	unclass	unclass/unclass	Contig[0522]#unclass/unclass	352	109	15	107	13.9808	13.8	3.65457	2.6	2.6087	2.5	15142	138.917	114	0.00999686
Contig[0525]	DNA	TcMar	DNA/TcMar	Contig[0525]#DNA/TcMar	779	80	12	73	13.1744	12.3	2.2854	0.8	1.42771	1.55	40253	503.163	360	0.0265753	29	1.91e-05
Contig[0529]	unclass	unclass	unclass/unclass	Contig[0529]#unclass/unclass	552	30	6	27	14.1232	9.55	2.74587	0.7	1.15332	1.7	9280	309.333	275.5	0.00612672	10	6.6e-06
Contig[0530]	unclass	unclass	unclass/unclass	Contig[0530]#unclass/unclass	508	48	14	47	7.82557	8.5	2.30297	1.6	1.91162	1.4	20720	431.667	504	0.0136795
Contig[0532].chkTE	unclass	unclass	unclass/unclass	Contig[0532].chkTE#unclass/unclass	465	14	3	12	7.95808	7.95	4.74514	0.45	2.05134	1.45	3755	268.214	278	0.00247908
Contig[0533].chkTE	DNA	TcMar	DNA/TcMar	Contig[0533].chkTE#DNA/TcMar	281	16	4	16	9.92346	7.8	0.567034	0.1	0.538405	0.4	2997	187.312	132	0.00197864
Contig[0534].chkTE	unclass	unclass	unclass/unclass	Contig[0534].chkTE#unclass/unclass	865	30	0	29	20.0415	23	3.507	0.35	1.4734	2.1	12145	404.833	398	0.00801822	3	1.98e-06
Contig[0538].chkTE	DNA	DNA	DNA/DNA	Contig[0538].chkTE#DNA/DNA	645	155	0	154	7.92015	8.6	3.43093	0.5	1.31732	1.2	37054	239.058	204	0.0244633	37	2.44e-05
Contig[0541]	unclass	unclass	unclass/unclass	Contig[0541]#unclass/unclass	139	9	3	9	5.01246	5	0.413455	0	0.514618	0.7	1204	133.778	135	0.000794889
Contig[0542]	unclass	unclass	unclass/unclass	Contig[0542]#unclass/unclass	495	24	6	22	9.38921	6.8	3.22017	0.35	0.636193	0.3	8242	343.417	378	0.00544143
Contig[0545]	unclass	unclass	unclass/unclass	Contig[0545]#unclass/unclass	252	11	6	11	5.93673	7	3.52333	0	0.763001	0.7	2246	204.182	237	0.00148282
Contig[0547]	Viral	Baculovirus	Viral/Baculovirus	Contig[0547]#Viral/Baculovirus	1476	95	0	87	23.072	27	2.28628	2.5	2.54261	1.6	49806	524.274	446	0.0328823
Contig[0549]	unclass	unclass	unclass/unclass	Contig[0549]#unclass/unclass	535	52	13	45	10.414	5.4	2.83578	1.1	2.10695	1.5	17896	344.154	320	0.0118151	6	3.96e-06
Contig[0564].chkTE	unclass	unclass	unclass/unclass	Contig[0564].chkTE#unclass/unclass	785	84	3	78	12.4112	13.15	1.93852	1.1	1.4585	0.9	29061	345.964	269	0.0191863	2	1.32e-06
Contig[0565]	unclass	unclass	unclass/unclass	Contig[0565]#unclass/unclass	472	148	2	144	9.24243	10.65	2.60943	4.5	5.55235	1.1	25776	174.162	159.5	0.0170175	3	1.98e-06
Contig[0568].RNApol	Viral	Baculovirus	Viral/Baculovirus	Contig[0568].RNApol#Viral/Baculovirus	na	246	0	208	13.4939	18.4	1.7574	3.35	5.44981	1.35	110128	447.675	230	0.0727073	41	2.71e-05
Contig[0572]	unclass	unclass	unclass/unclass	Contig[0572]#unclass/unclass	355	60	13	60	12.9053	13.55	7.0486	1.25	1.86871	7.75	14766	246.1	230	0.00974862
Contig[0574]	unclass	unclass	unclass/unclass	Contig[0574]#unclass/unclass	160	23	3	23	5.82446	4.8	0.974685	0	0.487078	0.6	2461	107	89	0.00162477
Contig[0582]	unclass	unclass	unclass/unclass	Contig[0582]#unclass/unclass	289	79	8	72	10.0584	10.8	3.67588	0.3	1.80731	1.2	11547	146.165	107	0.00762341	222	0.000146566
Contig[0586]	unclass	unclass	unclass/unclass	Contig[0586]#unclass/unclass	346	9	4	9	7.6045	3.2	1.32341	0	0.412773	1	2200	244.444	316	0.00145246
Contig[0589]	DNA	Tlr	DNA/Tlr	Contig[0589]#DNA/Tlr	498	46	9	46	14.189	13.5	4.41919	0	0.729335	1.4	15797	343.413	395	0.0104293	6	3.96e-06
Contig[0590].C	DNA	TcMar-pogo	DNA/TcMar-pogo	Contig[0590].C#DNA/TcMar-pogo	2370	48	0	43	16.3731	28.05	2.37265	3.95	2.54053	3.55	25690	535.208	348	0.0169607	8	5.28e-06
Contig[0593]	DNA	TcMar	DNA/TcMar	Contig[0593]#DNA/TcMar	168	56	0	54	13.3822	12.4	2.20934	0.2	2.26804	1.1	7970	142.321	78	0.00526185
Contig[0594]	unclass	unclass	unclass/unclass	Contig[0594]#unclass/unclass	253	11	5	11	11.1551	10.4	0.585667	0.4	0.621946	0	2693	244.818	251	0.00177794
Contig[0598].chkTE	unclass	unclass	unclass/unclass	Contig[0598].chkTE#unclass/unclass	432	31	2	31	6.0514	9.8	2.09669	0.9	1.23436	0.9	6708	216.387	142	0.00442867
Contig[0599].chkTE	DNA	Maverick-Tlr	DNA/Maverick-Tlr	Contig[0599].chkTE#DNA/Maverick-Tlr	816	55	8	54	10.2945	10.1	3.25521	0.4	0.883897	2.1	20797	378.127	302	0.0137303	19	1.25e-05
Contig[0603]	DNA	TcMar	DNA/TcMar	Contig[0603]#DNA/TcMar	419	24	0	24	18.7149	20.25	4.5945	2.6	2.44762	3.65	8708	362.833	212.5	0.00574908
Contig[0606]	unclass	unclass	unclass/unclass	Contig[0606]#unclass/unclass	409	41	4	41	6.70134	5	2.56241	2	3.21699	1.5	8409	205.098	205	0.00555168
Contig[0608]	unclass	unclass	unclass/unclass	Contig[0608]#unclass/unclass	238	15	8	15	14.8363	7.3	0.662108	0	0.209699	0	3320	221.333	237	0.00219189
Contig[0609]	unclass	unclass	unclass/unclass	Contig[0609]#unclass/unclass	446	24	3	20	18.9474	26.2	3.00501	4.5	3.0846	4.15	5947	247.792	259.5	0.00392625
Contig[0610]	unclass	unclass	unclass/unclass	Contig[0610]#unclass/unclass	360	9	4	9	11.2656	9.2	0.345045	0	0.209783	0	2351	261.222	348	0.00155215
Contig[0618]	unclass	unclass	unclass/unclass	Contig[0618]#unclass/unclass	511	41	15	41	15.0389	17.3	1.95081	1.6	2.0854	1.1	16153	393.976	490	0.0106643
Contig[0619].chkTE	unclass	unclass	unclass/unclass	Contig[0619].chkTE#unclass/unclass	401	34	10	33	4.70169	4.05	2.32164	0	0.298092	0.7	7337	215.794	148.5	0.00484394
Contig[0621].chkTE	unclass	unclass	unclass/unclass	Contig[0621].chkTE#unclass/unclass	528	7	4	7	9.47465	6.7	0.739104	0	0.61846	0	2611	373	525	0.0017238
Contig[0623]	unclass	unclass	unclass/unclass	Contig[0623]#unclass/unclass	377	168	29	167	10.4454	10.1	4.52811	0.8	2.25208	2.25	38903	231.565	151	0.025684	4	2.64e-06
Contig[0626]	unclass	unclass	unclass/unclass	Contig[0626]#unclass/unclass	135	28	14	28	7.75301	7.2	0.674289	1.2	2.63129	0	3586	128.071	134	0.0023675
Contig[0634].chkTE	DNA	MITE	DNA/MITE	Contig[0634].chkTE#DNA/MITE	179	61	5	60	5.44324	5.3	2.00899	1.2	2.28028	0.6	8072	132.328	164	0.00532919
Contig[0638].chkTE	unclass	unclass	unclass/unclass	Contig[0638].chkTE#unclass/unclass	170	45	11	45	15.1871	17	1.63988	0.6	2.11304	0.7	6780	150.667	159	0.0044762
Contig[0639]	unclass	unclass	unclass/unclass	Contig[0639]#unclass/unclass	222	7	1	7	12.1657	11.3	0.0527304	0.1	1.73629	0.1	1758	251.143	224	0.00116064
Contig[0641]	unclass	unclass	unclass/unclass	Contig[0641]#unclass/unclass	325	12	4	12	11.7126	5.7	0.716949	0.15	1.00275	0.3	3015	251.25	297.5	0.00199052
Contig[0642].chkTE	unclass	unclass	unclass/unclass	Contig[0642].chkTE#unclass/unclass	2483	18	3	14	15.9295	25.55	1.30414	2.7	1.35098	3.1	24859	1381.06	944.5	0.0164121
Contig[0647]	unclass	unclass	unclass/unclass	Contig[0647]#unclass/unclass	577	37	9	36	17.4192	21.4	2.32969	1.4	1.58491	1.2	14802	400.054	496	0.00977238
Contig[0649].fam1.2Tir.C.DDE	DNA	Merlin	DNA/Merlin	Contig[0649].fam1.2Tir.C.DDE#DNA/Merlin	2169	55	3	53	14.8451	28.1	2.86379	2.3	1.82874	2.4	25895	470.818	186	0.0170961	5	3.3e-06
Contig[0652].chkTE	unclass	unclass	unclass/unclass	Contig[0652].chkTE#unclass/unclass	678	109	5	98	12.3451	14	2.32478	0.9	2.92684	1.1	31238	286.587	237	0.0206235	29	1.91e-05
Contig[0660].H	DNA	TcMar	DNA/TcMar	Contig[0660].H#DNA/TcMar	650	54	5	49	16.6101	25.75	2.15692	3	2.44975	2.3	11645	215.648	130.5	0.00768811
Contig[0661].H	DNA	TcMar	DNA/TcMar	Contig[0661].H#DNA/TcMar	776	52	3	52	20.5344	25.3	2.87274	2.5	2.51207	3.1	17888	344	275	0.0118098	28	1.85e-05
Contig[0663]	unclass	unclass	unclass/unclass	Contig[0663]#unclass/unclass	332	53	9	52	8.49192	6.9	2.25563	1.2	1.8146	0.6	11293	213.075	209	0.00745572
Contig[0664].H	DNA	TcMar	DNA/TcMar	Contig[0664].H#DNA/TcMar	1222	62	5	62	14.6863	24.1	2.37135	1.4	1.71997	2	27301	440.339	222	0.0180243	21	1.39e-05
Contig[0666]	unclass	unclass	unclass/unclass	Contig[0666]#unclass/unclass	157	37	10	36	10.9073	11.5	0.470168	0	0.54828	0	4884	132	154	0.00322445
Contig[0667]	DNA	Merlin	DNA/Merlin	Contig[0667]#DNA/Merlin	390	34	5	30	15.6866	10.85	2.29924	0.45	1.43148	1.05	7411	217.971	209.5	0.00489279
Contig[0670].high.copy.nb	unclass	unclass	unclass/unclass	Contig[0670].high.copy.nb#unclass/unclass	433	116	3	114	10.3063	8.65	5.29904	1.8	3.12758	4.25	33684	290.379	318	0.0222384	74	4.89e-05
Contig[0671]	unclass	unclass	unclass/unclass	Contig[0671]#unclass/unclass	740	136	0	129	14.7747	15.85	2.25294	0.6	1.0582	1.4	46457	341.596	241.5	0.0306712	55	3.63e-05
Contig[0674].chkTE	unclass	unclass	unclass/unclass	Contig[0674].chkTE#unclass/unclass	840	51	1	50	7.71319	7.5	3.10744	1.4	2.0699	1.7	21577	423.078	353	0.0142453
Contig[0675]	unclass	unclass	unclass/unclass	Contig[0675]#unclass/unclass	375	48	5	42	11.2114	12.1	3.77816	0.3	1.95543	0.3	7281	151.688	158	0.00480697
Contig[0677].P	DNA	DNA	DNA/DNA	Contig[0677].P#DNA/DNA	3050	705	2	630	8.84682	8.9	3.34145	2.6	3.01243	1.8	348054	493.694	262	0.229788	714	0.000471388
Contig[0678]	unclass	unclass	unclass/unclass	Contig[0678]#unclass/unclass	258	39	11	39	7.39741	7.5	6.20808	0	1.25495	5.3	6784	173.949	147	0.00447885
Contig[0680]	unclass	unclass	unclass/unclass	Contig[0680]#unclass/unclass	448	90	11	89	17.3996	18.2	3.16861	0.95	1.54795	1.45	23567	261.856	254	0.0155591
Contig[0682]	unclass	unclass	unclass/unclass	Contig[0682]#unclass/unclass	257	27	4	26	13.8387	11.9	0.833781	0	1.11675	0	4168	154.37	132	0.00275174
Contig[0684]	unclass	unclass	unclass/unclass	Contig[0684]#unclass/unclass	387	43	9	41	4.32521	4.2	3.43585	0.5	0.679113	0.9	9834	228.698	211	0.00649248
Contig[0688]	DNA	TcMar	DNA/TcMar	Contig[0688]#DNA/TcMar	553	94	5	93	11.7237	11.75	2.90889	0.7	1.48962	0.8	30629	325.84	279	0.0202215	59	3.9e-05
Contig[0689]	DNA	Maverick-Tlr	DNA/Maverick-Tlr	Contig[0689]#DNA/Maverick-Tlr	304	38	8	38	15.9995	19.3	1.32298	0	0.971122	0.15	8335	219.342	275.5	0.00550283
Contig[0691]	unclass	unclass	unclass/unclass	Contig[0691]#unclass/unclass	381	2161	10	2110	12.0281	11.7	6.58996	2.6	3.62362	4.1	496079	229.56	252	0.327515	121	7.99e-05
Contig[0692].H	DNA	TcMar	DNA/TcMar	Contig[0692].H#DNA/TcMar	155	18	1	18	22.6927	13.75	2.81042	1.2	2.66585	1.15	6401	355.611	186	0.00422598
Contig[0694]	unclass	unclass	unclass/unclass	Contig[0694]#unclass/unclass	559	116	10	108	11.5027	13.1	2.53086	1.5	2.09834	2.3	36564	315.207	294.5	0.0241398
Contig[0696].TIE1.P	DNA	Tlr	DNA/Tlr	Contig[0696].TIE1.P#DNA/Tlr	4567	344	3	316	10.2775	10.25	1.64126	1.2	1.89856	0.8	245991	715.09	432	0.162405	228	0.000150527
Contig[0700].conserved.nonTE?	unclass	unclass	unclass/unclass	Contig[0700].conserved.nonTE?#unclass/unclass	474	2826	199	2702	12.9699	13.3	6.6369	1.6	2.34673	5.6	845454	299.17	325	0.558175	42126	0.0278119
Contig[0702].chkTE	unclass	unclass	unclass/unclass	Contig[0702].chkTE#unclass/unclass	336	35	10	34	10.8534	9.9	2.95319	0.9	1.41372	1.7	9456	270.171	326	0.00624292	8	5.28e-06
Contig[0703]	unclass	unclass	unclass/unclass	Contig[0703]#unclass/unclass	1057	335	2	312	15.3623	13.7	3.03706	1.2	1.9145	1.5	99176	296.048	164	0.0654767	18	1.19e-05
Contig[0704]	unclass	unclass	unclass/unclass	Contig[0704]#unclass/unclass	144	63	5	62	9.21105	8.7	1.39002	0	0.881763	0	8055	127.857	133	0.00531797	11	7.26e-06
Contig[0708].chkTE	unclass	unclass	unclass/unclass	Contig[0708].chkTE#unclass/unclass	166	46	5	46	11.1386	9.35	2.3255	0	1.9123	0	5031	109.37	101	0.0033215
Contig[0709]	unclass	unclass	unclass/unclass	Contig[0709]#unclass/unclass	478	46	4	44	18.1409	15.05	2.38972	0	3.06682	0.65	16192	352	306	0.0106901
Contig[0710]	unclass	unclass	unclass/unclass	Contig[0710]#unclass/unclass	675	149	6	144	8.58744	10.8	4.10502	0.4	0.931729	1.3	45258	303.745	254	0.0298797	1363	0.000899862
Contig[0712]	unclass	unclass	unclass/unclass	Contig[0712]#unclass/unclass	1488	79	1	63	6.47341	6.1	3.84944	0.6	0.781215	1.4	33069	418.595	253	0.0218324	41	2.71e-05
Contig[0713]	unclass	unclass	unclass/unclass	Contig[0713]#unclass/unclass	450	38	7	36	15.4502	17.05	3.24555	0.25	1.04575	1.85	11033	290.342	296.5	0.00728406
Contig[0714]	unclass	unclass	unclass/unclass	Contig[0714]#unclass/unclass	262	9	6	9	7.32637	2.3	1.087	0.4	0.283851	0.8	2093	232.556	260	0.00138181
Contig[0717].chkTE	unclass	unclass	unclass/unclass	Contig[0717].chkTE#unclass/unclass	494	135	1	128	12.8687	13.5	2.88907	0.9	1.77673	1.3	35532	263.2	246	0.0234585	3	1.98e-06
Contig[0719]	DNA	Maverick-Tlr?	DNA/Maverick-Tlr?	Contig[0719]#DNA/Maverick-Tlr?	174	46	5	46	6.91328	5.8	0.816729	0	1.31189	0	6139	133.457	138.5	0.00405301
Contig[0724].chkTE	Viral	Baculovirus	Viral/Baculovirus	Contig[0724].chkTE#Viral/Baculovirus	na	7	0	7	11.4715	8.5	4.13173	0	6.47778	3.9	1998	285.429	232	0.00131909
Contig[0725]	unclass	unclass	unclass/unclass	Contig[0725]#unclass/unclass	377	136	8	125	15.208	17.05	4.92616	2.45	3.97934	2.75	19740	145.147	115.5	0.0130325	686	0.000452902
Contig[0726]	DNA	TcMar	DNA/TcMar	Contig[0726]#DNA/TcMar	321	25	0	25	6.87815	5	1.60493	0	2.25797	0	5208	208.32	182	0.00343836
Contig[0727].chkTE	DNA	Tlr	DNA/Tlr	Contig[0727].chkTE#DNA/Tlr	312	138	10	128	9.76131	9.3	3.56913	1	2.37787	2	25818	187.087	157	0.0170452	418	0.000275967
Contig[0728]	unclass	unclass	unclass/unclass	Contig[0728]#unclass/unclass	408	36	12	35	5.4798	4.55	2.46621	0.55	0.929985	1.2	10265	285.139	336	0.00677702
Contig[0730].chkTE	unclass	unclass	unclass/unclass	Contig[0730].chkTE#unclass/unclass	333	73	2	73	16.2527	16.9	2.47916	0.4	1.23992	1.3	17722	242.767	282	0.0117002
Contig[0732]	unclass	unclass	unclass/unclass	Contig[0732]#unclass/unclass	436	128	12	123	7.2414	9.45	2.27778	1.6	3.15677	1.5	20663	161.43	86.5	0.0136419	15	9.9e-06
Contig[0733].chkTE	unclass	unclass	unclass/unclass	Contig[0733].chkTE#unclass/unclass	430	144	16	138	11.6674	10.2	4.25703	1.3	2.1964	3.15	39997	277.757	285	0.0264063	22	1.45e-05
Contig[0734].Pol.P	DNA	Maverick-Tlr	DNA/Maverick-Tlr	Contig[0734].Pol.P#DNA/Maverick-Tlr	4858	470	0	406	16.9833	18.65	2.66834	3	3.60216	2.4	278906	593.417	398	0.184136	208	0.000137323
Contig[0736].chkTE	unclass	unclass	unclass/unclass	Contig[0736].chkTE#unclass/unclass	209	33	5	33	6.07575	5.6	2.07316	0.5	2.18963	0.5	5324	161.333	181	0.00351494
Contig[0738].chkTE	DNA	Tlr	DNA/Tlr	Contig[0738].chkTE#DNA/Tlr	250	29	0	29	8.58851	8.3	1.33223	0	0.939369	0.7	5197	179.207	187	0.0034311
Contig[0739]	unclass	unclass	unclass/unclass	Contig[0739]#unclass/unclass	183	613	2	602	10.5313	10.7	3.02321	0.7	2.3885	0.7	77388	126.245	137	0.0510921	3	1.98e-06
Contig[0740]	unclass	unclass	unclass/unclass	Contig[0740]#unclass/unclass	180	312	1	311	14.0699	13.1	4.83064	1.7	3.04327	2.35	45918	147.173	121.5	0.0303154	11	7.26e-06
Contig[0742]	unclass	unclass	unclass/unclass	Contig[0742]#unclass/unclass	221	118	17	118	13.0501	13.1	6.6906	2.75	3.77676	6.2	20149	170.754	198.5	0.0133025
Contig[0744]	unclass	unclass	unclass/unclass	Contig[0744]#unclass/unclass	189	103	20	103	15.3156	14.9	3.66461	1.1	1.89306	1.9	14457	140.359	169	0.00954461
Contig[0745]	unclass	unclass	unclass/unclass	Contig[0745]#unclass/unclass	197	61	14	61	8.69711	9	3.98272	2.1	2.65778	3.1	10372	170.033	186	0.00684767
Contig[0746].chkTE	DNA	Tlr	DNA/Tlr	Contig[0746].chkTE#DNA/Tlr	414	84	8	84	10.178	8.75	1.31025	0	2.232	0.6	16910	201.31	173	0.0111641	29	1.91e-05
Contig[0747].chkTE	DNA	TcMar	DNA/TcMar	Contig[0747].chkTE#DNA/TcMar	220	11	2	9	17.9426	20	3.07984	3.9	2.90948	3.9	2649	240.818	215	0.00174889
Contig[0748]	unclass	unclass	unclass/unclass	Contig[0748]#unclass/unclass	193	101	6	100	3.98686	1.7	2.63776	1.7	2.52143	2.1	12622	124.97	120	0.00833313	12	7.92e-06
R=1.chkTE	unclass	unclass	unclass/unclass	R=1.chkTE#unclass/unclass	499	507	9	495	16.9608	16.9	5.81736	3.1	3.95219	3.9	85191	168.03	172	0.0562437	1575	0.00103983
R=10.palindromic.nonTE?	DNA	DNA	DNA/DNA	R=10.palindromic.nonTE?#DNA/DNA	504	1045	71	992	15.1882	14.8	4.34597	1.8	2.6406	2.1	255884	244.865	198	0.168936	7368	0.00486441
R=1003	unclass	unclass	unclass/unclass	R=1003#unclass/unclass	495	32	6	32	10.0512	10.7	1.54494	0.7	1.52095	0.4	10548	329.625	334	0.00696386
R=1007	unclass	unclass	unclass/unclass	R=1007#unclass/unclass	121	56	0	55	12.7221	12.4	3.79799	4	6.20847	2.5	5324	95.0714	86	0.00351494	27	1.78e-05
R=1009	unclass	unclass	unclass/unclass	R=1009#unclass/unclass	86	21	5	21	11.2373	13.2	0.476095	0	0.920947	0	1690	80.4762	83	0.00111575
R=1014	unclass	unclass	unclass/unclass	R=1014#unclass/unclass	206	43	14	42	23.6749	24.4	1.59477	1	1.72098	1	7282	169.349	201	0.00480763
R=1017	unclass	unclass	unclass/unclass	R=1017#unclass/unclass	85	12	8	12	0.200787	0	0	0	0	0	1016	84.6667	85	0.00067077
R=102.chkTE	unclass	unclass	unclass/unclass	R=102.chkTE#unclass/unclass	1513	133	19	116	15.2204	17.5	2.5986	1.3	1.50544	1.5	91674	689.278	619	0.0605238	7	4.62e-06
R=1020	unclass	unclass	unclass/unclass	R=1020#unclass/unclass	132	13	7	13	2.04157	1.6	0.456787	0	0.25377	0	1525	117.308	129	0.00100682
R=1022	unclass	unclass	unclass/unclass	R=1022#unclass/unclass	53	10	4	10	4.50078	3.95	0	0	0	0	512	51.2	52	0.000338026
R=1027	unclass	unclass	unclass/unclass	R=1027#unclass/unclass	62	10	4	10	13.6713	14.3	1.48785	1.6	1.98676	0.2	642	64.2	61	0.000423853
R=1032.chkTE	unclass	unclass	unclass/unclass	R=1032.chkTE#unclass/unclass	592	44	8	42	9.41757	12.5	2.62516	2.6	5.13711	1.8	13530	307.5	257.5	0.0089326
R=1033	unclass	unclass	unclass/unclass	R=1033#unclass/unclass	52	3	3	3	1.26667	1.9	0	0	0	0	156	52	52	0.000102992
R=1038	unclass	unclass	unclass/unclass	R=1038#unclass/unclass	78	9	8	9	6.64077	7.7	0.429614	0	0.59485	0	699	77.6667	78	0.000461485
R=1041	unclass	unclass	unclass/unclass	R=1041#unclass/unclass	130	18	8	18	8.75212	8.35	1.5485	0	0.560812	0	2266	125.889	128.5	0.00149603
R=1043	unclass	unclass	unclass/unclass	R=1043#unclass/unclass	214	8	5	8	8.01491	5.65	0.980828	0	0.238892	0.5	1643	205.375	213	0.00108472
R=1048	unclass	unclass	unclass/unclass	R=1048#unclass/unclass	78	171	24	171	10.9537	10.5	1.0789	0	1.30884	0	10808	63.2047	66	0.00713552	36	2.38e-05
R=105	unclass	unclass	unclass/unclass	R=105#unclass/unclass	248	11	5	11	14.6004	14.4	2.05425	2	2.80516	1.9	2754	250.364	242	0.00181821
R=1053.chkTE	unclass	unclass	unclass/unclass	R=1053.chkTE#unclass/unclass	120	7	2	7	5.13243	6	0.27137	0	2.70488	0	737	105.286	113	0.000486573
R=1054	DNA	Tlr	DNA/Tlr	R=1054#DNA/Tlr	200	5	3	5	1.30964	0	0.0974619	0	0	0	985	197	200	0.000650304
R=1056	unclass	unclass	unclass/unclass	R=1056#unclass/unclass	176	10	4	10	14.3622	14.1	2.44318	0.6	1.53169	0.6	1679	167.9	169	0.00110849
R=1057.H	DNA	TcMar	DNA/TcMar	R=1057.H#DNA/TcMar	254	52	4	52	24.2537	26.75	2.40579	2	2.56588	1.85	9325	179.327	192	0.00615643
R=1058.chkTE	unclass	unclass	unclass/unclass	R=1058.chkTE#unclass/unclass	169	25	12	25	9.52473	8.3	2.26622	2.4	3.32621	1.1	3842	153.68	168	0.00253652
R=1062	DNA	TcMar	DNA/TcMar	R=1062#DNA/TcMar	110	12	5	10	12.9175	12.75	2.83814	1.9	3.71357	1.1	1290	107.5	91.5	0.000851667
R=1063.chkTE	unclass	unclass	unclass/unclass	R=1063.chkTE#unclass/unclass	131	26	9	26	12.9699	11.65	2.18841	2	3.16635	1.35	3037	116.808	129.5	0.00200505
R=1069.chkTE	DNA	TcMar	DNA/TcMar	R=1069.chkTE#DNA/TcMar	394	24	1	18	15.9708	19.35	3.78912	1.6	1.81028	3.75	8343	347.625	334	0.00550811
R=1072	unclass	unclass	unclass/unclass	R=1072#unclass/unclass	242	34	16	33	25.2607	26.2	2.00229	1.6	2.00892	1.7	7329	215.559	239	0.00483866
R=1074	unclass	unclass	unclass/unclass	R=1074#unclass/unclass	138	24	12	24	9.31631	8.45	1.44309	0	1.04487	0.7	2973	123.875	136	0.0019628
R=1076	DNA	Merlin	DNA/Merlin	R=1076#DNA/Merlin	934	54	4	45	19.2711	29.8	3.06369	2.9	2.51745	3.7	14836	274.741	188	0.00979483	4	2.64e-06
R=1078	unclass	unclass	unclass/unclass	R=1078#unclass/unclass	77	14	4	14	10.4854	12	0.816887	0	0	0	983	70.2143	72.5	0.000648984
R=1080	unclass	unclass	unclass/unclass	R=1080#unclass/unclass	75	24	20	24	4.96913	5.3	1.28893	0	2.12388	0	1788	74.5	75	0.00118045
R=1089	unclass	unclass	unclass/unclass	R=1089#unclass/unclass	486	6	2	6	8.45148	4.35	2.98487	1.3	3.42907	1.55	2195	365.833	396.5	0.00144915
R=109.chkTE	unclass	unclass	unclass/unclass	R=109.chkTE#unclass/unclass	305	49	0	49	8.95837	5.9	1.27018	0	1.41523	0	2049	41.8163	36	0.00135276
R=1093	unclass	unclass	unclass/unclass	R=1093#unclass/unclass	58	1	1	1	8.6	8.6	0	0	0	0	58	58	58	3.83e-05
R=1094	unclass	unclass	unclass/unclass	R=1094#unclass/unclass	113	24	15	24	11.2919	9.25	2.15946	0	0.893789	0	2415	100.625	110	0.0015944
R=1095.chkTE	unclass	unclass	unclass/unclass	R=1095.chkTE#unclass/unclass	89	3	1	3	11.8736	14.3	2.0136	1.2	1.6028	2.4	250	83.3333	83	0.000165052
R=1101	unclass	unclass	unclass/unclass	R=1101#unclass/unclass	73	10	4	10	8.39844	8.4	0.283404	0	0.142979	0	705	70.5	72	0.000465446
R=1104	unclass	unclass	unclass/unclass	R=1104#unclass/unclass	144	28	6	28	11.8175	8.7	1.01725	0	0.719861	0	4179	149.25	149.5	0.00275901
R=1105	unclass	unclass	unclass/unclass	R=1105#unclass/unclass	98	5	1	5	9.40051	10.5	1.53435	0	0	0	393	78.6	76	0.000259461
R=1108	unclass	unclass	unclass/unclass	R=1108#unclass/unclass	188	22	2	22	18.7527	23.95	1.03595	1.25	2.49605	0.75	3266	148.455	142	0.00215624
R=1110	unclass	unclass	unclass/unclass	R=1110#unclass/unclass	96	21	7	20	8.00837	7.2	1.10153	2.9	5.82575	0	2221	105.762	94	0.00146632	36	2.38e-05
R=1118	unclass	unclass	unclass/unclass	R=1118#unclass/unclass	217	15	4	15	13.5551	7.2	1.25026	0	3.04508	0	3128	208.533	216	0.00206513
R=1125	DNA	Maverick-Tlr	DNA/Maverick-Tlr	R=1125#DNA/Maverick-Tlr	789	48	5	46	19.5823	23.1	2.22826	0.35	0.96595	1.6	19263	401.312	359	0.0127176	6	3.96e-06
R=1128	unclass	unclass	unclass/unclass	R=1128#unclass/unclass	55	7	7	7	12.7286	10.9	0	0	0	0	385	55	55	0.00025418
R=1129	unclass	unclass	unclass/unclass	R=1129#unclass/unclass	118	8	7	8	0.310186	0	0	0	0	0	913	114.125	118	0.000602769
R=1130	unclass	unclass	unclass/unclass	R=1130#unclass/unclass	85	10	8	10	0.251232	0	0	0	0	0	812	81.2	85	0.000536088
R=1134	DNA	Maverick-Tlr	DNA/Maverick-Tlr	R=1134#DNA/Maverick-Tlr	402	13	8	13	7.28948	7	1.072	0	0.16441	0.2	4240	326.154	401	0.00279928
R=1136	DNA	Maverick	DNA/Maverick	R=1136#DNA/Maverick	368	27	2	26	21.7731	23	2.03677	1.4	1.59137	1.2	9085	336.481	243	0.00599798
R=114	unclass	unclass	unclass/unclass	R=114#unclass/unclass	158	47	5	47	15.1492	15.4	1.923	0.7	1.41188	1.3	6051	128.745	136	0.00399491
R=1142.chkTE	unclass	unclass	unclass/unclass	R=1142.chkTE#unclass/unclass	77	35	21	35	8.08813	8.2	0.641457	2.6	2.48134	0	2663	76.0857	78	0.00175813
R=1143.chkTE	unclass	unclass	unclass/unclass	R=1143.chkTE#unclass/unclass	63	93	6	93	11.6989	11.3	3.63731	0	0.889514	1.8	5293	56.914	56	0.00349448
R=1144	unclass	unclass	unclass/unclass	R=1144#unclass/unclass	71	13	2	13	7.34705	5.8	1.1238	0	0.73782	1.4	899	69.1538	69	0.000593526
R=1147	DNA	Merlin	DNA/Merlin	R=1147#DNA/Merlin	231	1	0	1	4.9	4.9	0	0	8.1	8.1	67	67	67	4.42e-05
R=1149	unclass	unclass	unclass/unclass	R=1149#unclass/unclass	205	266	1	254	13.4734	13	6.68496	1.4	3.63619	6.6	37851	142.297	118	0.0249895
R=1152	unclass	unclass	unclass/unclass	R=1152#unclass/unclass	67	18	14	18	6.50575	4.65	2.28301	0	0.793745	0	1183	65.7222	67	0.000781025
R=1153	unclass	unclass	unclass/unclass	R=1153#unclass/unclass	123	11	6	11	3.82898	3.2	0	0	0.323567	0	1256	114.182	123	0.00082922
R=1155	unclass	unclass	unclass/unclass	R=1155#unclass/unclass	282	48	8	40	21.949	24.45	1.35429	2.25	3.03002	1.05	18367	382.646	160.5	0.012126
R=1157	unclass	unclass	unclass/unclass	R=1157#unclass/unclass	347	30	13	27	13.9326	14.75	1.621	1.1	1.93259	0.6	8318	277.267	324	0.0054916
R=1162	unclass	unclass	unclass/unclass	R=1162#unclass/unclass	149	14	8	13	5.32789	5.05	2.52585	0	0.506179	0.3	1861	132.929	147.5	0.00122864
R=1168	unclass	unclass	unclass/unclass	R=1168#unclass/unclass	509	3	2	3	5.5363	2.4	0.0851635	0	0	0	1193	397.667	508	0.000787627
R=1171	unclass	unclass	unclass/unclass	R=1171#unclass/unclass	610	32	3	28	13.7874	15.1	1.38107	0	0.986646	0.45	7728	241.5	167	0.00510208
R=1175	unclass	unclass	unclass/unclass	R=1175#unclass/unclass	79	12	6	12	7.36963	5.55	2.25816	0	1.22666	0	889	74.0833	76.5	0.000586924
R=1179	unclass	unclass	unclass/unclass	R=1179#unclass/unclass	801	34	1	34	12.0432	10.4	1.93675	1.95	1.68126	1.6	21742	639.471	597.5	0.0143542
R=1183	unclass	unclass	unclass/unclass	R=1183#unclass/unclass	80	52	5	52	15.1643	15.4	3.87176	0	2.25284	2	5481	105.404	85	0.0036186
R=1189.H.Polinton	DNA	Maverick	DNA/Maverick	R=1189.H.Polinton#DNA/Maverick	218	27	3	27	14.3087	13.4	3.28119	0	2.77526	1.4	4656	172.444	191	0.00307392
R=1191	DNA	TcMar	DNA/TcMar	R=1191#DNA/TcMar	90	10	9	10	2.18788	0	0.108899	0	0.346496	0	899	89.9	90	0.000593526
R=1196	unclass	unclass	unclass/unclass	R=1196#unclass/unclass	82	23	20	23	6.84837	7.3	0.779775	0	0.0559551	0	1780	77.3913	82	0.00117517
R=12.TIR.TSD.C	DNA	MITE	DNA/MITE	R=12.TIR.TSD.C#DNA/MITE	698	451	21	417	4.21171	3.9	2.47778	0.8	1.88829	1.5	161020	357.029	297	0.106307	551	0.000363774
R=120.chkTE	unclass	unclass	unclass/unclass	R=120.chkTE#unclass/unclass	162	40	7	39	21.9569	20	1.59902	0	1.06333	1.2	4287	107.175	90	0.00283031
R=1200	unclass	unclass	unclass/unclass	R=1200#unclass/unclass	311	30	5	27	10.7434	14.05	2.7377	0	0.726511	1.4	4666	155.533	149	0.00308053	165	0.000108934
R=1205	unclass	unclass	unclass/unclass	R=1205#unclass/unclass	159	37	15	37	12.0053	8.6	1.40388	0	1.58187	0.6	5333	144.135	157	0.00352088
R=121	unclass	unclass	unclass/unclass	R=121#unclass/unclass	688	35	0	33	10.8589	10.2	2.24052	2.1	2.71028	1.4	8435	241	204	0.00556885
R=1212	unclass	unclass	unclass/unclass	R=1212#unclass/unclass	428	51	6	51	17.864	21.6	3.41805	1.3	2.87042	2.2	14178	278	313	0.00936042
R=1213	unclass	unclass	unclass/unclass	R=1213#unclass/unclass	84	26	12	26	15.7486	16.9	0.787482	1.2	1.04566	0	2037	78.3462	83.5	0.00134484
R=1214	unclass	unclass	unclass/unclass	R=1214#unclass/unclass	99	20	10	20	8.91711	7.8	0.172861	0	0.939705	0	1695	84.75	98	0.00111905
R=122.chkTE	DNA	TcMar	DNA/TcMar	R=122.chkTE#DNA/TcMar	100	50	10	50	12.2853	12.7	1.34309	0	1.05499	0.5	4521	90.42	98	0.0029848
R=1221	unclass	unclass	unclass/unclass	R=1221#unclass/unclass	204	45	14	45	13.279	12.8	3.60535	2.1	2.47786	2	8044	178.756	189	0.00531071
R=1223	unclass	unclass	unclass/unclass	R=1223#unclass/unclass	181	9	5	9	4.98256	3.3	1.69057	0	0.0610583	0	1474	163.778	179	0.000973145
R=1224	unclass	unclass	unclass/unclass	R=1224#unclass/unclass	68	29	10	29	11.6753	12.7	1.81371	0	0.392456	0	1816	62.6207	63	0.00119894
R=1227	unclass	unclass	unclass/unclass	R=1227#unclass/unclass	160	19	11	19	5.87721	5.9	0.192203	0	0.0386246	0	2501	131.632	159	0.00165118
R=1234	unclass	unclass	unclass/unclass	R=1234#unclass/unclass	216	6	6	6	2.72981	2.8	0.708929	0	0.0842391	0.25	1288	214.667	215.5	0.000850347
R=1238	unclass	unclass	unclass/unclass	R=1238#unclass/unclass	148	8	2	7	8.69265	8.3	2.19068	0.9	2.49967	1.25	912	114	108.5	0.000602109
R=1244	unclass	unclass	unclass/unclass	R=1244#unclass/unclass	69	12	8	12	2.59231	2.9	0.856532	0	1.50391	0	819	68.25	69	0.00054071
R=1245.chkTE	unclass	unclass	unclass/unclass	R=1245.chkTE#unclass/unclass	109	14	12	14	8.74778	9.15	2.51823	0	2.83044	1.45	1465	104.643	109	0.000967203
R=1247.H	DNA	hAT-Ac	DNA/hAT-Ac	R=1247.H#DNA/hAT-Ac	1584	19	3	17	12.7664	28	2.1865	3.4	2.21219	4	8496	447.158	276	0.00560912
R=125.chkTE	unclass	unclass	unclass/unclass	R=125.chkTE#unclass/unclass	332	62	25	58	16.7121	16.9	2.74422	0.9	1.42409	1.45	14770	238.226	293.5	0.00975126
R=1251	unclass	unclass	unclass/unclass	R=1251#unclass/unclass	124	23	6	23	10.3528	8.9	0.517821	0	1.06087	0	2497	108.565	123	0.00164854
R=1252	unclass	unclass	unclass/unclass	R=1252#unclass/unclass	82	15	9	15	7.74158	6.3	0.589966	0	1.30986	0	1176	78.4	81	0.000776403
R=1255	unclass	unclass	unclass/unclass	R=1255#unclass/unclass	54	12	6	12	7.52659	3.05	0	0	0.166395	0	613	51.0833	53.5	0.000404707
R=1256	DNA	TcMar	DNA/TcMar	R=1256#DNA/TcMar	312	16	1	16	18.1008	10.9	1.91742	2.5	2.16707	0.65	6205	387.812	244.5	0.00409658
R=1259	unclass	unclass	unclass/unclass	R=1259#unclass/unclass	54	312	257	312	18.4469	18.5	0.0182069	0	0.0698132	0	16653	53.375	54	0.0109944
R=126	unclass	unclass	unclass/unclass	R=126#unclass/unclass	222	35	11	35	13.622	12.3	3.01461	1.2	2.50572	0.5	4860	138.857	134	0.00320861	597	0.000394144
R=1263	unclass	unclass	unclass/unclass	R=1263#unclass/unclass	154	8	8	8	0	0	0	0	0	0	1232	154	154	0.000813375
R=1265	unclass	unclass	unclass/unclass	R=1265#unclass/unclass	75	5	5	5	4.32	2.7	0.52	0	0.52	0	375	75	75	0.000247578
R=1266	unclass	unclass	unclass/unclass	R=1266#unclass/unclass	78	6	4	6	0	0	0	0	0	0	454	75.6667	78	0.000299734
R=1267	unclass	unclass	unclass/unclass	R=1267#unclass/unclass	168	9	7	9	6.33564	5.4	0.815176	0	0.771138	0.6	1476	164	166	0.000974466
R=1269	unclass	unclass	unclass/unclass	R=1269#unclass/unclass	127	12	8	12	9.98688	5.5	0.979765	0	0.596084	0	1532	127.667	138.5	0.00101144
R=127.chkTE	unclass	unclass	unclass/unclass	R=127.chkTE#unclass/unclass	115	10	0	10	16.5511	16.5	3.18353	0.45	1.64625	3.6	759	75.9	81	0.000501097
R=1272	unclass	unclass	unclass/unclass	R=1272#unclass/unclass	50	2	2	2	8	8	0	0	0	0	100	50	50	6.6e-05
R=1273.chkTE	DNA	Maverick-Tlr	DNA/Maverick-Tlr	R=1273.chkTE#DNA/Maverick-Tlr	322	20	1	18	11.1869	13.75	1.80774	1.65	1.3437	0.45	3538	176.9	137	0.00233581
R=1277	unclass	unclass	unclass/unclass	R=1277#unclass/unclass	88	6	5	6	7.52	5.7	0.184615	0	0.184615	0	520	86.6667	88	0.000343308
R=1281	unclass	unclass	unclass/unclass	R=1281#unclass/unclass	82	24	15	24	4.31369	4.9	1.01995	0	0.169542	0	1855	77.2917	80	0.00122468
R=1283.chkTE	unclass	unclass	unclass/unclass	R=1283.chkTE#unclass/unclass	237	65	4	65	14.1739	16.8	1.73056	0.9	2.07741	0.8	6424	98.8308	89	0.00424117
R=1286	unclass	unclass	unclass/unclass	R=1286#unclass/unclass	66	12	12	12	6.05833	6.85	0	0	0	0	792	66	66	0.000522884
R=1290	unclass	unclass	unclass/unclass	R=1290#unclass/unclass	62	10	7	10	4.10586	3.35	0.483876	0	0.69772	0	614	61.4	62	0.000405367
R=1291.chkTE	unclass	unclass	unclass/unclass	R=1291.chkTE#unclass/unclass	185	7	0	7	3.68575	4	2.09065	2.8	2.94322	0.5	1284	183.429	186	0.000847706
R=1294	unclass	unclass	unclass/unclass	R=1294#unclass/unclass	286	8	5	8	5.66362	3.9	0.780767	0.15	0.324186	0.5	2059	257.375	284	0.00135937
R=1297	DNA	TcMar	DNA/TcMar	R=1297#DNA/TcMar	292	39	2	37	20.3714	23.2	3.11927	1.3	2.6344	2.4	5450	139.744	120	0.00359813
R=130	unclass	unclass	unclass/unclass	R=130#unclass/unclass	285	151	1	145	9.66339	9.8	3.70864	0.8	1.93601	1.4	30723	203.464	248	0.0202835
R=1304	unclass	unclass	unclass/unclass	R=1304#unclass/unclass	92	3	3	3	0	0	0	0	0	0	276	92	92	0.000182217
R=1306	DNA	TcMar	DNA/TcMar	R=1306#DNA/TcMar	303	5	5	5	1.25979	1.6	0.199272	0	0	0	1512	302.4	303	0.000998233
R=1308	unclass	unclass	unclass/unclass	R=1308#unclass/unclass	75	50	3	50	10.5275	9.5	0.909985	1.4	1.62958	0	3415	68.3	71	0.00225461
R=1321	unclass	unclass	unclass/unclass	R=1321#unclass/unclass	56	31	13	31	8.21011	7.3	1.85493	0	1.89538	0	1948	62.8387	55	0.00128608
R=1325	unclass	unclass	unclass/unclass	R=1325#unclass/unclass	56	19	8	19	15.2372	18.9	0.296252	0	0.395661	0	1014	53.3684	55	0.00066945
R=1334	unclass	unclass	unclass/unclass	R=1334#unclass/unclass	157	16	5	16	18.3149	26.3	0.864688	0	1.29819	0	1988	124.25	124	0.00131249
R=1338	unclass	unclass	unclass/unclass	R=1338#unclass/unclass	167	8	4	8	0.747731	0.65	0	0	0	0	1190	148.75	166.5	0.000785646
R=1339	unclass	unclass	unclass/unclass	R=1339#unclass/unclass	144	5	5	5	0.28	0	0	0	0	0	720	144	144	0.000475349
R=1340	unclass	unclass	unclass/unclass	R=1340#unclass/unclass	148	13	11	13	8.26917	7.4	2.02296	0	0.396958	0.7	1742	134	144	0.00115008
R=1341	DNA	MuDR	DNA/MuDR	R=1341#DNA/MuDR	213	5	4	5	5.6019	6.1	1.108	0	1.2198	0	1000	200	213	0.000660207
R=1342	DNA	Maverick-Tlr	DNA/Maverick-Tlr	R=1342#DNA/Maverick-Tlr	126	15	8	15	8.37363	7.2	0.778493	0	0.731774	0	1646	109.733	125	0.0010867
R=1347	unclass	unclass	unclass/unclass	R=1347#unclass/unclass	294	15	9	15	7.66908	6.7	0.947077	1.8	1.92221	0.9	3985	265.667	372	0.00263093
R=1348	DNA	TcMar	DNA/TcMar	R=1348#DNA/TcMar	333	10	4	10	4.40792	5	3.38686	0.5	0.49119	0.5	2815	281.5	316.5	0.00185848
R=135.chkTE	unclass	unclass	unclass/unclass	R=135.chkTE#unclass/unclass	621	45	0	44	12.9773	12.4	6.29997	0.9	2.35138	4.1	10210	226.889	223	0.00674071	20	1.32e-05
R=1357	unclass	unclass	unclass/unclass	R=1357#unclass/unclass	64	15	5	15	8.6854	7.9	0	0	1.86923	0	1014	67.6	64	0.00066945
R=1361	unclass	unclass	unclass/unclass	R=1361#unclass/unclass	54	2	0	2	6.6033	6.7	0	0	0	0	91	45.5	45.5	6.01e-05
R=1362	unclass	unclass	unclass/unclass	R=1362#unclass/unclass	93	19	6	19	8.40185	8.6	1.27206	0	0.594589	0	1571	82.6842	90	0.00103718
R=1363.chkTE	unclass	unclass	unclass/unclass	R=1363.chkTE#unclass/unclass	359	20	8	17	6.81425	7.25	3.11612	0.3	2.7149	1.95	4455	222.75	255	0.00294122
R=1365	unclass	unclass	unclass/unclass	R=1365#unclass/unclass	94	27	14	27	7.80106	6.8	5.5017	0	0.359118	4.5	2177	80.6296	88	0.00143727
R=1373	unclass	unclass	unclass/unclass	R=1373#unclass/unclass	163	4	4	4	1.35	1.2	0	0	0	0	652	163	163	0.000430455
R=1376.chkTE	unclass	unclass	unclass/unclass	R=1376.chkTE#unclass/unclass	91	22	5	22	9.50574	6.3	0.899886	0.3	1.13722	0	1760	80	74	0.00116196
R=1378	unclass	unclass	unclass/unclass	R=1378#unclass/unclass	82	9	4	9	15.2962	17.3	0	0	0.140171	0	702	78	82	0.000463465
R=1391	unclass	unclass	unclass/unclass	R=1391#unclass/unclass	55	23	17	23	4.41335	3.6	0.902913	0	0.511489	0	1236	53.7391	55	0.000816016
R=1392	unclass	unclass	unclass/unclass	R=1392#unclass/unclass	147	12	8	12	0.987265	0.35	0.148606	0	0	0	1327	110.583	147	0.000876095
R=1396	unclass	unclass	unclass/unclass	R=1396#unclass/unclass	93	3	0	3	17.75	17.2	1.12778	0	0	0	180	60	59	0.000118837
R=1397.chkTE	unclass	unclass	unclass/unclass	R=1397.chkTE#unclass/unclass	83	4	4	4	0	0	0	0	0	0	332	83	83	0.000219189
R=1401	DNA	TcMar	DNA/TcMar	R=1401#DNA/TcMar	142	9	7	9	7.08496	5.9	0.786772	0.7	1.95244	0	1270	141.111	142	0.000838463
R=1407	unclass	unclass	unclass/unclass	R=1407#unclass/unclass	166	3	3	3	0	0	0	0	0	0	498	166	166	0.000328783
R=1408	unclass	unclass	unclass/unclass	R=1408#unclass/unclass	121	10	7	10	1.36338	0.4	0.0872874	0	0.181289	0	1117	111.7	121	0.000737451
R=1409	unclass	unclass	unclass/unclass	R=1409#unclass/unclass	175	5	2	5	2.69712	1.8	0.500392	1.1	1.18497	0	765	153	174	0.000505058
R=141.chkTE	DNA?	Tlr?	DNA?/Tlr?	R=141.chkTE#DNA?/Tlr?	240	647	32	578	19.9088	20.8	2.82384	4.8	6.48613	1.9	79512	122.893	118	0.0524944
R=1410.check-RbtRNA-Pro-CCG	unclass	unclass	unclass/unclass	R=1410.check-RbtRNA-Pro-CCG#unclass/unclass	74	29	16	29	3.95872	1.4	0.0466954	0	0.0969828	0	2088	72	74	0.00137851
R=1411	unclass	unclass	unclass/unclass	R=1411#unclass/unclass	90	12	7	12	7.65216	7.9	0.554784	0	0.465385	0	1066	88.8333	89.5	0.000703781
R=1412	unclass	unclass	unclass/unclass	R=1412#unclass/unclass	118	5	5	5	0	0	0	0	0	0	590	118	118	0.000389522
R=1413	unclass	unclass	unclass/unclass	R=1413#unclass/unclass	125	7	4	7	4.53022	0.8	2.85136	0	0	0	771	110.143	125	0.00050902
R=1414	unclass	unclass	unclass/unclass	R=1414#unclass/unclass	72	8	5	8	4.09832	3.65	2.42164	0	0	0	536	67	70.5	0.000353871
R=1417	nonLTR	nonLTR	nonLTR/nonLTR	R=1417#nonLTR/nonLTR	149	6	4	6	2.94842	3.05	0	0	0	0	884	147.333	149	0.000583623
R=1418	unclass	unclass	unclass/unclass	R=1418#unclass/unclass	364	19	9	19	20.3987	26.9	3.21183	2.4	1.99856	2.8	6188	325.684	348	0.00408536
R=1419	unclass	unclass	unclass/unclass	R=1419#unclass/unclass	201	19	8	19	8.61135	5	0.813817	0	0.83407	0	3076	161.895	192	0.0020308
R=142	DNA	Maverick-Tlr	DNA/Maverick-Tlr	R=142#DNA/Maverick-Tlr	947	120	2	114	10.6676	8	2.94129	1.1	1.52229	2.15	61198	509.983	442	0.0404034
R=1422	unclass	unclass	unclass/unclass	R=1422#unclass/unclass	68	9	3	9	11.7333	11.3	0	0	0	0	579	64.3333	62	0.00038226
R=1423	unclass	unclass	unclass/unclass	R=1423#unclass/unclass	143	10	2	10	9.81827	9.4	1.97144	0	0.651791	0	1089	108.9	115	0.000718965
R=1426	unclass	unclass	unclass/unclass	R=1426#unclass/unclass	271	11	4	11	12.8704	23	2.46431	0.9	1.38042	2.9	2390	217.273	215	0.00157789
R=1427	unclass	unclass	unclass/unclass	R=1427#unclass/unclass	266	21	4	21	16.9693	22.2	0.463714	0	0.495848	0	3059	145.667	112	0.00201957
R=1431.chkTE	unclass	unclass	unclass/unclass	R=1431.chkTE#unclass/unclass	72	14	11	14	4.93877	5.6	0.202719	0	0	0	993	70.9286	72	0.000655586
R=1432	unclass	unclass	unclass/unclass	R=1432#unclass/unclass	124	9	6	9	3.50357	3.2	0.282546	0	0.501736	0	1037	115.222	124	0.000684635
R=1436	unclass	unclass	unclass/unclass	R=1436#unclass/unclass	119	29	18	29	7.01956	7.7	1.61085	0	1.5869	0	2976	102.621	115	0.00196478
R=1439	unclass	unclass	unclass/unclass	R=1439#unclass/unclass	116	17	10	17	4.10447	3.5	1.48797	0	0.392669	0	1746	102.706	115	0.00115272
R=1441	unclass	unclass	unclass/unclass	R=1441#unclass/unclass	240	14	5	14	15.9437	16	1.30453	0	1.4342	0.75	2696	192.571	235.5	0.00177992
R=1444	unclass	unclass	unclass/unclass	R=1444#unclass/unclass	50	13	8	13	7.47516	8.2	0.949682	0	0	0	628	48.3077	49	0.00041461
R=1446	unclass	unclass	unclass/unclass	R=1446#unclass/unclass	51	14	10	14	6.16713	5.9	0	0	1.3312	0	718	51.2857	51	0.000474029
R=1448	unclass	unclass	unclass/unclass	R=1448#unclass/unclass	319	14	5	13	13.6025	14.65	1.71501	2.7	2.6067	0.45	3211	229.357	214	0.00211992	4	2.64e-06
R=1449	unclass	unclass	unclass/unclass	R=1449#unclass/unclass	190	11	7	11	8.76938	6.4	0.376118	0	0.213467	0	1901	172.818	188	0.00125505
R=1459	unclass	unclass	unclass/unclass	R=1459#unclass/unclass	95	8	5	8	4.79376	0	0	0	0	0	753	94.125	95	0.000497136
R=1461	unclass	unclass	unclass/unclass	R=1461#unclass/unclass	137	36	13	36	11.1157	10.4	1.42963	15.7	13.5873	1.2	4813	133.694	143	0.00317758
R=1464	unclass	unclass	unclass/unclass	R=1464#unclass/unclass	122	16	10	16	10.393	6.6	1.11485	0.45	2.15314	0	1784	111.5	121	0.00117781
R=1466	unclass	unclass	unclass/unclass	R=1466#unclass/unclass	140	8	5	8	4.38876	0.7	0.298925	0	0	0	1023	127.875	140	0.000675392
R=1467	DNA	TcMar	DNA/TcMar	R=1467#DNA/TcMar	145	7	1	5	23.707	23.9	1.61388	2	1.96373	1.9	1657	236.714	302	0.00109396
R=1468	unclass	unclass	unclass/unclass	R=1468#unclass/unclass	113	12	7	12	6.69706	5.55	1.36255	0	0.284853	0	1327	110.583	112	0.000876095
R=147	unclass	unclass	unclass/unclass	R=147#unclass/unclass	81	40	2	40	13.954	11.85	3.94295	1.5	4.85757	1.25	3818	95.45	69	0.00252067
R=1473	unclass	unclass	unclass/unclass	R=1473#unclass/unclass	87	5	0	5	23.3442	25.4	0.557746	0	0.433803	0	355	71	59	0.000234374
R=1475	unclass	unclass	unclass/unclass	R=1475#unclass/unclass	228	4	3	4	4.08014	1.95	0.126097	0	0.462356	0	866	216.5	228	0.000571739
R=1482	unclass	unclass	unclass/unclass	R=1482#unclass/unclass	239	11	5	11	8.23085	5.4	0.626161	0.4	0.632108	0	2068	188	235	0.00136531
R=1485	unclass	unclass	unclass/unclass	R=1485#unclass/unclass	162	117	11	117	13.8876	15.1	1.86501	0.6	1.13084	1.1	15513	132.59	145	0.0102418
R=1488.chkTE	DNA	Maverick	DNA/Maverick	R=1488.chkTE#DNA/Maverick	273	11	0	7	21.0429	21.4	2.68455	2.2	1.86871	2.7	2531	230.091	174	0.00167098
R=1496	unclass	unclass	unclass/unclass	R=1496#unclass/unclass	98	10	6	10	6.63124	5.8	4.40795	0	0.216336	2.1	906	90.6	94	0.000598148
R=1497	unclass	unclass	unclass/unclass	R=1497#unclass/unclass	266	7	4	6	2.25299	2.3	0	0	0	0	1421	203	266	0.000938154
R=1499.chkTE	unclass	unclass	unclass/unclass	R=1499.chkTE#unclass/unclass	108	3	1	3	12.5878	14.3	0	0	0.36679	0	271	90.3333	92	0.000178916
R=150.chkTE	unclass	unclass	unclass/unclass	R=150.chkTE#unclass/unclass	110	43	3	43	9.04454	8.9	1.95281	0	1.04513	1	4192	97.4884	100	0.00276759
R=1508	unclass	unclass	unclass/unclass	R=1508#unclass/unclass	64	23	11	23	11.2929	9.5	2.01938	0	0.493228	0	1388	60.3478	63	0.000916367
R=1514	unclass	unclass	unclass/unclass	R=1514#unclass/unclass	98	12	11	12	6.10647	5.6	1.61671	0	0.944474	0	1113	92.75	98	0.00073481
R=152	unclass	unclass	unclass/unclass	R=152#unclass/unclass	102	6	0	6	7.94798	7.45	0.951056	1.7	1.77889	0.5	521	86.8333	84.5	0.000343968
R=1520	unclass	unclass	unclass/unclass	R=1520#unclass/unclass	84	11	9	11	5.83112	6	0.75963	0	1.14973	0	919	83.5455	83	0.00060673
R=153.H	DNA	TcMar	DNA/TcMar	R=153.H#DNA/TcMar	488	87	9	87	12.6908	12.4	3.97013	0.9	2.01279	1.9	19058	219.057	148	0.0125822
R=1530	unclass	unclass	unclass/unclass	R=1530#unclass/unclass	116	22	7	22	9.06317	9	2.27242	0.9	1.73452	0	2335	106.136	112.5	0.00154158
R=1534	unclass	unclass	unclass/unclass	R=1534#unclass/unclass	118	15	9	15	5.26938	3.7	1.27661	0	0.796315	0	1411	94.0667	115	0.000931552
R=1535	unclass	unclass	unclass/unclass	R=1535#unclass/unclass	357	7	2	7	6.73999	5.8	0.90078	4.9	5.7292	0.2	2308	329.714	358	0.00152376
R=1538	unclass	unclass	unclass/unclass	R=1538#unclass/unclass	52	20	12	20	15.6577	15.3	0.413665	0	0.208799	0	966	48.3	52	0.00063776
R=1542	unclass	unclass	unclass/unclass	R=1542#unclass/unclass	118	40	15	40	11.3665	9.45	2.89589	1.75	1.83205	1.8	3897	97.425	110.5	0.00257283
R=1545.check-RbATCOPIA38A_I	unclass	unclass	unclass/unclass	R=1545.check-RbATCOPIA38A_I#unclass/unclass	997	10	6	10	5.01214	4.35	0.302772	0.05	0.247962	0	7214	721.4	989.5	0.00476273	14	9.24e-06
R=155	LINE	L1-outcast	LINE/L1-outcast	R=155#LINE/L1-outcast	255	87	2	86	8.41952	7.4	2.69831	0.8	2.0243	0.9	14603	167.851	178	0.009641	44	2.9e-05
R=1550	unclass	unclass	unclass/unclass	R=1550#unclass/unclass	85	9	4	9	1.67523	0	0	0	0	0	642	71.3333	78	0.000423853
R=1551	DNA	Maverick	DNA/Maverick	R=1551#DNA/Maverick	154	5	0	5	9.22159	9.6	1.91962	0.8	10.8644	2.3	1167	233.4	272	0.000770462
R=1552	unclass	unclass	unclass/unclass	R=1552#unclass/unclass	145	12	8	12	4.07001	4.85	1.84232	0	0.342192	0.7	1524	127	143	0.00100616
R=1555	unclass	unclass	unclass/unclass	R=1555#unclass/unclass	153	40	11	40	15.2688	14.55	2.27203	0	1.08073	0.7	5241	131.025	143.5	0.00346014
R=1557	unclass	unclass	unclass/unclass	R=1557#unclass/unclass	78	9	8	9	0	0	0	0	0	0	694	77.1111	78	0.000458184
R=1559.chkTE	unclass	unclass	unclass/unclass	R=1559.chkTE#unclass/unclass	255	30	11	28	6.46086	5.3	3.45696	0.5	1.04692	1.35	6255	208.5	253.5	0.00412959
R=156	unclass	unclass	unclass/unclass	R=156#unclass/unclass	323	175	0	169	16.1628	15.7	3.4601	2.5	4.03641	1.8	26707	152.611	125	0.0176321	248	0.000163731
R=1561	DNA	Maverick	DNA/Maverick	R=1561#DNA/Maverick	107	9	5	9	15.2904	13.2	1.68484	1.4	2.41948	0.9	1920	213.333	207	0.0012676
R=1563	DNA	TcMar	DNA/TcMar	R=1563#DNA/TcMar	276	14	6	14	15.7197	17.15	1.7022	1.65	1.76289	1.85	3449	246.357	265	0.00227705
R=1564	unclass	unclass	unclass/unclass	R=1564#unclass/unclass	262	7	7	7	3.74966	2.7	3.19944	0	0.386211	0.4	1784	254.857	261	0.00117781
R=1565	unclass	unclass	unclass/unclass	R=1565#unclass/unclass	330	21	8	21	6.73985	5.8	3.40642	0.6	1.1855	2.3	6530	310.952	368	0.00431115
R=1566	unclass	unclass	unclass/unclass	R=1566#unclass/unclass	245	8	6	8	6.06804	4.3	0.114095	0.65	0.772031	0	1802	225.25	245	0.00118969
R=1571	unclass	unclass	unclass/unclass	R=1571#unclass/unclass	134	14	2	13	8.62797	7.65	3.59679	0.6	1.04706	1.7	1838	131.286	138.5	0.00121346
R=1572	unclass	unclass	unclass/unclass	R=1572#unclass/unclass	56	32	16	32	7.9789	7.95	2.28231	0	3.75349	0	1735	54.2188	55	0.00114546
R=1574	unclass	unclass	unclass/unclass	R=1574#unclass/unclass	73	33	8	33	12.7702	15.1	1.12542	0	0.643515	0	2128	64.4848	68	0.00140492
R=1577.chkTE	unclass	unclass	unclass/unclass	R=1577.chkTE#unclass/unclass	279	6	3	6	2.25424	1.95	0	0	0.0960452	0	1062	177	190.5	0.00070114
R=1578	unclass	unclass	unclass/unclass	R=1578#unclass/unclass	100	9	4	9	13.6189	14.3	2.8951	1.4	1.79006	2.4	1448	160.889	130	0.00095598
R=1581.chkTE	DNA	Maverick-Tlr	DNA/Maverick-Tlr	R=1581.chkTE#DNA/Maverick-Tlr	101	9	6	9	3.68871	3.3	0.119156	0	0.119156	0	877	97.4444	101	0.000579002
R=1583	unclass	unclass	unclass/unclass	R=1583#unclass/unclass	227	12	5	12	11.5829	8.7	2.42222	0.4	1.11064	1.5	2219	184.917	188.5	0.001465
R=1589	DNA	TcMar	DNA/TcMar	R=1589#DNA/TcMar	160	10	6	10	12.3572	8.25	0.988092	0	0.710526	0.9	1520	152	159	0.00100351
R=1593.chkTE	unclass	unclass	unclass/unclass	R=1593.chkTE#unclass/unclass	118	4	3	4	3.54493	1.65	0.440529	0	0.440529	0	454	113.5	118	0.000299734
R=1595	unclass	unclass	unclass/unclass	R=1595#unclass/unclass	83	8	5	8	10.1666	7.45	0	0	1.00155	0	644	80.5	83	0.000425173
R=1597	DNA	TcMar	DNA/TcMar	R=1597#DNA/TcMar	601	10	1	10	17.6936	25.85	2.15479	2.95	1.60066	1.25	5454	545.4	246	0.00360077
R=16.chkTE	DNA	MITE	DNA/MITE	R=16.chkTE#DNA/MITE	497	116	1	115	9.20583	8.6	3.34513	1.35	3.86967	0.85	19644	169.345	161	0.0129691
R=160	unclass	unclass	unclass/unclass	R=160#unclass/unclass	510	6	0	6	8.64353	8.15	3.27351	2.9	7.63073	3.5	1344	224	206.5	0.000887318
R=1600.chkTE	unclass	unclass	unclass/unclass	R=1600.chkTE#unclass/unclass	125	12	8	12	6.29668	5.8	5.93042	0	0.983671	3.35	1384	115.333	120.5	0.000913727
R=1601	unclass	unclass	unclass/unclass	R=1601#unclass/unclass	151	9	4	9	0	0	0	0	0	0	987	109.667	149	0.000651624
R=1604.chkTE	unclass	unclass	unclass/unclass	R=1604.chkTE#unclass/unclass	162	6	3	6	0.493902	0	0	0	0	0	820	136.667	161.5	0.00054137
R=1608	unclass	unclass	unclass/unclass	R=1608#unclass/unclass	130	12	6	11	6.87404	6.8	1.24576	1.15	1.53169	0	1379	114.917	127.5	0.000910426
R=161	DNA	Tlr?	DNA/Tlr?	R=161#DNA/Tlr?	183	331	10	307	16.6172	20.7	5.56862	2.1	3.92412	6.2	28270	85.4079	79	0.0186641
R=1611	unclass	unclass	unclass/unclass	R=1611#unclass/unclass	65	6	5	6	1.79173	0.8	0.242105	0	2.96867	0	399	66.5	65	0.000263423
R=1613	unclass	unclass	unclass/unclass	R=1613#unclass/unclass	170	6	4	6	4.51437	2.4	1.54798	0.5	0.798178	1.4	988	164.667	190	0.000652285
R=1614	unclass	unclass	unclass/unclass	R=1614#unclass/unclass	211	9	6	9	3.58884	3.6	0.32706	0	0.259831	0	1541	171.222	211	0.00101738
R=1615	unclass	unclass	unclass/unclass	R=1615#unclass/unclass	56	6	3	6	9.23516	7.95	0.330968	0	1.37419	0	310	51.6667	55	0.000204664
R=1617	unclass	unclass	unclass/unclass	R=1617#unclass/unclass	138	37	0	37	21.2756	22.3	1.33908	0.9	2.11323	0.4	5428	146.703	105	0.0035836
R=1620	unclass	unclass	unclass/unclass	R=1620#unclass/unclass	121	14	2	9	19.0715	21.7	2.77249	3.2	2.69846	2.4	2654	189.571	149	0.00175219
R=1621	unclass	unclass	unclass/unclass	R=1621#unclass/unclass	78	17	14	17	8.65679	9	0.222836	1.3	1.54612	0	1340	78.8235	79	0.000884677
R=1627	unclass	unclass	unclass/unclass	R=1627#unclass/unclass	301	16	6	15	8.87066	7.35	4.71546	1	1.24295	1.55	2924	182.75	155.5	0.00193045
R=1628	unclass	unclass	unclass/unclass	R=1628#unclass/unclass	123	6	5	6	3.95693	3.3	0.966529	0	0	0	729	121.5	122	0.000481291
R=163.chkTE	unclass	unclass	unclass/unclass	R=163.chkTE#unclass/unclass	85	40	2	40	11.2171	10.4	1.10961	0	2.00757	0	2538	63.45	61	0.00167561
R=1632	unclass	unclass	unclass/unclass	R=1632#unclass/unclass	155	6	4	6	4.97964	3.55	0	0	0.671077	0	771	128.5	155	0.00050902
R=1636	unclass	unclass	unclass/unclass	R=1636#unclass/unclass	340	12	3	12	11.4678	18.7	3.19921	3.35	2.13791	2.6	2532	211	180	0.00167164
R=1639	DNA	TcMar	DNA/TcMar	R=1639#DNA/TcMar	196	5	5	5	12.8003	10.5	1.97412	0	1.21224	0	1569	313.8	275	0.00103586
R=1645	unclass	unclass	unclass/unclass	R=1645#unclass/unclass	77	5	4	5	1.44578	0	0.250639	0	0.198721	0	391	78.2	77	0.000258141
R=1650	unclass	unclass	unclass/unclass	R=1650#unclass/unclass	111	10	5	10	10.9358	9.7	0.268937	0	0.268937	0	1101	110.1	110.5	0.000726888
R=1653	unclass	unclass	unclass/unclass	R=1653#unclass/unclass	149	5	4	5	2.18649	2	0.418108	0	0.281892	0.7	740	148	149	0.000488553
R=166	DNA	TcMar	DNA/TcMar	R=166#DNA/TcMar	207	142	11	139	11.0821	11.25	2.4917	0.5	1.94087	0.6	21919	154.359	164	0.0144711	198	0.000130721
R=1667	unclass	unclass	unclass/unclass	R=1667#unclass/unclass	132	6	3	6	7.1	7.55	0.150456	0	1.54103	0	658	109.667	131	0.000434416
R=167.small.chkTE	unclass	unclass	unclass/unclass	R=167.small.chkTE#unclass/unclass	185	124	26	124	18.1658	17.9	3.11422	2.3	3.15737	2.7	17476	140.935	137.5	0.0115378
R=1670	unclass	unclass	unclass/unclass	R=1670#unclass/unclass	98	4	4	4	1.28801	0	0.247449	0	0.252551	0	392	98	98	0.000258801
R=1672	unclass	unclass	unclass/unclass	R=1672#unclass/unclass	60	2	1	2	8.57227	8.65	0.833613	8.95	10.4126	2.5	119	59.5	59.5	7.86e-05
R=1676	unclass	unclass	unclass/unclass	R=1676#unclass/unclass	60	12	9	12	6.42006	6.7	0	0	0.147511	0	703	58.5833	60	0.000464126
R=1682	unclass	unclass	unclass/unclass	R=1682#unclass/unclass	119	7	5	7	7.95888	6.8	0.111561	0	1.12765	0	839	119.857	119	0.000553914
R=1684	unclass	unclass	unclass/unclass	R=1684#unclass/unclass	132	8	7	8	4.52773	3.1	0.597497	0	0.412513	0	999	124.875	132	0.000659547
R=1685	LINE	L1?	LINE/L1?	R=1685#LINE/L1?	261	2	0	2	1.9	1.9	0	1.2	2.4	1.2	426	213	213	0.000281248
R=1686	unclass	unclass	unclass/unclass	R=1686#unclass/unclass	114	12	8	12	5.96124	3.05	0.74986	0	0.434707	0.15	1432	119.333	124	0.000945417
R=1687	DNA	TcMar	DNA/TcMar	R=1687#DNA/TcMar	121	15	6	15	7.56162	6.6	0.528021	0	1.01773	0	1506	100.4	115	0.000994272
R=1692	unclass	unclass	unclass/unclass	R=1692#unclass/unclass	187	23	9	23	10.0745	8.4	4.28156	2.1	2.46048	1.9	3806	165.478	183	0.00251275
R=1698	DNA	TcMar	DNA/TcMar	R=1698#DNA/TcMar	182	16	6	16	12.5875	15.55	0.648315	0	0.754281	0	2196	137.25	122	0.00144981
R=1703	unclass	unclass	unclass/unclass	R=1703#unclass/unclass	53	11	7	11	9.0423	5.7	0	0	0	0	565	51.3636	53	0.000373017
R=1706.chkTE	unclass	unclass	unclass/unclass	R=1706.chkTE#unclass/unclass	165	7	5	7	0.452	0	0	0	0.577579	0	950	135.714	165	0.000627197
R=1707	unclass	unclass	unclass/unclass	R=1707#unclass/unclass	637	16	4	15	6.72425	6	0.838035	0	0.43339	0.25	4672	292	193.5	0.00308449	6	3.96e-06
R=171.chkTE	DNA	TcMar	DNA/TcMar	R=171.chkTE#DNA/TcMar	1460	191	1	182	9.93096	13.2	2.57221	1.2	1.57505	2.7	67944	355.728	206	0.0448571	995	0.000656906
R=1710	unclass	unclass	unclass/unclass	R=1710#unclass/unclass	270	16	8	16	14.1344	12.85	0.599881	0.4	1.2373	0.2	4212	263.25	270	0.00278079
R=1711	unclass	unclass	unclass/unclass	R=1711#unclass/unclass	138	9	6	9	7.6657	1.4	0.185623	0	1.03312	0	1099	122.111	138	0.000725568
R=1714	unclass	unclass	unclass/unclass	R=1714#unclass/unclass	57	12	9	12	3.27584	2.65	0	0	0.932943	0	683	56.9167	57	0.000450921
R=1720	unclass	unclass	unclass/unclass	R=1720#unclass/unclass	57	3	2	3	4.20714	1.9	0	0	0	0	168	56	57	0.000110915
R=1721.chkTE	unclass	unclass	unclass/unclass	R=1721.chkTE#unclass/unclass	175	11	6	11	9.01049	1.9	1.51818	0	0.347378	0	1716	156	171	0.00113291
R=1722	unclass	unclass	unclass/unclass	R=1722#unclass/unclass	349	60	4	60	8.7843	7.7	2.93287	0	1.7673	0.25	6027	100.45	53.5	0.00397907
R=1724	unclass	unclass	unclass/unclass	R=1724#unclass/unclass	109	7	4	7	8.43958	3.1	0	0	0	0	768	109.714	124	0.000507039
R=173	unclass	unclass	unclass/unclass	R=173#unclass/unclass	337	48	3	48	16.5688	16.9	4.66908	1.45	1.9661	4.1	13969	291.021	309	0.00922243
R=1730	unclass	unclass	unclass/unclass	R=1730#unclass/unclass	80	4	4	4	0	0	0	0	0	0	320	80	80	0.000211266
R=1738	unclass	unclass	unclass/unclass	R=1738#unclass/unclass	90	18	10	18	6.49519	6.75	0.94519	0	1.65752	0	1476	82	89	0.000974466
R=174	unclass	unclass	unclass/unclass	R=174#unclass/unclass	182	25	0	25	2.17828	2.7	0.371473	0.7	0.484715	0	3232	129.28	150	0.00213379
R=1742	unclass	unclass	unclass/unclass	R=1742#unclass/unclass	81	87	14	86	16.4203	16.2	1.92799	0	1.44008	1.3	7178	82.5057	76	0.00473897	5	3.3e-06
R=1743	unclass	unclass	unclass/unclass	R=1743#unclass/unclass	53	12	0	12	13.6637	14.3	0	0	0	0	600	50	49	0.000396124
R=1748	unclass	unclass	unclass/unclass	R=1748#unclass/unclass	121	10	9	10	8.21334	7.1	1.16972	0.4	0.398999	0	1199	119.9	121	0.000791588
R=1749	unclass	unclass	unclass/unclass	R=1749#unclass/unclass	85	11	3	11	8.34371	7.7	2.45827	0	0	0	707	64.2727	65	0.000466766
R=175	unclass	unclass	unclass/unclass	R=175#unclass/unclass	316	26	3	26	21.4558	21.45	3.20194	1.6	2.22023	2.6	6037	232.192	298.5	0.00398567
R=1753	unclass	unclass	unclass/unclass	R=1753#unclass/unclass	79	2	0	2	0	0	0	0	0	0	130	65	65	8.58e-05
R=1756	DNA	MuDR	DNA/MuDR	R=1756#DNA/MuDR	107	10	1	10	22.4377	26.2	0.199011	0	0.854635	0	809	80.9	73.5	0.000534108
R=176	unclass	unclass	unclass/unclass	R=176#unclass/unclass	342	55	4	51	14.2223	14.3	3.41261	2	5.08049	2.4	8627	156.855	143	0.00569561
R=1761	unclass	unclass	unclass/unclass	R=1761#unclass/unclass	57	32	18	32	7.40222	7.1	0.170227	0	0.300909	0	1760	55	56.5	0.00116196
R=1763	unclass	unclass	unclass/unclass	R=1763#unclass/unclass	176	7	6	7	2.83488	2.8	0.0936664	0	0	0	1121	160.143	176	0.000740092
R=1768	unclass	unclass	unclass/unclass	R=1768#unclass/unclass	166	5	4	5	3.37546	3.6	0.120292	0	0	0	823	164.6	166	0.00054335
R=177	unclass	unclass	unclass/unclass	R=177#unclass/unclass	254	44	2	43	9.66271	4.55	5.22052	0	1.47762	0	7807	177.432	184.5	0.00515424
R=1772	unclass	unclass	unclass/unclass	R=1772#unclass/unclass	206	8	6	8	4.96338	4.15	0.328655	0	0.948499	0.5	1532	191.5	205	0.00101144
R=1775	DNA	TcMar	DNA/TcMar	R=1775#DNA/TcMar	220	6	4	6	3.73021	2.5	0.638308	0	0.100546	0	1099	183.167	219.5	0.000725568
R=1781	unclass	unclass	unclass/unclass	R=1781#unclass/unclass	183	17	6	17	18.2884	17	1.17262	0	1.59871	0.5	2480	145.882	182	0.00163731
R=1782	unclass	unclass	unclass/unclass	R=1782#unclass/unclass	81	11	10	11	5.27717	4.9	0.115523	0	0	0	889	80.8182	81	0.000586924
R=1783	unclass	unclass	unclass/unclass	R=1783#unclass/unclass	98	5	4	5	3.9456	3.5	1.08151	1.8	1.82639	0	557	111.4	117	0.000367735
R=1785	unclass	unclass	unclass/unclass	R=1785#unclass/unclass	71	51	5	51	13.5	15.4	1.76676	0	1.02978	1.4	3321	65.1176	65	0.00219255
R=1786.dim.domain	DNA	hAT-Ac	DNA/hAT-Ac	R=1786.dim.domain#DNA/hAT-Ac	230	13	7	13	3.78335	3	0.394406	0.4	1.19069	0	2288	176	230	0.00151055
R=1788	unclass	unclass	unclass/unclass	R=1788#unclass/unclass	68	10	7	10	7.01707	6.65	1.04521	0	0	0	668	66.8	68	0.000441018
R=1789	unclass	unclass	unclass/unclass	R=1789#unclass/unclass	156	8	5	8	0	0	0.0959087	0	0	0	1051	131.375	156	0.000693878
R=1792	unclass	unclass	unclass/unclass	R=1792#unclass/unclass	228	5	4	5	1.62813	1.8	2.59243	0	0	0	1109	221.8	227	0.00073217
R=1794	unclass	unclass	unclass/unclass	R=1794#unclass/unclass	100	5	5	5	3.8	3	0	0	0	0	500	100	100	0.000330104
R=1796	unclass	unclass	unclass/unclass	R=1796#unclass/unclass	175	6	4	6	4.00814	3.15	0	0	1.16307	0	1056	176	175.5	0.000697179
R=1799	DNA	TcMar	DNA/TcMar	R=1799#DNA/TcMar	198	16	4	16	16.1	24.8	1.47547	0.55	1.398	1.2	2303	143.938	155.5	0.00152046	6	3.96e-06
R=18.chkTE	unclass	unclass	unclass/unclass	R=18.chkTE#unclass/unclass	564	71	0	71	13.7311	12.8	5.48636	2.6	4.06473	3.6	15943	224.549	206	0.0105257
R=1804	unclass	unclass	unclass/unclass	R=1804#unclass/unclass	159	93	21	92	9.21095	9.6	3.80311	0.7	1.80506	2.1	11986	128.882	139	0.00791324
R=1806	unclass	unclass	unclass/unclass	R=1806#unclass/unclass	170	6	6	6	2.36761	2.4	0	0	0.507512	0	1025	170.833	170	0.000676712
R=1807	unclass	unclass	unclass/unclass	R=1807#unclass/unclass	101	23	7	23	5.76284	5.9	0.0838193	0	1.18937	0	1749	76.0435	74	0.0011547	23	1.52e-05
R=1810	unclass	unclass	unclass/unclass	R=1810#unclass/unclass	63	24	4	24	11.8154	12.6	1.02062	0	1.33558	0	1377	57.375	57	0.000909105
R=1813	unclass	unclass	unclass/unclass	R=1813#unclass/unclass	50	16	14	16	6.14329	6.1	0.37591	0	1.50565	0	797	49.8125	50	0.000526185
R=1817	unclass	unclass	unclass/unclass	R=1817#unclass/unclass	167	11	8	11	7.37845	4.2	0.302495	0	0.0614729	0	1643	149.364	167	0.00108472
R=1818	DNA	TcMar	DNA/TcMar	R=1818#DNA/TcMar	306	3	0	3	27.8389	27	2.1991	3.7	3.50538	1.6	781	260.333	299	0.000515622
R=1824	unclass	unclass	unclass/unclass	R=1824#unclass/unclass	143	8	7	8	9.84515	6.3	0.739835	0	0.275	0.35	1092	136.5	143	0.000720946
R=1826	DNA	Merlin	DNA/Merlin	R=1826#DNA/Merlin	103	8	6	8	1.55992	1.45	0.128851	0	0	0	766	95.75	103	0.000505719
R=1829.chkTE	unclass	unclass	unclass/unclass	R=1829.chkTE#unclass/unclass	80	61	35	61	7.93549	7.5	1.42573	1.2	1.288	0	4618	75.7049	80	0.00304884
R=1840	unclass	unclass	unclass/unclass	R=1840#unclass/unclass	51	5	4	5	0.437768	0	0	0	0	0	233	46.6	51	0.000153828
R=1844	unclass	unclass	unclass/unclass	R=1844#unclass/unclass	112	8	8	8	0.225	0	0	0	0	0	896	112	112	0.000591546
R=1845	unclass	unclass	unclass/unclass	R=1845#unclass/unclass	50	23	13	23	10.1882	12	0	0	0.702456	0	1140	49.5652	50	0.000752636
R=1846	unclass	unclass	unclass/unclass	R=1846#unclass/unclass	84	14	4	14	7.17831	7.45	0	0	0.758264	0	968	69.1429	77.5	0.00063908
R=1847	unclass	unclass	unclass/unclass	R=1847#unclass/unclass	123	36	8	36	13.7433	17	2.20306	0	1.08803	1.65	3593	99.8056	100	0.00237212
R=1848	unclass	unclass	unclass/unclass	R=1848#unclass/unclass	206	20	9	20	8.95508	8.5	1.31149	0	0.806158	0.5	3751	187.55	203	0.00247644
R=1850	unclass	unclass	unclass/unclass	R=1850#unclass/unclass	262	9	4	8	5.45717	4.3	2.89346	0.4	1.17748	0	2127	236.333	247	0.00140426
R=1862	unclass	unclass	unclass/unclass	R=1862#unclass/unclass	111	34	7	34	15.3411	17.1	6.14647	2.65	3.84011	1.25	4375	128.676	110.5	0.00288841
R=1863	LINE	L1-outcast	LINE/L1-outcast	R=1863#LINE/L1-outcast	204	30	9	30	15.1533	15.05	2.36326	1.55	2.47143	1.2	5043	168.1	187.5	0.00332942
R=1869	unclass	unclass	unclass/unclass	R=1869#unclass/unclass	165	17	6	17	12.8374	25.6	1.39075	0	1.00392	0	2702	158.941	94	0.00178388
R=1872	unclass	unclass	unclass/unclass	R=1872#unclass/unclass	123	16	4	16	16.9417	14.5	0.79703	0	0.988978	0.4	1751	109.438	121.5	0.00115602
R=1873	unclass	unclass	unclass/unclass	R=1873#unclass/unclass	64	3	3	3	3.14124	3.1	0	0	1.07216	0	194	64.6667	65	0.00012808
R=1875.chkTE	unclass	unclass	unclass/unclass	R=1875.chkTE#unclass/unclass	184	8	2	8	7.34249	6.55	2.2186	0	0.510372	0.25	1398	174.75	180.5	0.000922969
R=1876	unclass	unclass	unclass/unclass	R=1876#unclass/unclass	62	3	2	3	5.95459	6.5	0	0	0	0	185	61.6667	62	0.000122138
R=188.chkTE	unclass	unclass	unclass/unclass	R=188.chkTE#unclass/unclass	218	25	6	25	2.82807	0	2.71818	0	0.134392	0	3905	156.2	169	0.00257811
R=1884	unclass	unclass	unclass/unclass	R=1884#unclass/unclass	186	6	5	6	2.57176	1.35	0.169104	0	1.18355	0	1094	182.333	185.5	0.000722267
R=1886	DNA	TcMar	DNA/TcMar	R=1886#DNA/TcMar	102	12	3	7	19.1465	19.6	4.35564	1.4	1.83085	4.25	940	78.3333	20	0.000620595
R=1892	unclass	unclass	unclass/unclass	R=1892#unclass/unclass	157	44	24	44	18.3211	18.5	0.503086	0	0.356647	0	6514	148.045	156	0.00430059
R=1894	unclass	unclass	unclass/unclass	R=1894#unclass/unclass	133	5	4	5	4.85189	4.6	0.455656	0	0.471795	0	663	132.6	132	0.000437717
R=1896.chkTE	unclass	unclass	unclass/unclass	R=1896.chkTE#unclass/unclass	300	17	5	17	9.21007	8.4	1.9128	1.4	2.00097	0.7	4023	236.647	292	0.00265601
R=1897.chkTE	unclass	unclass	unclass/unclass	R=1897.chkTE#unclass/unclass	212	53	6	53	23.6209	25.3	2.45727	1.6	2.02713	1.9	7935	149.717	147	0.00523874
R=1901	unclass	unclass	unclass/unclass	R=1901#unclass/unclass	141	6	5	6	0	0	0	0	0	0	795	132.5	141	0.000524865
R=1906.check-RbMariner-7_DRh	DNA	TcMar	DNA/TcMar	R=1906.check-RbMariner-7_DRh#DNA/TcMar	172	4	2	4	14.8487	16.25	0.164952	0.3	0.824277	0	622	155.5	156	0.000410649
R=1907	unclass	unclass	unclass/unclass	R=1907#unclass/unclass	83	7	7	7	5.5	4.8	0	0	0	0	581	83	83	0.00038358
R=1908	unclass	unclass	unclass/unclass	R=1908#unclass/unclass	91	8	4	8	7.23929	7.2	0.564965	0	0.143546	0	705	88.125	89	0.000465446
R=191.chkTE	unclass	unclass	unclass/unclass	R=191.chkTE#unclass/unclass	185	76	22	76	10.5908	9.3	4.14764	0.5	2.71449	1.9	10387	136.671	161.5	0.00685757	106	7e-05
R=1914	unclass	unclass	unclass/unclass	R=1914#unclass/unclass	66	14	11	14	7.29795	7.75	1.93129	0	0.225256	0	879	62.7857	66	0.000580322
R=1919	unclass	unclass	unclass/unclass	R=1919#unclass/unclass	119	21	16	21	10.6523	11.8	0.667965	0	0.906755	0	2413	114.905	119	0.00159308
R=1923.chkTE	DNA	Merlin	DNA/Merlin	R=1923.chkTE#DNA/Merlin	190	15	9	15	10.2737	10.5	0.434567	0.2	0.994538	0.2	2728	181.867	193	0.00180105
R=1926	unclass	unclass	unclass/unclass	R=1926#unclass/unclass	92	10	7	10	6.59786	2.2	3.20678	0	0.239715	0	841	84.1	92	0.000555234
R=1933	unclass	unclass	unclass/unclass	R=1933#unclass/unclass	143	16	9	16	11.2724	13.05	0.437702	0	0.510024	0	2045	127.812	142	0.00135012
R=1935	DNA	Merlin	DNA/Merlin	R=1935#DNA/Merlin	133	6	3	6	3.20558	2.35	0	0	0	0	789	131.5	131.5	0.000520903
R=1938	unclass	unclass	unclass/unclass	R=1938#unclass/unclass	257	26	5	25	6.49899	8	1.06378	0	1.07922	0.55	3581	137.731	143	0.0023642
R=1939	unclass	unclass	unclass/unclass	R=1939#unclass/unclass	79	6	5	6	2.34255	1.9	0.425957	0	0	0	470	78.3333	79	0.000310297
R=1951	unclass	unclass	unclass/unclass	R=1951#unclass/unclass	57	4	4	4	0.45	0	0	0	0	0	228	57	57	0.000150527
R=1956	unclass	unclass	unclass/unclass	R=1956#unclass/unclass	295	6	3	6	6.74111	7.1	2.11326	0.7	1.61185	2.25	1569	261.5	294.5	0.00103586
R=1970	unclass	unclass	unclass/unclass	R=1970#unclass/unclass	94	6	6	6	0.534336	0	0.345664	0.55	0.550973	0	565	94.1667	94	0.000373017
R=1971	unclass	unclass	unclass/unclass	R=1971#unclass/unclass	116	30	6	30	17.3112	23.5	0.231004	0	0.0380711	0	2561	85.3667	73	0.00169079
R=1980	unclass	unclass	unclass/unclass	R=1980#unclass/unclass	71	17	7	16	11.1346	12.5	1.14988	2.9	5.21353	0	1279	75.2353	71	0.000844405
R=1988	unclass	unclass	unclass/unclass	R=1988#unclass/unclass	91	6	4	6	0	0	0	0	0	0	519	86.5	91	0.000342647
R=1989	unclass	unclass	unclass/unclass	R=1989#unclass/unclass	172	6	3	6	4.32794	3.5	0.629077	0	0.500126	0	791	131.833	163.5	0.000522224
R=1994	unclass	unclass	unclass/unclass	R=1994#unclass/unclass	87	8	7	8	4.86283	3.45	0.141935	1.75	3.12833	0	713	89.125	88.5	0.000470728
R=2	unclass	unclass	unclass/unclass	R=2#unclass/unclass	147	717	46	713	11.9288	11.4	2.23648	0.9	3.09594	0.6	81189	113.234	122	0.0536016
R=200.chkTE	unclass	unclass	unclass/unclass	R=200.chkTE#unclass/unclass	135	1	0	1	5.3	5.3	2.6	2.6	0	0	38	38	38	2.51e-05
R=2000	unclass	unclass	unclass/unclass	R=2000#unclass/unclass	468	4	4	4	3.12834	2.9	0.151911	0	0.80828	0.3	1884	471	469.5	0.00124383
R=2001	unclass	unclass	unclass/unclass	R=2001#unclass/unclass	51	8	6	8	2.99534	2.95	0	0	1.05147	0	408	51	51	0.000269364
R=2004	unclass	unclass	unclass/unclass	R=2004#unclass/unclass	90	2	0	2	22.6478	18.6	0.855652	0	0	0.6	115	57.5	57.5	7.59e-05
R=2005	unclass	unclass	unclass/unclass	R=2005#unclass/unclass	172	5	3	5	4.13628	0	0.151327	0	0	0	678	135.6	171	0.00044762
R=2007	unclass	unclass	unclass/unclass	R=2007#unclass/unclass	71	5	5	5	2.52	1.4	0	0	0	0	355	71	71	0.000234374
R=2011.chkTE	unclass	unclass	unclass/unclass	R=2011.chkTE#unclass/unclass	91	24	9	24	5.08908	5.7	1.53807	0	0.739798	0	2078	86.5833	90	0.00137191
R=2017	unclass	unclass	unclass/unclass	R=2017#unclass/unclass	97	3	3	3	2.1	2.1	0.325424	1	1.79797	0	295	98.3333	97	0.000194761
R=2018	unclass	unclass	unclass/unclass	R=2018#unclass/unclass	62	8	7	8	2.28568	0.8	1.85996	0	0	0	482	60.25	62	0.00031822
R=2019	unclass	unclass	unclass/unclass	R=2019#unclass/unclass	60	6	5	6	0	0	0	0	0	0	358	59.6667	60	0.000236354
R=2020	unclass	unclass	unclass/unclass	R=2020#unclass/unclass	182	16	4	16	4.31206	3.6	0.784994	0	2.9614	0	1666	104.125	64.5	0.0010999
R=2021.chkTE	unclass	unclass	unclass/unclass	R=2021.chkTE#unclass/unclass	71	1	1	1	21.1	21.1	0	0	0	0	71	71	71	4.69e-05
R=2023	unclass	unclass	unclass/unclass	R=2023#unclass/unclass	108	5	5	5	1.49399	1.1	0	0	0	0	616	123.2	127	0.000406688
R=203.chkTE	DNA	TcMar	DNA/TcMar	R=203.chkTE#DNA/TcMar	382	62	1	61	16.6207	14.65	3.16336	1.8	2.8192	2	24375	393.145	256	0.0160925	3	1.98e-06
R=2030	unclass	unclass	unclass/unclass	R=2030#unclass/unclass	120	4	3	4	1.05105	1.25	0	0	0	0	478	119.5	120	0.000315579
R=2036.chkTE	unclass	unclass	unclass/unclass	R=2036.chkTE#unclass/unclass	136	6	3	6	2.91759	2.9	0	0	0.165345	0	580	96.6667	102.5	0.00038292
R=2042	unclass	unclass	unclass/unclass	R=2042#unclass/unclass	66	3	3	3	3	3	0	0	0	0	198	66	66	0.000130721
R=2049	unclass	unclass	unclass/unclass	R=2049#unclass/unclass	178	26	4	24	15.7717	20.8	0.961865	0.95	1.48253	0.3	3721	143.115	139.5	0.00245663
R=2054	unclass	unclass	unclass/unclass	R=2054#unclass/unclass	142	14	9	14	4.54893	4.2	1.09918	0	1.4385	0	1821	130.071	142	0.00120224
R=2055	unclass	unclass	unclass/unclass	R=2055#unclass/unclass	65	54	30	54	4.73195	4.6	0.576014	0	1.74759	0	3402	63	65	0.00224602
R=2057	unclass	unclass	unclass/unclass	R=2057#unclass/unclass	60	4	4	4	0	0	0	0	0	0	240	60	60	0.00015845
R=2059.chkTE	unclass	unclass	unclass/unclass	R=2059.chkTE#unclass/unclass	279	12	4	12	3.70626	2.9	0.113868	0.2	0.363546	0	1709	142.417	85.5	0.00112829
R=2062	unclass	unclass	unclass/unclass	R=2062#unclass/unclass	173	10	5	10	9.68099	6.85	1.18003	0	0.419008	0.3	1452	145.2	170	0.000958621
R=2065	unclass	unclass	unclass/unclass	R=2065#unclass/unclass	74	8	5	8	4.63393	2.85	0	0	0.364476	0	563	70.375	74	0.000371697
R=2066	unclass	unclass	unclass/unclass	R=2066#unclass/unclass	153	10	5	10	11.6765	8.85	1.50848	0.35	1.0987	1	1462	146.2	151.5	0.000965223
R=2071	unclass	unclass	unclass/unclass	R=2071#unclass/unclass	115	14	8	14	6.55013	6.1	4.28448	0	0.0653846	0	1508	107.714	114.5	0.000995592
R=2075	unclass	unclass	unclass/unclass	R=2075#unclass/unclass	233	46	7	43	20.0687	21.45	0.982806	0.5	2.39565	0.5	8497	184.717	216	0.00560978
R=2076	unclass	unclass	unclass/unclass	R=2076#unclass/unclass	193	7	6	7	4.63143	4.2	0.199586	0	0.202279	0	1931	275.857	276	0.00127486
R=2077	unclass	unclass	unclass/unclass	R=2077#unclass/unclass	173	5	4	5	3.67473	2.9	0.125386	0	0	0	843	168.6	173	0.000556555
R=2082	DNA	TcMar	DNA/TcMar	R=2082#DNA/TcMar	115	31	6	31	21.2216	22.9	2.86068	2.8	2.42708	2.8	3080	99.3548	110	0.00203344
R=2085	unclass	unclass	unclass/unclass	R=2085#unclass/unclass	414	8	4	8	11.7034	9.75	1.62829	1.45	1.57302	0.35	3284	410.5	414	0.00216812
R=2089	unclass	unclass	unclass/unclass	R=2089#unclass/unclass	172	10	6	10	5.52025	5.65	0.793977	0	1.02141	0	1378	137.8	170.5	0.000909765
R=2091	unclass	unclass	unclass/unclass	R=2091#unclass/unclass	72	15	12	15	7.01018	8	0.576625	0	0.0960233	0	1031	68.7333	72	0.000680673
R=2098	unclass	unclass	unclass/unclass	R=2098#unclass/unclass	119	87	9	87	15.1049	15.7	3.38428	0	1.65094	1.2	8377	96.2874	81	0.00553056
R=2099	unclass	unclass	unclass/unclass	R=2099#unclass/unclass	100	4	0	4	19.0244	19.3	1.77976	0.55	1.21845	1.8	336	84	85.5	0.00022183
R=2100	unclass	unclass	unclass/unclass	R=2100#unclass/unclass	213	6	5	6	5.20631	3.3	0.608165	0.25	1.55101	0.25	1188	198	213	0.000784326
R=2101	DNA	Maverick	DNA/Maverick	R=2101#DNA/Maverick	189	23	2	22	15.647	15.7	1.488	0	1.16442	0	3100	134.783	146	0.00204664
R=2104	unclass	unclass	unclass/unclass	R=2104#unclass/unclass	99	1	0	1	17.4	17.4	0	0	1.2	1.2	104	104	104	6.87e-05
R=2110	unclass	unclass	unclass/unclass	R=2110#unclass/unclass	135	5	5	5	4.69758	3.7	2.13707	0	0	0	661	132.2	135	0.000436397
R=2113.H	DNA	TcMar	DNA/TcMar	R=2113.H#DNA/TcMar	275	13	5	13	17.7286	8.1	2.31093	1.4	2.14946	1.1	2699	207.615	250	0.0017819
R=2114.chkTE	unclass	unclass	unclass/unclass	R=2114.chkTE#unclass/unclass	411	69	6	65	20.8282	22.6	2.28427	2.3	2.93759	1.5	24193	350.623	178	0.0159724
R=2115	unclass	unclass	unclass/unclass	R=2115#unclass/unclass	228	17	4	17	14.3201	19	2.01357	3.4	2.42146	2.5	2623	154.294	124	0.00173172
R=2116	unclass	unclass	unclass/unclass	R=2116#unclass/unclass	79	11	5	11	10.6808	13.9	0.476868	0	0	0	843	76.6364	78	0.000556555
R=2120.H	DNA	Merlin	DNA/Merlin	R=2120.H#DNA/Merlin	287	29	1	28	25.8054	30.1	2.59267	2.5	2.63815	1.8	6805	234.655	261	0.00449271
R=2125	unclass	unclass	unclass/unclass	R=2125#unclass/unclass	419	15	3	15	12.2305	8.4	1.98233	1.2	2.06124	0.2	4494	299.6	327	0.00296697
R=2126	DNA	TcMar	DNA/TcMar	R=2126#DNA/TcMar	91	8	8	8	2.33492	2.25	0.681037	0	1.46767	0	733	91.625	91	0.000483932
R=2127.chkTE	unclass	unclass	unclass/unclass	R=2127.chkTE#unclass/unclass	91	3	3	3	4.03333	3.3	0	0	0	0	273	91	91	0.000180237
R=2129	DNA	TcMar	DNA/TcMar	R=2129#DNA/TcMar	121	7	4	7	18.7649	18.1	3.99342	2.2	2.42494	2.5	2037	291	288	0.00134484
R=213.check-RbCrack-16_AAe	unclass	unclass	unclass/unclass	R=213.check-RbCrack-16_AAe#unclass/unclass	473	55	1	50	8.42708	6.5	2.05573	0	0.936521	1.1	12631	229.655	171	0.00833907
R=2130	unclass	unclass	unclass/unclass	R=2130#unclass/unclass	75	7	7	7	3.80169	4	0	0	1.22034	0	531	75.8571	75	0.00035057
R=2131	unclass	unclass	unclass/unclass	R=2131#unclass/unclass	74	6	1	6	8.8465	10.8	0.843137	0	1.43137	0	357	59.5	63	0.000235694
R=2137	unclass	unclass	unclass/unclass	R=2137#unclass/unclass	122	9	6	9	5.83976	4.9	0.291608	0	0.423576	0	1001	111.222	122	0.000660867
R=214	DNA	TcMar	DNA/TcMar	R=214#DNA/TcMar	107	24	18	24	7.72596	7.3	0.987783	0	0.548252	0	2431	101.292	107	0.00160496
R=2142	unclass	unclass	unclass/unclass	R=2142#unclass/unclass	82	16	11	16	8.63303	6.9	0.0798685	0	0.0815119	0	1217	76.0625	82	0.000803472
R=2143	unclass	unclass	unclass/unclass	R=2143#unclass/unclass	104	7	5	7	6.72465	2.9	0.710704	0	0.562676	0	710	101.429	104	0.000468747
R=2144	unclass	unclass	unclass/unclass	R=2144#unclass/unclass	132	11	7	11	7.37703	7.2	0.294772	0	0.383358	0	1358	123.455	132	0.000896561
R=2146	unclass	unclass	unclass/unclass	R=2146#unclass/unclass	64	5	5	5	7.16	6.2	0	0	0	0	320	64	64	0.000211266
R=2150	unclass	unclass	unclass/unclass	R=2150#unclass/unclass	100	5	5	5	9.6	9	0	0	0	0	500	100	100	0.000330104
R=2151.chkTE	unclass	unclass	unclass/unclass	R=2151.chkTE#unclass/unclass	94	7	3	7	8.74264	9.7	0.190503	0	0	0	537	76.7143	71	0.000354531
R=2152	unclass	unclass	unclass/unclass	R=2152#unclass/unclass	119	26	6	26	16.2644	17.1	2.40108	0.6	2.54638	1.4	2779	106.885	115	0.00183472
R=2155	unclass	unclass	unclass/unclass	R=2155#unclass/unclass	50	6	6	6	9.33333	9	0	0	0	0	300	50	50	0.000198062
R=2156.chkTE	unclass	unclass	unclass/unclass	R=2156.chkTE#unclass/unclass	74	1	1	1	4.7	4.7	0	0	0	0	116	116	116	7.66e-05
R=216	unclass	unclass	unclass/unclass	R=216#unclass/unclass	306	63	9	63	12.5106	12.3	2.48199	1.3	2.5413	1.4	14884	236.254	286	0.00982652
R=2160	unclass	unclass	unclass/unclass	R=2160#unclass/unclass	70	10	6	10	5.66667	6.45	1.34345	0	0.802976	0	672	67.2	70	0.000443659
R=2161	unclass	unclass	unclass/unclass	R=2161#unclass/unclass	302	15	8	14	17.737	15.8	0.254438	0	0.342006	0	3909	260.6	301	0.00258075
R=2163.H	DNA	TcMar	DNA/TcMar	R=2163.H#DNA/TcMar	251	7	6	7	14.9365	12.2	0.795572	0.7	1.0078	0.5	2552	364.571	382	0.00168485
R=2164	DNA	TcMar	DNA/TcMar	R=2164#DNA/TcMar	610	28	4	26	20.9006	26.5	3.62011	2.85	2.69966	3.9	10239	365.679	330	0.00675986	16	1.06e-05
R=2171	unclass	unclass	unclass/unclass	R=2171#unclass/unclass	124	6	3	6	3.13243	2.4	4.56743	0.4	0.281143	0	700	116.667	122.5	0.000462145
R=2172	unclass	unclass	unclass/unclass	R=2172#unclass/unclass	107	5	4	5	4.03454	4.7	0	0	0.185496	0	524	104.8	107	0.000345948
R=2173.check-RbtRNA-Tyr-TAC	unclass	unclass	unclass/unclass	R=2173.check-RbtRNA-Tyr-TAC#unclass/unclass	51	14	8	14	1.98939	1	0.138614	0	0	0	707	50.5	51	0.000466766
R=2177	unclass	unclass	unclass/unclass	R=2177#unclass/unclass	145	10	6	10	13.535	11.4	0.590588	0	0.937647	0	1190	119	145	0.000785646
R=2179	unclass	unclass	unclass/unclass	R=2179#unclass/unclass	79	7	6	7	4.22555	1.4	0	0	0	0	548	78.2857	79	0.000361793
R=218	unclass	unclass	unclass/unclass	R=218#unclass/unclass	249	139	1	132	13.7246	12.6	3.45327	0.9	2.05559	1.9	24319	174.957	197	0.0160556	2	1.32e-06
R=2181	unclass	unclass	unclass/unclass	R=2181#unclass/unclass	175	88	17	88	14.8199	15.6	4.19315	3.35	4.74734	3.9	13108	148.955	159	0.00865399
R=2182	unclass	unclass	unclass/unclass	R=2182#unclass/unclass	100	11	6	11	7.42997	5	1.70085	0	0.643544	0	1061	96.4545	99	0.00070048
R=2184	unclass	unclass	unclass/unclass	R=2184#unclass/unclass	76	5	3	5	5.14363	1.3	0	0	0	0	369	73.8	76	0.000243616
R=2188	unclass	unclass	unclass/unclass	R=2188#unclass/unclass	66	10	9	10	4.97236	4.55	0.308075	0	0	0	644	64.4	66	0.000425173
R=2189	unclass	unclass	unclass/unclass	R=2189#unclass/unclass	134	6	6	6	0	0	0	0	0	0	804	134	134	0.000530806
R=219.H	DNA	TcMar	DNA/TcMar	R=219.H#DNA/TcMar	1554	137	0	127	21.665	28	3.30031	3.1	3.04267	3.4	58935	430.182	309	0.0389093	25	1.65e-05
R=2195	unclass	unclass	unclass/unclass	R=2195#unclass/unclass	379	3	3	3	4.86315	4.3	0.798671	0.3	0.0996457	0.3	1129	376.333	376	0.000745374
R=22.chkTE	DNA	TcMar?	DNA/TcMar?	R=22.chkTE#DNA/TcMar?	627	1736	17	1697	11.4263	11.1	4.11706	2.3	3.22148	2.3	468904	270.106	186	0.309574	331	0.000218529
R=220	unclass	unclass	unclass/unclass	R=220#unclass/unclass	244	81	17	81	11.6747	11.5	2.24484	1.8	3.13519	1	15859	195.79	223	0.0104702
R=2200	unclass	unclass	unclass/unclass	R=2200#unclass/unclass	124	8	6	8	8.32275	4.45	0.404918	0	0.1	0.4	976	122	123.5	0.000644362
R=2202	unclass	unclass	unclass/unclass	R=2202#unclass/unclass	54	19	6	19	11.0487	11.5	0.625806	0	1.54703	0	961	50.5789	52	0.000634459
R=2206	unclass	unclass	unclass/unclass	R=2206#unclass/unclass	90	16	12	16	6.72796	5.05	2.06848	0	1.30372	0	1345	84.0625	89	0.000887978
R=221	unclass	unclass	unclass/unclass	R=221#unclass/unclass	108	75	0	70	8.07552	8.5	1.28111	1.4	2.50683	1.4	5638	75.1733	70	0.00372225	29	1.91e-05
R=2210	unclass	unclass	unclass/unclass	R=2210#unclass/unclass	88	17	8	17	4.73764	3.5	0.295146	0	0.594025	0	1339	78.7647	86	0.000884017	15	9.9e-06
R=2211	unclass	unclass	unclass/unclass	R=2211#unclass/unclass	85	5	3	5	4.43412	4.7	0.897647	0	0.607059	1.2	340	68	84	0.00022447
R=2213	unclass	unclass	unclass/unclass	R=2213#unclass/unclass	114	6	6	6	2.65	1.8	0	0	0	0	684	114	114	0.000451582
R=2214	unclass	unclass	unclass/unclass	R=2214#unclass/unclass	114	7	4	7	12.2475	11.4	0.529596	0	0.529596	0	767	109.571	114	0.000506379
R=2215	unclass	unclass	unclass/unclass	R=2215#unclass/unclass	73	12	4	11	10.7091	8.4	2.07367	0	0.174226	0	904	75.3333	72	0.000596827
R=2216	unclass	unclass	unclass/unclass	R=2216#unclass/unclass	104	12	2	12	17.7735	19.35	1.19398	2	2.65301	1	1162	96.8333	97.5	0.000767161
R=2217	DNA	TcMar	DNA/TcMar	R=2217#DNA/TcMar	122	6	4	6	4.08102	4.6	0.141022	0	1.21401	0	685	114.167	122	0.000452242
R=2220	unclass	unclass	unclass/unclass	R=2220#unclass/unclass	60	7	7	7	7.61429	5	0	0	0	0	420	60	60	0.000277287
R=2221	unclass	unclass	unclass/unclass	R=2221#unclass/unclass	70	40	24	40	16.2599	16.65	0.220244	0	0.0362694	0	2702	67.55	70	0.00178388
R=2222	unclass	unclass	unclass/unclass	R=2222#unclass/unclass	121	60	13	60	13.3121	15	2.18185	0	1.01499	0.8	5685	94.75	103.5	0.00375328
R=2223	DNA	TcMar	DNA/TcMar	R=2223#DNA/TcMar	300	11	6	11	5.6847	3.1	1.06039	0.3	0.674795	0.3	2444	222.182	296	0.00161355
R=2225	unclass	unclass	unclass/unclass	R=2225#unclass/unclass	115	12	6	12	10.7548	8.3	0.633386	0	0.968982	0	1267	105.583	115	0.000836482
R=2226	unclass	unclass	unclass/unclass	R=2226#unclass/unclass	87	5	4	5	3.04965	3.5	0	0	0.966744	0	433	86.6	87	0.00028587
R=223.chkTE	unclass	unclass	unclass/unclass	R=223.chkTE#unclass/unclass	325	61	0	61	16.466	16.6	5.36103	2	3.60948	3.1	9194	150.721	113	0.00606994
R=2231	unclass	unclass	unclass/unclass	R=2231#unclass/unclass	50	4	4	4	3.5	4	0	0	0	0	200	50	50	0.000132041
R=2234	unclass	unclass	unclass/unclass	R=2234#unclass/unclass	62	6	6	6	3.21667	3.2	0	0	0	0	372	62	62	0.000245597
R=2235	unclass	unclass	unclass/unclass	R=2235#unclass/unclass	172	7	3	7	13.1154	21.8	0.391329	0	0	0	1038	148.286	170	0.000685295
R=2239	unclass	unclass	unclass/unclass	R=2239#unclass/unclass	87	4	4	4	6.625	6.35	0	0	0	0	348	87	87	0.000229752
R=2241	unclass	unclass	unclass/unclass	R=2241#unclass/unclass	67	9	9	9	0.827842	0	0	0	0.701812	0	607	67.4444	67	0.000400746
R=2242	unclass	unclass	unclass/unclass	R=2242#unclass/unclass	58	34	15	34	9.52928	10.3	0	0	0.171367	0	1851	54.4412	56.5	0.00122204
R=2249	unclass	unclass	unclass/unclass	R=2249#unclass/unclass	83	7	7	7	2.57143	2.4	0	0	0	0	581	83	83	0.00038358
R=2250	unclass	unclass	unclass/unclass	R=2250#unclass/unclass	53	8	4	8	2.19489	0.95	0.243309	0	0	0	411	51.375	52.5	0.000271345
R=2252	unclass	unclass	unclass/unclass	R=2252#unclass/unclass	98	12	10	12	3.39525	2.05	0	0	2.29059	0	1179	98.25	98	0.000778384
R=2253.H	DNA	TcMar	DNA/TcMar	R=2253.H#DNA/TcMar	170	20	4	19	18.7016	23.65	1.67114	0	1.68305	0.3	2862	143.1	159.5	0.00188951
R=2254	DNA	TcMar	DNA/TcMar	R=2254#DNA/TcMar	401	11	5	11	8.07586	5.9	1.44726	0.2	0.882439	0.9	3542	322	399	0.00233845
R=2257	unclass	unclass	unclass/unclass	R=2257#unclass/unclass	68	15	1	15	10.4088	10.7	0.764642	1.8	2.75293	0	922	61.4667	61	0.000608711
R=2258	unclass	unclass	unclass/unclass	R=2258#unclass/unclass	83	5	5	5	4.32	2.4	0	0	0	0	415	83	83	0.000273986
R=2259	unclass	unclass	unclass/unclass	R=2259#unclass/unclass	50	6	6	6	2	1	0	0	0	0	300	50	50	0.000198062
R=2262	unclass	unclass	unclass/unclass	R=2262#unclass/unclass	69	63	39	63	10.2123	10.6	2.54572	0	1.01014	1.5	4134	65.619	67	0.0027293
R=2263.chkTE	DNA	TcMar	DNA/TcMar	R=2263.chkTE#DNA/TcMar	222	4	4	4	0.95	0.95	0	0	0	0	888	222	222	0.000586264
R=2264	unclass	unclass	unclass/unclass	R=2264#unclass/unclass	82	16	5	16	11.481	10.7	1.68599	0	0.266489	0	1128	70.5	75.5	0.000744714
R=2267	unclass	unclass	unclass/unclass	R=2267#unclass/unclass	164	5	3	5	7.18085	3	1.00426	0	0.901126	0	799	159.8	164	0.000527505
R=2270	unclass	unclass	unclass/unclass	R=2270#unclass/unclass	142	13	6	13	11.4696	5.6	2.53877	0	1.317	0	1571	120.846	133	0.00103718
R=2272	unclass	unclass	unclass/unclass	R=2272#unclass/unclass	158	12	5	12	4.65433	4.15	0.830907	0	0.778571	0	1456	121.333	156	0.000961261
R=2277	unclass	unclass	unclass/unclass	R=2277#unclass/unclass	206	2	2	2	2.65721	2.65	0	0.95	0.959135	0	416	208	208	0.000274646
R=2278	DNA	Tlr	DNA/Tlr	R=2278#DNA/Tlr	407	11	3	10	16.7672	17.2	1.44028	1.6	1.43065	1.5	5693	517.545	655	0.00375856
R=2282	DNA	TcMar	DNA/TcMar	R=2282#DNA/TcMar	143	23	3	23	19.2853	21.3	1.11889	0.9	1.39368	0.9	2895	125.87	130	0.0019113
R=2284	unclass	unclass	unclass/unclass	R=2284#unclass/unclass	84	15	9	15	6.55754	6	0.524412	0	0.0868352	0	1147	76.4667	83	0.000757257
R=2285	unclass	unclass	unclass/unclass	R=2285#unclass/unclass	54	23	8	23	4.69133	5	0.269828	0	1.00434	0	1107	48.1304	46	0.000730849
R=2287	unclass	unclass	unclass/unclass	R=2287#unclass/unclass	63	26	14	26	7.15456	6.5	0.0674603	0	0.0677249	0	1512	58.1538	63	0.000998233
R=229.chkTE	unclass	unclass	unclass/unclass	R=229.chkTE#unclass/unclass	207	30	12	30	9.08559	8.7	3.5768	1.2	1.56796	1	5137	171.233	196.5	0.00339148
R=2291	unclass	unclass	unclass/unclass	R=2291#unclass/unclass	103	11	8	11	9.63727	6.8	0.648708	0	0.657841	0	1084	98.5455	103	0.000715664
R=2292	unclass	unclass	unclass/unclass	R=2292#unclass/unclass	50	6	6	6	12.0132	12	0	0	0.688742	0	302	50.3333	50	0.000199383
R=2296	unclass	unclass	unclass/unclass	R=2296#unclass/unclass	79	29	18	29	7.46673	6.6	2.2058	0	1.22641	1.2	2086	71.931	78	0.00137719
R=23	unclass	unclass	unclass/unclass	R=23#unclass/unclass	618	677	4	644	14.8494	14.9	5.49098	3	4.56312	3.9	134153	198.158	173	0.0885688	70	4.62e-05
R=2300	unclass	unclass	unclass/unclass	R=2300#unclass/unclass	98	10	6	10	3.27765	2.6	0.426782	0	1.00648	0	926	92.6	98	0.000611352
R=2306	unclass	unclass	unclass/unclass	R=2306#unclass/unclass	108	5	4	5	3.9834	4.1	1.03693	0	0.203527	0	482	96.4	108	0.00031822
R=2310	unclass	unclass	unclass/unclass	R=2310#unclass/unclass	97	7	4	7	3.5467	3.2	0	0	0	0	621	88.7143	97	0.000409989
R=2311.chkTE	unclass	unclass	unclass/unclass	R=2311.chkTE#unclass/unclass	91	5	4	5	5.75792	5.3	0.473286	0	0.962175	0	423	84.6	91	0.000279268
R=2312	unclass	unclass	unclass/unclass	R=2312#unclass/unclass	107	8	8	8	3.15858	3.35	1.16195	0	1.95348	0	862	107.75	107	0.000569098
R=2313	unclass	unclass	unclass/unclass	R=2313#unclass/unclass	190	14	5	14	8.08719	1.85	3.32242	0	1.5481	0	1686	120.429	170	0.00111311
R=2314	unclass	unclass	unclass/unclass	R=2314#unclass/unclass	174	14	3	14	23.3498	23.7	1.471	1.05	2.88147	0.6	4345	310.357	192.5	0.0028686
R=2316	unclass	unclass	unclass/unclass	R=2316#unclass/unclass	86	5	2	5	17.4528	15	1.44175	3.6	3.29983	1.4	1145	229	179	0.000755937
R=2321	unclass	unclass	unclass/unclass	R=2321#unclass/unclass	139	9	3	9	11.2558	11.1	0.395575	0	0.809341	0	1017	113	113	0.000671431
R=2326.chkTE	unclass	unclass	unclass/unclass	R=2326.chkTE#unclass/unclass	215	11	2	11	14.2353	17.4	0.632133	0.8	1.07671	0	1889	171.727	189	0.00124713
R=2329.chkTE	DNA	TcMar	DNA/TcMar	R=2329.chkTE#DNA/TcMar	228	9	2	9	12.3779	9	2.03901	1.8	2.25208	0.5	2976	330.667	338	0.00196478
R=2331	unclass	unclass	unclass/unclass	R=2331#unclass/unclass	77	8	6	8	9.49003	8	0.169281	0	0.169281	0	612	76.5	77	0.000404047
R=2332	DNA	TcMar	DNA/TcMar	R=2332#DNA/TcMar	172	5	5	5	4.86	1.7	0	0	0	0	860	172	172	0.000567778
R=2333.H	DNA	TcMar	DNA/TcMar	R=2333.H#DNA/TcMar	518	18	8	17	19.3478	30	3.07991	2.15	2.39195	2.55	8090	449.444	493	0.00534107
R=2334.chkTE	unclass	unclass	unclass/unclass	R=2334.chkTE#unclass/unclass	345	12	4	12	12.2224	9.25	2.5027	1.1	1.38658	1.35	3331	277.583	323	0.00219915
R=2335	unclass	unclass	unclass/unclass	R=2335#unclass/unclass	64	3	0	3	12.7721	18	0	0	0	0	172	57.3333	61	0.000113556
R=2338	unclass	unclass	unclass/unclass	R=2338#unclass/unclass	200	6	4	6	7.14044	5.25	0	0	0	0	1135	189.167	200	0.000749335
R=2339	unclass	unclass	unclass/unclass	R=2339#unclass/unclass	53	6	3	6	6.00599	5.25	0	0	0	0	284	47.3333	49	0.000187499
R=2344	unclass	unclass	unclass/unclass	R=2344#unclass/unclass	273	26	14	26	11.338	12.05	2.49098	0.8	1.38827	1.1	5745	220.962	270.5	0.00379289
R=2345	DNA	TcMar	DNA/TcMar	R=2345#DNA/TcMar	81	9	4	9	0.187645	0	0	0	0	0	518	57.5556	80	0.000341987
R=235.chkTE	DNA	Maverick-Tlr	DNA/Maverick-Tlr	R=235.chkTE#DNA/Maverick-Tlr	1504	192	4	183	15.7893	18.6	2.0724	0.9	1.79195	1.4	77642	404.385	216.5	0.0512598	6	3.96e-06
R=2357	unclass	unclass	unclass/unclass	R=2357#unclass/unclass	80	4	2	4	4.78121	3.2	0	0	0	0	314	78.5	78.5	0.000207305
R=2360	unclass	unclass	unclass/unclass	R=2360#unclass/unclass	63	6	2	5	20.6826	19.45	3.53784	2.55	2.40188	2.7	1279	213.167	209	0.000844405
R=2362	unclass	unclass	unclass/unclass	R=2362#unclass/unclass	132	6	4	6	1.00126	0.4	0.693697	0	0	0	714	119	129.5	0.000471388
R=2367	unclass	unclass	unclass/unclass	R=2367#unclass/unclass	96	6	5	6	5.76087	3.1	1.81957	0	1.42011	0	552	92	96	0.000364434
R=2372	unclass	unclass	unclass/unclass	R=2372#unclass/unclass	128	8	6	8	7.06268	3.9	0.985201	0	0	0.4	919	114.875	127	0.00060673
R=2373	DNA	TcMar	DNA/TcMar	R=2373#DNA/TcMar	186	21	4	21	17.3898	23.5	1.60567	0	0.744363	1.2	2856	136	159	0.00188555
R=2375	unclass	unclass	unclass/unclass	R=2375#unclass/unclass	56	6	6	6	4.23323	1.9	1.50997	0	0	0	331	55.1667	56	0.000218529
R=2379	unclass	unclass	unclass/unclass	R=2379#unclass/unclass	68	7	6	7	5.27181	6.5	0.435683	0	0	0	454	64.8571	68	0.000299734
R=2380	unclass	unclass	unclass/unclass	R=2380#unclass/unclass	209	14	4	14	17.249	24.3	2.09093	2.55	2.68553	1.1	2294	163.857	160.5	0.00151451
R=2382.chkTE	unclass	unclass	unclass/unclass	R=2382.chkTE#unclass/unclass	152	11	4	11	6.55515	6.7	0.339491	0	0.82905	0	1494	135.818	150	0.000986349
R=2385	unclass	unclass	unclass/unclass	R=2385#unclass/unclass	140	10	5	10	5.44308	5.25	0.310653	0	1.17037	0.35	1286	128.6	138.5	0.000849026
R=2388	unclass	unclass	unclass/unclass	R=2388#unclass/unclass	117	14	10	14	15.1604	14.65	1.13284	0.8	2.69833	0	1495	106.786	117	0.00098701
R=2394	unclass	unclass	unclass/unclass	R=2394#unclass/unclass	61	4	1	4	11.0648	10.05	0.398438	10	7.73125	0	256	64	65	0.000169013
R=2397	unclass	unclass	unclass/unclass	R=2397#unclass/unclass	71	5	5	5	3.69693	1.4	0.285475	0	1.13799	0	358	71.6	71	0.000236354
R=2399.chkTE	unclass	unclass	unclass/unclass	R=2399.chkTE#unclass/unclass	91	5	4	5	5.74062	5.6	0	0	0	0	453	90.6	91	0.000299074
R=240	unclass	unclass	unclass/unclass	R=240#unclass/unclass	472	18	10	18	20.4748	20.85	0.990555	2.05	2.27915	0.7	7951	441.722	471.5	0.00524931
R=2401	unclass	unclass	unclass/unclass	R=2401#unclass/unclass	89	21	8	21	12.0555	12.8	3.06016	0	1.53312	1.3	1697	80.8095	85	0.00112037
R=2403	unclass	unclass	unclass/unclass	R=2403#unclass/unclass	156	4	3	4	5.00905	5.1	0.484375	0.65	1.00395	0	608	152	155.5	0.000401406
R=2411	unclass	unclass	unclass/unclass	R=2411#unclass/unclass	100	10	9	10	5.02974	4.55	0	0	0.41517	0	1002	100.2	100	0.000661527
R=2414	unclass	unclass	unclass/unclass	R=2414#unclass/unclass	144	8	0	7	15.1675	12.55	0.628951	1.1	1.39044	0.55	753	94.125	68	0.000497136
R=2417	unclass	unclass	unclass/unclass	R=2417#unclass/unclass	109	9	6	9	9.65562	7.3	0.22156	0	0.223624	0	872	96.8889	109	0.000575701
R=242.chkTE	unclass	unclass	unclass/unclass	R=242.chkTE#unclass/unclass	93	176	33	176	14.1577	13.95	0.936466	0	1.13599	0	13662	77.625	75	0.00901975
R=2421	unclass	unclass	unclass/unclass	R=2421#unclass/unclass	153	14	6	14	14.7741	16.25	1.4683	0.45	0.365119	1	1981	141.5	151.5	0.00130787
R=2423	unclass	unclass	unclass/unclass	R=2423#unclass/unclass	148	8	5	8	7.14207	4.75	0.378735	0	0.0949588	0.35	1091	136.375	147.5	0.000720286
R=2424	DNA	TcMar	DNA/TcMar	R=2424#DNA/TcMar	168	15	7	15	9.08487	9.2	1.28894	0	0.0986607	0.6	2016	134.4	155	0.00133098
R=2434	unclass	unclass	unclass/unclass	R=2434#unclass/unclass	77	5	3	5	14.1775	15.3	0.265775	0	0	0	374	74.8	77	0.000246917
R=2440.chkTE	unclass	unclass	unclass/unclass	R=2440.chkTE#unclass/unclass	214	12	2	11	6.29737	8.65	0.931459	0	0.37516	0.25	1405	117.083	91.5	0.000927591
R=2445	unclass	unclass	unclass/unclass	R=2445#unclass/unclass	112	7	6	7	6.85973	5.4	0	0	0	0	745	106.429	112	0.000491854
R=2446	unclass	unclass	unclass/unclass	R=2446#unclass/unclass	66	8	6	8	10.2544	9.1	0	0	0	0	526	65.75	66	0.000347269
R=2447	unclass	unclass	unclass/unclass	R=2447#unclass/unclass	78	42	11	42	11.9941	11.9	0.726535	0	1.56284	0	3030	72.1429	77	0.00200043
R=2449	unclass	unclass	unclass/unclass	R=2449#unclass/unclass	96	12	6	12	8.86619	9.35	2.44532	0	0.80835	0	982	81.8333	90.5	0.000648323
R=245	unclass	unclass	unclass/unclass	R=245#unclass/unclass	151	50	17	50	7.58677	5.45	3.87059	0.75	3.81178	0	6266	125.32	111.5	0.00413686
R=2452	unclass	unclass	unclass/unclass	R=2452#unclass/unclass	92	8	4	8	14.3416	13.9	0.139045	0	0.139045	0	712	89	91	0.000470067
R=2453	unclass	unclass	unclass/unclass	R=2453#unclass/unclass	138	14	5	14	6.79007	7.5	1.99392	0	1.34496	0	1299	92.7857	104.5	0.000857609
R=2456	unclass	unclass	unclass/unclass	R=2456#unclass/unclass	119	5	5	5	1.16	0.8	0	0	0	0	595	119	119	0.000392823
R=2458	unclass	unclass	unclass/unclass	R=2458#unclass/unclass	74	7	4	7	5.69495	2.9	0.215158	0	0.221053	0	475	67.8571	73	0.000313598
R=2460	unclass	unclass	unclass/unclass	R=2460#unclass/unclass	64	8	6	8	7.31135	6.4	0.388258	0	1.718	0	511	63.875	64	0.000337366
R=2465	unclass	unclass	unclass/unclass	R=2465#unclass/unclass	97	6	3	6	2.71574	2.6	0	0	0.175313	0	559	93.1667	96	0.000369056
R=2467	unclass	unclass	unclass/unclass	R=2467#unclass/unclass	232	6	6	6	4.06974	3.7	0.642075	0	0.353242	0.2	1388	231.333	232	0.000916367
R=2468	unclass	unclass	unclass/unclass	R=2468#unclass/unclass	146	11	4	11	13.6869	22.2	1.52159	1.2	1.3497	0	1181	107.364	91	0.000779705
R=2477	unclass	unclass	unclass/unclass	R=2477#unclass/unclass	52	8	5	8	5.1461	4.85	0.497561	0	0.253659	0	410	51.25	51.5	0.000270685
R=2479	unclass	unclass	unclass/unclass	R=2479#unclass/unclass	322	19	3	19	19.1369	23.3	3.85932	0.4	1.08061	3.3	4260	224.211	240	0.00281248
R=248.chkTE	unclass	unclass	unclass/unclass	R=248.chkTE#unclass/unclass	318	13	0	13	11.313	10.6	3.72282	0	0.90922	2.1	2397	184.385	188	0.00158252
R=2480	unclass	unclass	unclass/unclass	R=2480#unclass/unclass	119	5	5	5	1.83912	1.7	0.318381	0	0	0	593	118.6	119	0.000391503
R=2482.chkTE	DNA	TcMar	DNA/TcMar	R=2482.chkTE#DNA/TcMar	213	13	4	13	15.4633	23.8	0.978467	0	0.992113	0.6	2257	173.615	172	0.00149009
R=2484.chkTE	unclass	unclass	unclass/unclass	R=2484.chkTE#unclass/unclass	252	10	6	10	5.03213	4.35	1.4333	0	0.544468	0.2	1889	188.9	240.5	0.00124713
R=2486	unclass	unclass	unclass/unclass	R=2486#unclass/unclass	112	17	7	17	15.6388	22.9	0.216968	0	0.562021	0	1880	110.588	111	0.00124119
R=2489	unclass	unclass	unclass/unclass	R=2489#unclass/unclass	175	18	5	18	10.1025	14.15	2.66168	0	1.67354	3.7	2033	112.944	98.5	0.0013422
R=2492	unclass	unclass	unclass/unclass	R=2492#unclass/unclass	61	5	3	5	3.99172	3.3	0	0	0	0	302	60.4	61	0.000199383
R=2495	unclass	unclass	unclass/unclass	R=2495#unclass/unclass	154	5	3	5	8.83316	7.8	0.182143	0	0	0	588	117.6	153	0.000388202
R=2497	DNA	TcMar	DNA/TcMar	R=2497#DNA/TcMar	205	39	3	39	15.3773	12.8	3.35222	1.1	2.77217	2.1	6781	173.872	142	0.00447686	4	2.64e-06
R=25	unclass	unclass	unclass/unclass	R=25#unclass/unclass	539	548	21	486	9.40993	10.8	4.6989	0.6	1.64135	1.5	105390	192.318	149	0.0695792	2009	0.00132636
R=250.chkTE	unclass	unclass	unclass/unclass	R=250.chkTE#unclass/unclass	414	65	6	63	10.4489	13.8	2.54406	1	3.11313	1.2	10011	154.015	99	0.00660933	92	6.07e-05
R=2501	unclass	unclass	unclass/unclass	R=2501#unclass/unclass	90	36	21	36	16.802	18.1	2.82089	1.1	1.55886	2.2	3116	86.5556	89	0.0020572
R=2507	unclass	unclass	unclass/unclass	R=2507#unclass/unclass	67	7	5	7	3.39594	3	0.900451	0	0	0	443	63.2857	67	0.000292472
R=2509	unclass	unclass	unclass/unclass	R=2509#unclass/unclass	155	10	6	10	8.22815	7.7	0	0	0.289533	0	1414	141.4	155	0.000933533
R=251.chkTE	unclass	unclass	unclass/unclass	R=251.chkTE#unclass/unclass	338	41	0	40	20.3109	20	2.44353	0.9	2.76249	1.1	8038	196.049	218	0.00530674
R=2510	unclass	unclass	unclass/unclass	R=2510#unclass/unclass	138	7	4	7	6.98837	0.7	1.74163	0	1.25116	0	860	122.857	138	0.000567778
R=2519	unclass	unclass	unclass/unclass	R=2519#unclass/unclass	113	5	5	5	3.54629	4.4	0	0	0.181272	0	566	113.2	113	0.000373677
R=252.chkTE	unclass	unclass	unclass/unclass	R=252.chkTE#unclass/unclass	72	43	12	43	8.91032	8.4	0.926377	1.5	2.46722	0	3014	70.093	71	0.00198986
R=2520	unclass	unclass	unclass/unclass	R=2520#unclass/unclass	149	4	3	4	7.40592	7.05	1.9284	0.7	0.84669	0	574	143.5	148.5	0.000378959
R=2527	unclass	unclass	unclass/unclass	R=2527#unclass/unclass	100	5	3	5	2.06146	0	0	0	0.404665	0	493	98.6	100	0.000325482
R=2528	unclass	unclass	unclass/unclass	R=2528#unclass/unclass	57	5	5	5	4.57247	5.3	0	0	0.727526	0	287	57.4	57	0.000189479
R=2533	unclass	unclass	unclass/unclass	R=2533#unclass/unclass	110	3	3	3	2.99637	2.7	0	0	0.301813	0	331	110.333	110	0.000218529
R=2536	unclass	unclass	unclass/unclass	R=2536#unclass/unclass	131	3	2	3	7.59439	7.5	0.660066	0	0.348515	0	303	101	131	0.000200043
R=2537.chkTE	unclass	unclass	unclass/unclass	R=2537.chkTE#unclass/unclass	112	19	10	19	8.24434	8.9	0.410677	0	0.117095	0	1714	90.2105	111	0.00113159
R=254.chkTE	unclass	unclass	unclass/unclass	R=254.chkTE#unclass/unclass	260	58	14	58	7.0572	7.2	1.38696	0.4	0.901156	0.7	12106	208.724	245	0.00799247
R=2540	unclass	unclass	unclass/unclass	R=2540#unclass/unclass	111	8	6	8	10.3184	11.25	0.114849	0	0	0	862	107.75	111	0.000569098
R=2545	unclass	unclass	unclass/unclass	R=2545#unclass/unclass	73	4	3	4	7.95975	5.45	0.444654	0	0	0	318	79.5	79.5	0.000209946
R=2546	unclass	unclass	unclass/unclass	R=2546#unclass/unclass	62	4	4	4	3.225	0.8	0	0	0	0	248	62	62	0.000163731
R=2547	unclass	unclass	unclass/unclass	R=2547#unclass/unclass	107	3	1	3	1.62532	1.9	0.5	0.3	1.0124	0.9	387	129	130	0.0002555
R=2548	DNA	Merlin	DNA/Merlin	R=2548#DNA/Merlin	226	17	1	16	21.3449	28.5	1.14241	1.7	1.60746	1.1	3202	188.353	155	0.00211398
R=2549	unclass	unclass	unclass/unclass	R=2549#unclass/unclass	210	80	13	80	17.0552	18.75	4.14794	0.5	2.27519	1.45	13430	167.875	182.5	0.00886658
R=2550.chkTE	unclass	unclass	unclass/unclass	R=2550.chkTE#unclass/unclass	231	10	6	10	6.39287	6.55	1.11411	0	0	0.4	2048	204.8	227.5	0.0013521
R=2552	unclass	unclass	unclass/unclass	R=2552#unclass/unclass	167	11	5	11	13.0701	6.8	2.40107	0.6	1.31922	0	1592	144.727	159	0.00105105
R=2554	unclass	unclass	unclass/unclass	R=2554#unclass/unclass	154	38	4	38	12.0592	12.3	1.57583	4.6	4.35839	0.7	4953	130.342	142	0.00327001
R=2556	unclass	unclass	unclass/unclass	R=2556#unclass/unclass	68	44	8	43	13.2199	12.15	0.682718	0	1.03903	0	2818	64.0455	62	0.00186046
R=2557	unclass	unclass	unclass/unclass	R=2557#unclass/unclass	67	10	5	10	2.3445	2.4	0	0	0.71	0	600	60	65.5	0.000396124
R=2558	unclass	unclass	unclass/unclass	R=2558#unclass/unclass	68	12	10	12	8.71996	5.9	0.286031	0	0.435033	0	902	75.1667	68	0.000595507
R=2559	unclass	unclass	unclass/unclass	R=2559#unclass/unclass	93	17	5	17	11.8071	15.7	0.0706219	0	0.0706219	0	1399	82.2941	89	0.00092363
R=256.chkTE	unclass	unclass	unclass/unclass	R=256.chkTE#unclass/unclass	396	121	11	110	14.7964	14.2	4.91485	2.9	3.30421	4.1	26277	217.165	211	0.0173483	260	0.000171654
R=2560.chkTE	unclass	unclass	unclass/unclass	R=2560.chkTE#unclass/unclass	185	10	8	10	6.97305	6.35	0.41628	0.25	1.74579	0.25	1640	164	185	0.00108274
R=2561	unclass	unclass	unclass/unclass	R=2561#unclass/unclass	80	7	7	7	9.1	5	0	0	0	0	560	80	80	0.000369716
R=2562	unclass	unclass	unclass/unclass	R=2562#unclass/unclass	191	4	4	4	5.35	4.95	0	0	0	0	764	191	191	0.000504398
R=2563.chkTE	unclass	unclass	unclass/unclass	R=2563.chkTE#unclass/unclass	366	7	6	7	6.06664	8.9	0.791146	1.1	1.0002	1.1	2530	361.429	366	0.00167032
R=2565	unclass	unclass	unclass/unclass	R=2565#unclass/unclass	189	4	4	4	2.64577	2.9	0.27209	0	0.27791	0	756	189	189	0.000499117
R=2566	unclass	unclass	unclass/unclass	R=2566#unclass/unclass	50	43	15	43	6.95013	7.1	0.718804	0	0.263413	0	1957	45.5116	48	0.00129203
R=2569	unclass	unclass	unclass/unclass	R=2569#unclass/unclass	136	4	4	4	3.91978	3.3	0	0	1.34955	0	551	137.75	136	0.000363774
R=257	unclass	unclass	unclass/unclass	R=257#unclass/unclass	365	96	1	92	11.6597	13.9	2.80157	0.45	0.957824	1.25	19324	201.292	204	0.0127578	2	1.32e-06
R=2573	unclass	unclass	unclass/unclass	R=2573#unclass/unclass	84	15	5	15	4.92481	4.8	0.948574	0	0.980467	0	1157	77.1333	83	0.00076386
R=2574	unclass	unclass	unclass/unclass	R=2574#unclass/unclass	66	8	6	8	8.72627	9.85	0.191176	0	0.841569	0	510	63.75	66	0.000336706
R=2576	unclass	unclass	unclass/unclass	R=2576#unclass/unclass	105	6	4	6	0.172468	0	0	0	1.19003	0	632	105.333	105	0.000417251
R=258	unclass	unclass	unclass/unclass	R=258#unclass/unclass	586	28	0	24	17.351	19.8	0.965481	1.15	2.26797	0.45	7955	284.107	204.5	0.00525195
R=2581	unclass	unclass	unclass/unclass	R=2581#unclass/unclass	81	9	5	9	6.74003	7.1	1.5529	1.2	1.15714	0	707	78.5556	80	0.000466766
R=2583	unclass	unclass	unclass/unclass	R=2583#unclass/unclass	244	8	3	8	10.8524	10.25	1.35669	1.4	1.69176	0.65	1323	165.375	157	0.000873454
R=2585	unclass	unclass	unclass/unclass	R=2585#unclass/unclass	112	7	3	7	6.34744	6.2	0.693776	0	0.142462	0	723	103.286	108	0.00047733
R=2587	unclass	unclass	unclass/unclass	R=2587#unclass/unclass	62	13	6	13	8.61127	4.8	0.130769	0	0.668966	0	754	58	61	0.000497796
R=2588	unclass	unclass	unclass/unclass	R=2588#unclass/unclass	91	5	5	5	5.72	1.1	0.217582	0	0.222418	0	455	91	91	0.000300394
R=2589	unclass	unclass	unclass/unclass	R=2589#unclass/unclass	76	18	5	18	18.2415	19.65	0.151884	0	0.912323	0	1274	70.7778	74.5	0.000841104
R=259	unclass	unclass	unclass/unclass	R=259#unclass/unclass	682	67	3	65	7.97912	7.8	2.22904	1.8	2.41165	1.5	34251	511.209	639	0.0226128
R=2592	unclass	unclass	unclass/unclass	R=2592#unclass/unclass	101	9	9	9	7.99166	8	0.662788	0	0.945225	0	911	101.222	101	0.000601449
R=2593	unclass	unclass	unclass/unclass	R=2593#unclass/unclass	101	11	7	11	5.93992	7	1.08338	0	0.303835	0	1017	92.4545	100	0.000671431
R=2598	unclass	unclass	unclass/unclass	R=2598#unclass/unclass	191	6	2	6	5.66655	5.2	1.08184	0.7	0.724612	0	837	139.5	151	0.000552593
R=260.chkTE	unclass	unclass	unclass/unclass	R=260.chkTE#unclass/unclass	418	134	25	131	11.2535	10.6	4.02548	1.7	2.08162	2.75	41472	309.493	317	0.0273801
R=2601	unclass	unclass	unclass/unclass	R=2601#unclass/unclass	127	13	4	13	6.58711	7.3	0.398399	0	0.491753	0	1249	96.0769	87	0.000824599
R=2605	unclass	unclass	unclass/unclass	R=2605#unclass/unclass	74	66	8	66	13.4264	15.35	1.68202	1.5	3.05639	1.5	5139	77.8636	70	0.0033928
R=2607	unclass	unclass	unclass/unclass	R=2607#unclass/unclass	123	54	6	53	11.4297	12.45	2.22159	1	3.28668	1.45	5887	109.019	107.5	0.00388664
R=2608	unclass	unclass	unclass/unclass	R=2608#unclass/unclass	170	19	11	19	6.41442	6.5	0.567083	0	1.00145	0	2482	130.632	170	0.00163863
R=261.chkTE	DNA	Maverick	DNA/Maverick	R=261.chkTE#DNA/Maverick	266	59	9	57	15.6759	16	2.20399	2.7	3.08591	0.8	13356	226.373	253	0.00881773
R=2610	unclass	unclass	unclass/unclass	R=2610#unclass/unclass	85	7	5	7	3.31489	3.5	0.185294	0	0	0	544	77.7143	85	0.000359153
R=2611	unclass	unclass	unclass/unclass	R=2611#unclass/unclass	56	6	4	6	4.54727	1.9	0	0	0	0	330	55	56	0.000217868
R=2612.chkTE	unclass	unclass	unclass/unclass	R=2612.chkTE#unclass/unclass	156	8	3	8	8.17862	7	1.23988	0	0.172042	1.05	1141	142.625	149	0.000753296
R=2613	unclass	unclass	unclass/unclass	R=2613#unclass/unclass	465	9	3	9	13.8814	18.3	3.14534	1.5	1.0684	3.1	3174	352.667	457	0.0020955
R=2614.chkTE	unclass	unclass	unclass/unclass	R=2614.chkTE#unclass/unclass	449	8	6	8	14.4614	9.8	0.331459	0	0.331459	0	3325	415.625	449	0.00219519
R=2616	unclass	unclass	unclass/unclass	R=2616#unclass/unclass	70	3	2	3	25.1191	25.7	0	0	0	0	199	66.3333	70	0.000131381
R=2623	DNA	TcMar	DNA/TcMar	R=2623#DNA/TcMar	83	9	4	9	24.5364	22.8	2.82833	1.5	2.44498	1.8	2192	243.556	305	0.00144717
R=2624	DNA	TcMar	DNA/TcMar	R=2624#DNA/TcMar	731	43	5	41	16.7525	19.5	2.36328	1.9	2.97741	1.9	10875	252.907	113	0.00717975
R=2627	unclass	unclass	unclass/unclass	R=2627#unclass/unclass	53	4	4	4	6.6	6.6	0	0	0	0	212	53	53	0.000139964
R=2629	unclass	unclass	unclass/unclass	R=2629#unclass/unclass	122	6	6	6	7.38874	6.3	0.494537	0	1.08763	0.5	897	149.5	149.5	0.000592206
R=2631	unclass	unclass	unclass/unclass	R=2631#unclass/unclass	53	5	4	5	3.41667	3.8	0	0	0	0	264	52.8	53	0.000174295
R=2635	unclass	unclass	unclass/unclass	R=2635#unclass/unclass	93	5	4	5	3.05456	2.2	0	0	1.77113	0	471	94.2	93	0.000310958
R=2636	unclass	unclass	unclass/unclass	R=2636#unclass/unclass	112	11	7	11	10.5523	7.1	0	0	1.34836	0	1216	110.545	112	0.000802812
R=2637	unclass	unclass	unclass/unclass	R=2637#unclass/unclass	63	26	14	26	6.08926	5.7	2.28542	0	0.522656	0	1536	59.0769	61	0.00101408
R=2639	DNA	TcMar	DNA/TcMar	R=2639#DNA/TcMar	106	3	0	3	19.5527	22.2	0.726718	0	0.726718	0	262	87.3333	63	0.000172974
R=264	unclass	unclass	unclass/unclass	R=264#unclass/unclass	163	15	1	14	14.0716	11.9	3.93315	1.2	3.56733	1.2	1457	97.1333	89	0.000961922
R=2640	unclass	unclass	unclass/unclass	R=2640#unclass/unclass	103	32	10	32	10.1663	12.35	0.471472	0	0.168957	0	2983	93.2188	97.5	0.0019694
R=2641	unclass	unclass	unclass/unclass	R=2641#unclass/unclass	135	9	5	9	13.8884	15.6	0.185441	0	0	0	1044	116	135	0.000689256
R=2642	unclass	unclass	unclass/unclass	R=2642#unclass/unclass	170	6	6	6	5.20489	5.3	0.496774	0	0.810557	0.6	1023	170.5	170	0.000675392
R=2643	unclass	unclass	unclass/unclass	R=2643#unclass/unclass	141	3	2	3	6.85986	7.1	0	0	0.953052	0	426	142	141	0.000281248
R=2645.H	DNA	Merlin	DNA/Merlin	R=2645.H#DNA/Merlin	228	9	1	9	12.3138	11.5	0.573942	0.8	0.832614	0.3	2410	267.778	336	0.0015911
R=2647	unclass	unclass	unclass/unclass	R=2647#unclass/unclass	56	17	15	17	4.67561	3.6	0.949841	0	0.444221	1.7	943	55.4706	56	0.000622575
R=2648	unclass	unclass	unclass/unclass	R=2648#unclass/unclass	318	6	4	6	10.6728	7.7	1.21388	0	0.990678	0	1888	314.667	318	0.00124647
R=265	unclass	unclass	unclass/unclass	R=265#unclass/unclass	444	74	8	69	12.1034	13.2	2.71931	2.5	4.04501	2.05	17896	241.838	149.5	0.0118151	15	9.9e-06
R=2650	unclass	unclass	unclass/unclass	R=2650#unclass/unclass	270	7	4	7	5.57653	3.3	0.637283	0	0.793295	0	1730	247.143	270	0.00114216
R=2651	unclass	unclass	unclass/unclass	R=2651#unclass/unclass	95	10	5	10	4.3877	4.5	0.935632	0	0	0	870	87	94	0.00057438
R=2653	unclass	unclass	unclass/unclass	R=2653#unclass/unclass	116	4	3	4	6.44379	2.6	0.450339	0	0.450339	0	443	110.75	116	0.000292472
R=2655	unclass	unclass	unclass/unclass	R=2655#unclass/unclass	293	4	3	4	7.52642	8.1	0.73066	0	0.868585	1.25	1060	265	292.5	0.000699819
R=2662	unclass	unclass	unclass/unclass	R=2662#unclass/unclass	200	5	4	5	2.60419	2.5	0.39681	0	0.903789	0.5	1003	200.6	200	0.000662188
R=2666	unclass	unclass	unclass/unclass	R=2666#unclass/unclass	117	7	4	7	5.39451	5.1	0	0	0.6917	0	747	106.714	117	0.000493175
R=2672	unclass	unclass	unclass/unclass	R=2672#unclass/unclass	71	6	6	6	4.68333	4.2	0	0	0	0	426	71	71	0.000281248
R=2677	unclass	unclass	unclass/unclass	R=2677#unclass/unclass	171	14	1	14	8.65204	8.25	0.624976	0.1	1.24612	0.1	2062	147.286	185.5	0.00136135
R=2678	unclass	unclass	unclass/unclass	R=2678#unclass/unclass	60	6	5	6	3.12748	3.35	0.568272	0	0	0	353	58.8333	59.5	0.000233053
R=2686	unclass	unclass	unclass/unclass	R=2686#unclass/unclass	186	12	5	12	7.57387	5.4	1.01131	0	0.569005	0.25	1768	147.333	175	0.00116725
R=2689	unclass	unclass	unclass/unclass	R=2689#unclass/unclass	103	9	8	9	2.23555	2.9	1.78341	0	0	0	844	93.7778	103	0.000557215
R=2691	unclass	unclass	unclass/unclass	R=2691#unclass/unclass	72	7	6	7	4.98254	1.4	0	0	0.202778	0	504	72	72	0.000332744
R=270	unclass	unclass	unclass/unclass	R=270#unclass/unclass	188	84	2	82	11.8806	10.65	2.74732	0.2	1.70856	1.05	9973	118.726	106	0.00658424	335	0.000221169
R=2705	unclass	unclass	unclass/unclass	R=2705#unclass/unclass	76	9	4	9	10.6578	6.6	0	0	1.74978	0	669	74.3333	76	0.000441679
R=2710	unclass	unclass	unclass/unclass	R=2710#unclass/unclass	151	3	2	3	0.900887	0.7	0	0	0	0	451	150.333	151	0.000297753
R=2714	unclass	unclass	unclass/unclass	R=2714#unclass/unclass	180	12	3	12	13.923	11.65	1.99588	0	0.29709	0.6	2062	171.833	178	0.00136135
R=2722	unclass	unclass	unclass/unclass	R=2722#unclass/unclass	141	5	2	5	7.57663	8.3	0.321405	0	0.506863	0	612	122.4	140	0.000404047
R=2725	unclass	unclass	unclass/unclass	R=2725#unclass/unclass	189	21	4	21	12.0985	14.5	3.88746	3.1	2.8931	2.9	3390	161.429	171	0.0022381
R=2727	unclass	unclass	unclass/unclass	R=2727#unclass/unclass	51	5	5	5	0.78	0	0	0	0	0	255	51	51	0.000168353
R=2731	unclass	unclass	unclass/unclass	R=2731#unclass/unclass	129	4	3	4	10.198	13.4	2.58887	0	1.90855	0.8	503	125.75	128	0.000332084
R=2738	unclass	unclass	unclass/unclass	R=2738#unclass/unclass	52	8	3	8	5.74264	7.85	0	0	0	0	401	50.125	50.5	0.000264743
R=2739	unclass	unclass	unclass/unclass	R=2739#unclass/unclass	58	7	7	7	3.99307	3.5	0.49901	0	0	0	404	57.7143	58	0.000266724
R=2740.chkTE	unclass	unclass	unclass/unclass	R=2740.chkTE#unclass/unclass	245	5	4	5	4.27408	4.1	0.718561	0.4	0.640065	0.8	1223	244.6	245	0.000807433
R=2743.H	DNA	TcMar	DNA/TcMar	R=2743.H#DNA/TcMar	116	9	4	9	9.33083	8.6	0.218374	0	1.22228	0	947	105.222	116	0.000625216
R=2747	unclass	unclass	unclass/unclass	R=2747#unclass/unclass	145	4	4	4	4.175	2.8	0.175	0	0.175	0	580	145	145	0.00038292
R=2748.chkTE	unclass	unclass	unclass/unclass	R=2748.chkTE#unclass/unclass	106	2	1	2	1.89048	1.9	0	0	0	0	210	105	105	0.000138643
R=2751	unclass	unclass	unclass/unclass	R=2751#unclass/unclass	55	5	5	5	0	0	0	0	0	0	275	55	55	0.000181557
R=2754	unclass	unclass	unclass/unclass	R=2754#unclass/unclass	73	10	5	10	8.78308	6.8	0	0	0	0	650	65	67.5	0.000429135
R=2756	unclass	unclass	unclass/unclass	R=2756#unclass/unclass	135	11	7	11	10.6524	11.4	0.42589	0	0.488356	0	1460	132.727	134	0.000963902
R=2757	unclass	unclass	unclass/unclass	R=2757#unclass/unclass	176	8	5	8	8.13599	2.8	0.307261	0	0.157459	0	1267	158.375	176	0.000836482
R=276	DNA	DNA	DNA/DNA	R=276#DNA/DNA	94	62	5	62	7.78561	5.65	0.400276	0	0.502281	0	3990	64.3548	63.5	0.00263423
R=2760	unclass	unclass	unclass/unclass	R=2760#unclass/unclass	63	6	4	6	5.11801	4.85	0	0	0	0	372	62	63	0.000245597
R=2761	DNA	Merlin	DNA/Merlin	R=2761#DNA/Merlin	218	10	6	10	11.966	7.2	1.31856	0	0.54023	0	1827	182.7	218	0.0012062
R=2766	unclass	unclass	unclass/unclass	R=2766#unclass/unclass	59	7	6	7	8.6335	7.4	1.52487	0	0	0	394	56.2857	59	0.000260122
R=2767	unclass	unclass	unclass/unclass	R=2767#unclass/unclass	115	4	4	4	0.425926	0	0.223529	0	0	0	459	114.75	115	0.000303035
R=2777	unclass	unclass	unclass/unclass	R=2777#unclass/unclass	162	4	2	4	1.72431	1.6	0.376471	0	0	0	510	127.5	153	0.000336706
R=2778	unclass	unclass	unclass/unclass	R=2778#unclass/unclass	173	5	4	5	5.30385	4.7	0.830455	0	0.475029	0	857	171.4	172	0.000565797
R=2780.chkTE	DNA	TcMar	DNA/TcMar	R=2780.chkTE#DNA/TcMar	154	10	7	10	4.12376	2.4	2.83842	1	1.38139	0.35	1515	151.5	154	0.00100021
R=2781	unclass	unclass	unclass/unclass	R=2781#unclass/unclass	61	4	4	4	4.1	4.1	0	0	0	0	244	61	61	0.000161091
R=2782	unclass	unclass	unclass/unclass	R=2782#unclass/unclass	347	10	4	9	6.8504	5.6	0.568885	0	0.824258	0.15	2494	249.4	249	0.00164656
R=2786	unclass	unclass	unclass/unclass	R=2786#unclass/unclass	151	4	3	4	4.13657	4.15	0.809061	0	0.131068	0.6	618	154.5	154	0.000408008
R=2787	unclass	unclass	unclass/unclass	R=2787#unclass/unclass	70	6	6	6	6.50867	3.65	1.20289	0	0	0	415	69.1667	70	0.000273986
R=2788	unclass	unclass	unclass/unclass	R=2788#unclass/unclass	52	4	4	4	5.8	5.8	0	0	0	0	208	52	52	0.000137323
R=2789	DNA	Merlin	DNA/Merlin	R=2789#DNA/Merlin	92	5	4	5	1.99029	1.1	0.874172	0	0	0	453	90.6	92	0.000299074
R=2793	unclass	unclass	unclass/unclass	R=2793#unclass/unclass	72	7	2	7	14.9432	19.7	0	0	0	0	482	68.8571	68	0.00031822
R=2794	unclass	unclass	unclass/unclass	R=2794#unclass/unclass	64	4	4	4	5.05	5.45	0	0	0	0	256	64	64	0.000169013
R=2798	unclass	unclass	unclass/unclass	R=2798#unclass/unclass	82	4	3	4	2.46729	2.4	0	0	0	0	321	80.25	82	0.000211926
R=2799	unclass	unclass	unclass/unclass	R=2799#unclass/unclass	67	5	5	5	5.97768	1.5	0	0	0.303571	0	336	67.2	67	0.00022183
R=2800	unclass	unclass	unclass/unclass	R=2800#unclass/unclass	53	2	2	2	0	0	0	0	0	0	106	53	53	7e-05
R=2803	unclass	unclass	unclass/unclass	R=2803#unclass/unclass	72	6	5	6	4.32252	1.4	0.483777	1.35	2.56102	0	413	68.8333	72	0.000272666
R=2804.chkTE	unclass	unclass	unclass/unclass	R=2804.chkTE#unclass/unclass	67	6	5	6	9.50525	8.95	0	0	0	0	400	66.6667	67	0.000264083
R=2805	unclass	unclass	unclass/unclass	R=2805#unclass/unclass	68	10	5	10	8.64792	8.85	0.14911	0	0.61632	0	674	67.4	67	0.00044498
R=2815	unclass	unclass	unclass/unclass	R=2815#unclass/unclass	191	6	3	6	8.88005	8	0.442039	0	0.17585	0.25	1118	186.333	189.5	0.000738111
R=2816	unclass	unclass	unclass/unclass	R=2816#unclass/unclass	182	15	3	15	10.9152	10.3	0.275296	0	0.400451	0	1773	118.2	118	0.00117055
R=282.chkTE	unclass	unclass	unclass/unclass	R=282.chkTE#unclass/unclass	340	92	3	92	11.8134	11	2.38918	1.15	1.85138	0.9	22324	242.652	216	0.0147385	29	1.91e-05
R=2820	unclass	unclass	unclass/unclass	R=2820#unclass/unclass	64	10	7	10	8.19438	7.8	0	0	0.167576	0	623	62.3	64	0.000411309
R=2821.chkTE	unclass	unclass	unclass/unclass	R=2821.chkTE#unclass/unclass	218	7	5	7	5.54289	4.7	2.35471	0	0.732866	1.9	1497	213.857	215	0.00098833
R=2822.chkTE	unclass	unclass	unclass/unclass	R=2822.chkTE#unclass/unclass	131	4	4	4	2.07281	2.25	0	0	0.379278	0	526	131.5	131	0.000347269
R=2824	unclass	unclass	unclass/unclass	R=2824#unclass/unclass	130	4	4	4	4.64537	4.65	0.597683	0	0.199228	0.4	518	129.5	129.5	0.000341987
R=2825	DNA	TcMar	DNA/TcMar	R=2825#DNA/TcMar	253	9	2	9	8.36949	12.1	1.67122	0.7	1.69257	2.6	1845	205	201	0.00121808
R=283	unclass	unclass	unclass/unclass	R=283#unclass/unclass	282	24	0	23	7.00409	5.35	0.980182	0	2.59414	0	3739	155.792	183	0.00246851	353	0.000233053
R=2830	unclass	unclass	unclass/unclass	R=2830#unclass/unclass	422	3	3	3	8.93333	7.8	0	0	0	0	1266	422	422	0.000835822
R=2833.fam9.noTIR.P	DNA	TcMar	DNA/TcMar	R=2833.fam9.noTIR.P#DNA/TcMar	1205	26	0	26	17.7455	28.25	3.78448	2.2	2.52427	3.3	15308	588.769	594	0.0101064
R=2835	unclass	unclass	unclass/unclass	R=2835#unclass/unclass	210	8	5	8	14.7485	8.85	0.649765	0	2.2765	0.25	1702	212.75	210	0.00112367
R=2837.chkTE	unclass	unclass	unclass/unclass	R=2837.chkTE#unclass/unclass	133	4	2	4	5.59844	3.4	1.99911	2.2	0.930958	0	449	112.25	114	0.000296433
R=2839	unclass	unclass	unclass/unclass	R=2839#unclass/unclass	91	6	3	6	7.5167	6.65	0	0	0.591271	0	527	87.8333	90.5	0.000347929
R=2844	unclass	unclass	unclass/unclass	R=2844#unclass/unclass	91	4	4	4	4.95	2.2	0	0	0	0	364	91	91	0.000240315
R=2845	unclass	unclass	unclass/unclass	R=2845#unclass/unclass	81	5	5	5	4.48035	6.2	0.7301	0	0	0	402	80.4	81	0.000265403
R=2846	unclass	unclass	unclass/unclass	R=2846#unclass/unclass	113	6	6	6	3.96996	3.5	0	0	0.151105	0	679	113.167	113	0.000448281
R=2849	unclass	unclass	unclass/unclass	R=2849#unclass/unclass	140	4	4	4	2.51005	2.15	0.521544	0	0	0	557	139.25	139.5	0.000367735
R=2850.chkTE	unclass	unclass	unclass/unclass	R=2850.chkTE#unclass/unclass	102	1	0	1	10.5	10.5	0	0	1.1	1.1	96	96	96	6.34e-05
R=2853	unclass	unclass	unclass/unclass	R=2853#unclass/unclass	67	5	3	5	7.69079	1.5	0	0	0.329206	0	315	63	67	0.000207965
R=2854	unclass	unclass	unclass/unclass	R=2854#unclass/unclass	77	8	3	8	15.484	20.4	0	0	0	0	568	71	69	0.000374998
R=2856	unclass	unclass	unclass/unclass	R=2856#unclass/unclass	85	1	0	1	17.5	17.5	1.2	1.2	2.5	2.5	82	82	82	5.41e-05
R=2857	unclass	unclass	unclass/unclass	R=2857#unclass/unclass	216	17	5	17	19.3114	21.8	2.62573	0	1.1415	0.9	3082	181.294	194	0.00203476
R=286	unclass	unclass	unclass/unclass	R=286#unclass/unclass	102	46	12	46	9.11884	6	1.68354	0	1.11646	1	3865	84.0217	82	0.0025517
R=2868	unclass	unclass	unclass/unclass	R=2868#unclass/unclass	163	10	5	10	14.3624	14.4	1.00559	0	1.0167	0.3	1413	141.3	162.5	0.000932873
R=2871	unclass	unclass	unclass/unclass	R=2871#unclass/unclass	60	4	4	4	4.575	4.15	0	0	0	0	240	60	60	0.00015845
R=2874	DNA	Merlin	DNA/Merlin	R=2874#DNA/Merlin	300	29	4	29	22.9515	28.9	3.07443	2	2.16002	2.7	5440	187.586	180	0.00359153
R=2875	DNA	TcMar	DNA/TcMar	R=2875#DNA/TcMar	132	5	5	5	2.74773	1.5	0.161934	0	0.465559	0	662	132.4	132	0.000437057
R=2879	unclass	unclass	unclass/unclass	R=2879#unclass/unclass	69	4	4	4	3.28145	2.9	0.370909	0	0	0	275	68.75	69	0.000181557
R=2881	unclass	unclass	unclass/unclass	R=2881#unclass/unclass	56	5	3	5	4.15774	3.7	0	0	0	0	265	53	56	0.000174955
R=2887	unclass	unclass	unclass/unclass	R=2887#unclass/unclass	293	15	4	15	10.1669	12.8	1.47553	0.3	1.94832	0.3	2477	165.133	142	0.00163533
R=2889	unclass	unclass	unclass/unclass	R=2889#unclass/unclass	156	5	3	5	4.85199	2.6	2.01167	0	0.497613	0	754	150.8	155	0.000497796
R=2890	unclass	unclass	unclass/unclass	R=2890#unclass/unclass	153	8	6	8	5.04711	5.5	0.45689	0	0.284171	0	1074	134.25	152	0.000709062
R=2895	unclass	unclass	unclass/unclass	R=2895#unclass/unclass	50	5	4	5	3.76109	2.5	0.410042	0	0	0	239	47.8	50	0.000157789
R=2898	unclass	unclass	unclass/unclass	R=2898#unclass/unclass	121	2	0	2	24.2155	24.2	0	2.75	2.71459	0	233	116.5	116.5	0.000153828
R=29.C	LINE	L1-outcast	LINE/L1-outcast	R=29.C#LINE/L1-outcast	3347	764	5	550	9.9582	11.6	2.21455	0.4	0.845014	0.8	447459	585.679	339	0.295416	620	0.000409328
R=290	unclass	unclass	unclass/unclass	R=290#unclass/unclass	243	36	11	36	9.33318	8.05	1.28609	0	0.999533	0	5786	160.722	145.5	0.00381996
R=2900	unclass	unclass	unclass/unclass	R=2900#unclass/unclass	51	10	8	10	1.18095	0	0	0	0	0	504	50.4	51	0.000332744
R=2903.H	DNA	TcMar	DNA/TcMar	R=2903.H#DNA/TcMar	309	11	6	11	11.1294	7	2.611	0	0.689833	0	2754	250.364	306	0.00181821
R=2905	unclass	unclass	unclass/unclass	R=2905#unclass/unclass	52	1	1	1	0	0	0	0	0	0	52	52	52	3.43e-05
R=2907	unclass	unclass	unclass/unclass	R=2907#unclass/unclass	154	6	4	6	7.48355	7.9	1.92113	0	0.22461	0.45	833	138.833	152	0.000549952
R=2909	unclass	unclass	unclass/unclass	R=2909#unclass/unclass	83	36	19	36	7.27246	5.95	2.697	0	0.622077	2.15	2600	72.2222	79	0.00171654	34	2.24e-05
R=2913	unclass	unclass	unclass/unclass	R=2913#unclass/unclass	55	2	2	2	0	0	0	0	0	0	110	55	55	7.26e-05
R=2920	unclass	unclass	unclass/unclass	R=2920#unclass/unclass	61	15	13	15	9.36187	9.9	0.0287606	0	0	0	1057	70.4667	77	0.000697839
R=2922	unclass	unclass	unclass/unclass	R=2922#unclass/unclass	51	5	5	5	2.76732	2	0.393701	0	0	0	254	50.8	51	0.000167693
R=2925	DNA	TcMar	DNA/TcMar	R=2925#DNA/TcMar	106	8	0	4	26.7475	26.5	4.03808	5.4	5.77983	3.5	2122	265.25	151.5	0.00140096
R=2926	unclass	unclass	unclass/unclass	R=2926#unclass/unclass	162	1	1	1	5.6	5.6	0	0	0	0	162	162	162	0.000106954
R=2930	unclass	unclass	unclass/unclass	R=2930#unclass/unclass	88	1	0	1	26	26	1.8	1.8	0.8	0.8	285	285	285	0.000188159
R=2931	unclass	unclass	unclass/unclass	R=2931#unclass/unclass	63	5	5	5	1.58	0	0	0	0	0	315	63	63	0.000207965
R=2932	unclass	unclass	unclass/unclass	R=2932#unclass/unclass	68	3	3	3	0	0	0.490244	0	0.990244	1.5	205	68.3333	68	0.000135342
R=2937	unclass	unclass	unclass/unclass	R=2937#unclass/unclass	51	9	4	9	7.3788	8.5	0	0	0	0	434	48.2222	49	0.00028653
R=2938	unclass	unclass	unclass/unclass	R=2938#unclass/unclass	75	6	3	6	9.17546	9.55	0.234404	0	0	0	436	72.6667	74.5	0.00028785
R=294	unclass	unclass	unclass/unclass	R=294#unclass/unclass	378	76	17	74	13.1395	13.1	3.79956	0.8	1.19706	1.25	18495	243.355	245	0.0122105
R=2940	unclass	unclass	unclass/unclass	R=2940#unclass/unclass	134	6	4	6	1.76185	0.75	0	0	0.516209	0	802	133.667	134	0.000529486
R=2944	unclass	unclass	unclass/unclass	R=2944#unclass/unclass	51	9	9	9	6.7527	3.9	3.3723	0	0	0	444	49.3333	51	0.000293132
R=2945	unclass	unclass	unclass/unclass	R=2945#unclass/unclass	131	6	3	6	9.93403	8.9	0.280753	0	0.135007	0	717	119.5	126	0.000473368
R=2950	unclass	unclass	unclass/unclass	R=2950#unclass/unclass	240	21	3	21	12.4958	12.5	6.60377	0	2.05123	3.8	3847	183.19	206	0.00253982
R=2955	unclass	unclass	unclass/unclass	R=2955#unclass/unclass	71	12	6	12	8.53808	8.85	0.598204	1.95	5.33617	0	835	69.5833	71	0.000551273
R=296.chkTE	unclass	unclass	unclass/unclass	R=296.chkTE#unclass/unclass	390	45	13	44	8.50498	8	3.14679	0.5	0.940112	1.7	15043	334.289	421	0.0099315
R=2961	unclass	unclass	unclass/unclass	R=2961#unclass/unclass	82	2	0	2	6.34	7.25	0.76	0.95	4	3.65	130	65	65	8.58e-05
R=2963	unclass	unclass	unclass/unclass	R=2963#unclass/unclass	212	5	3	5	12.4157	10	0.100379	0	0.100379	0	1056	211.2	212	0.000697179
R=2965	unclass	unclass	unclass/unclass	R=2965#unclass/unclass	113	4	4	4	3.77701	2.6	0.900223	0	0	0	448	112	113	0.000295773
R=2967	unclass	unclass	unclass/unclass	R=2967#unclass/unclass	112	6	6	6	2.05917	0	0.446154	0	1.06391	0	676	112.667	112	0.0004463
R=2968	unclass	unclass	unclass/unclass	R=2968#unclass/unclass	58	8	7	8	3.68528	3.5	0.218182	0	0	0	462	57.75	58	0.000305016
R=2969.H	DNA	TcMar	DNA/TcMar	R=2969.H#DNA/TcMar	519	54	1	51	22.6392	27.5	3.42579	3	2.94591	3.15	14790	273.889	222	0.00976446
R=297	unclass	unclass	unclass/unclass	R=297#unclass/unclass	251	30	15	29	10.6558	10.6	2.73356	1.2	2.65675	1.6	6529	217.633	244	0.00431049	100	6.6e-05
R=2971	unclass	unclass	unclass/unclass	R=2971#unclass/unclass	102	12	5	12	6.8821	5	1.01836	1.15	3.01753	0	1084	90.3333	100	0.000715664
R=2972	unclass	unclass	unclass/unclass	R=2972#unclass/unclass	135	5	5	5	0	0	0	0	0	0	675	135	135	0.00044564
R=2978	unclass	unclass	unclass/unclass	R=2978#unclass/unclass	78	5	5	5	0	0	0	0	0	0	390	78	78	0.000257481
R=2979	unclass	unclass	unclass/unclass	R=2979#unclass/unclass	55	4	3	4	5.03779	3.6	0	0	0	0	217	54.25	55	0.000143265
R=2980	unclass	unclass	unclass/unclass	R=2980#unclass/unclass	76	7	6	7	8.77752	6.7	0.560762	0	0	0	525	75	76	0.000346609
R=2982	unclass	unclass	unclass/unclass	R=2982#unclass/unclass	65	10	5	10	8.58206	8	1.6701	0	1.20963	0	602	60.2	62.5	0.000397445
R=2990	unclass	unclass	unclass/unclass	R=2990#unclass/unclass	55	12	10	12	10.4738	11.9	0.157846	0	0	0	650	54.1667	55	0.000429135
R=2992	unclass	unclass	unclass/unclass	R=2992#unclass/unclass	314	12	3	11	10.9063	16.7	1.53706	0	1.02056	0.3	2145	178.75	175.5	0.00141614
R=2994	DNA	Merlin	DNA/Merlin	R=2994#DNA/Merlin	150	2	0	2	16.1296	18.5	1.06986	1.35	0.785352	0.85	355	177.5	177.5	0.000234374
R=2995	unclass	unclass	unclass/unclass	R=2995#unclass/unclass	69	7	5	7	5.63054	5.8	0	0	0	0	478	68.2857	69	0.000315579
R=2996.chkTE	unclass	unclass	unclass/unclass	R=2996.chkTE#unclass/unclass	402	6	5	6	12.3448	10.25	0.97257	0	1.24476	0	2377	396.167	402	0.00156931
R=2997	unclass	unclass	unclass/unclass	R=2997#unclass/unclass	53	5	3	5	6.33423	9.4	0	0	1.67731	0	260	52	53	0.000171654
R=3002	unclass	unclass	unclass/unclass	R=3002#unclass/unclass	92	9	5	9	8.88793	5.4	0.15098	0	0.631373	0	663	73.6667	91	0.000437717
R=3003	unclass	unclass	unclass/unclass	R=3003#unclass/unclass	117	5	5	5	3.07836	3.4	0	0	0.344634	0	587	117.4	117	0.000387542
R=3004.chkTE	unclass	unclass	unclass/unclass	R=3004.chkTE#unclass/unclass	297	4	4	4	1.65059	1.55	0.925338	0	0.602027	0.65	1184	296	296.5	0.000781685
R=3009	unclass	unclass	unclass/unclass	R=3009#unclass/unclass	80	3	3	3	3.33333	0	0	0	0	0	240	80	80	0.00015845
R=3012	unclass	unclass	unclass/unclass	R=3012#unclass/unclass	266	10	5	9	14.1422	14.75	2.15251	0	1.0089	0.95	2135	213.5	253.5	0.00140954
R=3015	unclass	unclass	unclass/unclass	R=3015#unclass/unclass	60	8	4	8	13.7448	13.65	0	0	0	0	451	56.375	59.5	0.000297753
R=3018	unclass	unclass	unclass/unclass	R=3018#unclass/unclass	135	5	3	5	6.91184	6.7	0.165789	0	0	0	608	121.6	135	0.000401406
R=3022	unclass	unclass	unclass/unclass	R=3022#unclass/unclass	77	5	2	5	13.9039	18.6	0	0	0.283102	0	361	72.2	75	0.000238335
R=3024	unclass	unclass	unclass/unclass	R=3024#unclass/unclass	178	9	6	9	4.51078	3.9	0.190721	0	0.565141	0	1595	177.222	178	0.00105303
R=3026	unclass	unclass	unclass/unclass	R=3026#unclass/unclass	156	6	3	6	6.89476	8.65	0	0	0	0	840	140	155.5	0.000554574
R=3027	unclass	unclass	unclass/unclass	R=3027#unclass/unclass	287	9	6	9	5.52213	4.9	0.269683	0	0.604674	0.3	2332	259.111	286	0.0015396
R=3028	unclass	unclass	unclass/unclass	R=3028#unclass/unclass	52	12	4	12	6.77656	2.95	0	0	0	0	576	48	49	0.000380279
R=3029.chkTE	unclass	unclass	unclass/unclass	R=3029.chkTE#unclass/unclass	463	7	5	7	14.6449	19.7	0.199047	0	0.440878	0	2938	419.714	463	0.00193969
R=3032	unclass	unclass	unclass/unclass	R=3032#unclass/unclass	178	10	8	9	12.4838	12.1	0.50566	0	0.120755	0	1590	159	178	0.00104973
R=304.chkTE	unclass	unclass	unclass/unclass	R=304.chkTE#unclass/unclass	363	52	2	51	10.6864	12.45	4.18799	1.25	3.0121	2.2	12583	241.981	183.5	0.00830739
R=3042	DNA	Merlin	DNA/Merlin	R=3042#DNA/Merlin	88	7	5	7	6.9799	5.7	0	0	0	0	572	81.7143	88	0.000377638
R=3043.chkTE	unclass	unclass	unclass/unclass	R=3043.chkTE#unclass/unclass	147	3	1	3	7.18008	9.7	5.95658	3.4	1.2015	0.4	532	177.333	188	0.00035123
R=3044	unclass	unclass	unclass/unclass	R=3044#unclass/unclass	54	3	3	3	12.9667	7.4	0	0	0	0	162	54	54	0.000106954
R=3046	unclass	unclass	unclass/unclass	R=3046#unclass/unclass	165	20	6	20	22.3771	26.95	1.77612	1.2	1.56322	1.2	2852	142.6	163	0.00188291
R=3047	unclass	unclass	unclass/unclass	R=3047#unclass/unclass	115	7	4	7	7.62724	2.6	0.673171	0	0.403659	0	738	105.429	115	0.000487233
R=3048	unclass	unclass	unclass/unclass	R=3048#unclass/unclass	89	13	5	13	8.83905	8	1.18075	2.2	3.19224	0	1096	84.3077	88	0.000723587
R=3052.H	DNA	TcMar	DNA/TcMar	R=3052.H#DNA/TcMar	289	29	6	26	14.4254	22.7	1.50354	5.8	3.20077	2.1	3894	134.276	106	0.00257085
R=3055	unclass	unclass	unclass/unclass	R=3055#unclass/unclass	64	5	5	5	4.36	4.7	0	0	0	0	320	64	64	0.000211266
R=3056	unclass	unclass	unclass/unclass	R=3056#unclass/unclass	156	11	5	11	12.2027	10.5	1.13459	0	1.18244	0	1327	120.636	137	0.000876095
R=3057	unclass	unclass	unclass/unclass	R=3057#unclass/unclass	98	9	7	9	16.2727	22.6	1.19284	0	1.19284	0	838	93.1111	98	0.000553254
R=3058	DNA	Maverick	DNA/Maverick	R=3058#DNA/Maverick	209	14	2	13	18.0868	20.25	2.79418	1.5	2.274	2.05	3284	234.571	150	0.00216812
R=3059	unclass	unclass	unclass/unclass	R=3059#unclass/unclass	57	4	4	4	0.45	0	0	0	0	0	228	57	57	0.000150527
R=306.chkTE	unclass	unclass	unclass/unclass	R=306.chkTE#unclass/unclass	888	123	4	121	9.3732	8.9	3.04473	1.7	1.8441	2.1	55098	447.951	315	0.0363761	8	5.28e-06
R=3061	unclass	unclass	unclass/unclass	R=3061#unclass/unclass	159	9	7	9	2.57427	2.5	0.142236	0	0.072018	0	1333	148.111	159	0.000880056
R=3065	unclass	unclass	unclass/unclass	R=3065#unclass/unclass	52	5	5	5	5	5.8	0	0	0	0	260	52	52	0.000171654
R=3066	unclass	unclass	unclass/unclass	R=3066#unclass/unclass	73	19	8	19	9.00147	8.6	0.156723	0	2.40162	0	1294	68.1053	73	0.000854308
R=3068	unclass	unclass	unclass/unclass	R=3068#unclass/unclass	70	4	4	4	2.48817	1.4	0.346237	0	0	0	279	69.75	70	0.000184198
R=3070	unclass	unclass	unclass/unclass	R=3070#unclass/unclass	72	4	4	4	0.35	0	0	0	0	0	288	72	72	0.00019014
R=3071	unclass	unclass	unclass/unclass	R=3071#unclass/unclass	196	21	5	21	18.5564	24.3	1.2988	1.1	1.27074	1.1	2840	135.238	122	0.00187499
R=3076	unclass	unclass	unclass/unclass	R=3076#unclass/unclass	89	3	1	3	9.79512	3.5	0.961951	0	0	0	205	68.3333	58	0.000135342
R=3077	unclass	unclass	unclass/unclass	R=3077#unclass/unclass	75	9	6	9	5.1427	6.7	0	0	1.00889	0	630	70	75	0.00041593
R=3090	unclass	unclass	unclass/unclass	R=3090#unclass/unclass	59	3	3	3	2.26667	0	0	0	0	0	177	59	59	0.000116857
R=3091	unclass	unclass	unclass/unclass	R=3091#unclass/unclass	113	2	2	2	4.85	4.85	0	0	0	0	226	113	113	0.000149207
R=3092.H	DNA	TcMar	DNA/TcMar	R=3092.H#DNA/TcMar	138	20	4	20	18.1459	22.1	1.94533	0.8	1.82344	1.55	2312	115.6	123	0.0015264
R=3093	unclass	unclass	unclass/unclass	R=3093#unclass/unclass	138	6	5	6	5.94075	6.55	0.115264	0	0.744231	0	832	138.667	138	0.000549292
R=3096	unclass	unclass	unclass/unclass	R=3096#unclass/unclass	262	20	4	20	9.12592	13.05	3.52164	0	2.32601	7.5	2361	118.05	74	0.00155875
R=3097	unclass	unclass	unclass/unclass	R=3097#unclass/unclass	65	6	6	6	3.58333	1.55	0	0	0	0	390	65	65	0.000257481
R=3099	unclass	unclass	unclass/unclass	R=3099#unclass/unclass	88	3	0	3	19.2741	19.3	0	0	0	0	166	55.3333	56	0.000109594
R=310.chkTE	unclass	unclass	unclass/unclass	R=310.chkTE#unclass/unclass	172	5	0	5	7.16033	7.4	2.26989	3.3	3.55593	3.2	910	182	182	0.000600788
R=3100	unclass	unclass	unclass/unclass	R=3100#unclass/unclass	87	4	4	4	1.74517	1.7	0	0	1.1892	0	352	88	87	0.000232393
R=3102	unclass	unclass	unclass/unclass	R=3102#unclass/unclass	287	5	3	5	4.9234	3.3	0.482877	0	0.617021	0.3	987	197.4	286	0.000651624
R=3105	unclass	unclass	unclass/unclass	R=3105#unclass/unclass	168	4	3	4	6.4	0	1.05	0	1.2	0	672	168	168	0.000443659
R=3107	unclass	unclass	unclass/unclass	R=3107#unclass/unclass	59	4	4	4	5.53574	0.85	0.419574	0	0	0	235	58.75	59	0.000155149
R=3108	unclass	unclass	unclass/unclass	R=3108#unclass/unclass	169	37	6	36	19.2435	20.1	0.724694	0	0.623853	0	5471	147.865	160	0.00361199
R=311	unclass	unclass	unclass/unclass	R=311#unclass/unclass	202	80	13	80	12.8929	13	3.29288	1.5	2.57894	2.45	12829	160.363	181.5	0.0084698
R=3115	unclass	unclass	unclass/unclass	R=3115#unclass/unclass	243	7	3	7	8.52051	5.8	1.04102	0	0.914746	0.4	1336	190.857	240	0.000882037
R=3125	unclass	unclass	unclass/unclass	R=3125#unclass/unclass	66	8	4	8	9.99712	12.9	0	0	0	0	520	65	65.5	0.000343308
R=3127	unclass	unclass	unclass/unclass	R=3127#unclass/unclass	162	4	4	4	5.13777	3.75	0	0	0.941131	0	654	163.5	162.5	0.000431775
R=3129	unclass	unclass	unclass/unclass	R=3129#unclass/unclass	61	8	6	8	0.414437	0	0	0	0	0	471	58.875	61	0.000310958
R=3140	unclass	unclass	unclass/unclass	R=3140#unclass/unclass	75	1	1	1	10.7	10.7	0	0	0	0	75	75	75	4.95e-05
R=3141	unclass	unclass	unclass/unclass	R=3141#unclass/unclass	123	6	6	6	7.24364	6.55	0.949795	0	0	0	731	121.833	123	0.000482611
R=3142	unclass	unclass	unclass/unclass	R=3142#unclass/unclass	70	3	2	3	1.43846	0	0	0	0	0	208	69.3333	70	0.000137323
R=3143	unclass	unclass	unclass/unclass	R=3143#unclass/unclass	150	5	4	5	2.91047	1.9	1.20023	0	0.736628	0	860	172	173	0.000567778
R=3145	unclass	unclass	unclass/unclass	R=3145#unclass/unclass	181	4	2	4	15.0289	15.2	2.85149	0.3	0.593883	0.6	703	175.75	181.5	0.000464126
R=3146	unclass	unclass	unclass/unclass	R=3146#unclass/unclass	52	4	3	4	2.58808	0	0	0	0	0	193	48.25	52	0.00012742
R=3148	unclass	unclass	unclass/unclass	R=3148#unclass/unclass	77	9	5	9	5.25232	3.9	0.152765	0	0.215546	0	669	74.3333	77	0.000441679
R=315.chkTE	unclass	unclass	unclass/unclass	R=315.chkTE#unclass/unclass	171	65	9	65	22.302	22.3	2.9414	2.9	3.24757	2.3	8442	129.877	149	0.00557347
R=3151	unclass	unclass	unclass/unclass	R=3151#unclass/unclass	115	4	3	4	3.57656	3.05	0.229018	0	0	0	448	112	114.5	0.000295773
R=3154	unclass	unclass	unclass/unclass	R=3154#unclass/unclass	56	9	5	9	8.29308	7.3	0.195652	0	1.92411	0	506	56.2222	56	0.000334065
R=3156.chkTE	unclass	unclass	unclass/unclass	R=3156.chkTE#unclass/unclass	235	5	3	5	3.16215	0	1.43557	0	0	0	1313	262.6	266	0.000866852
R=3159	unclass	unclass	unclass/unclass	R=3159#unclass/unclass	578	10	4	10	8.10601	7.3	2.49968	0	0.146296	0	4428	442.8	496.5	0.0029234
R=3161	unclass	unclass	unclass/unclass	R=3161#unclass/unclass	108	10	0	10	25.2406	25.75	1.52629	3.85	4.07876	1.55	4731	473.1	476	0.00312344
R=3162	LINE	L1	LINE/L1	R=3162#LINE/L1	213	4	1	4	14.9699	13.4	0.848014	1.2	1.58377	0	579	144.75	148	0.00038226
R=3166	unclass	unclass	unclass/unclass	R=3166#unclass/unclass	132	6	3	6	12.8954	16.25	0.682632	0	0.682632	0	737	122.833	130.5	0.000486573
R=3167	unclass	unclass	unclass/unclass	R=3167#unclass/unclass	74	9	5	9	9.61817	9	0.628261	0	1.30575	0	644	71.5556	73	0.000425173
R=3169	unclass	unclass	unclass/unclass	R=3169#unclass/unclass	108	6	3	6	6.70295	5.6	0	0	0	0	643	107.167	107.5	0.000424513
R=317	unclass	unclass	unclass/unclass	R=317#unclass/unclass	126	400	18	366	14.1975	13.2	5.18633	2.5	3.4493	3.6	49370	123.425	107	0.0325944
R=3171	unclass	unclass	unclass/unclass	R=3171#unclass/unclass	93	5	4	5	1.95261	1.1	0	0	0	0	460	92	93	0.000303695
R=3172	unclass	unclass	unclass/unclass	R=3172#unclass/unclass	63	3	3	3	4.76667	1.6	0	0	0	0	189	63	63	0.000124779
R=3174	unclass	unclass	unclass/unclass	R=3174#unclass/unclass	53	17	16	17	11.4885	11.3	0	0	0	0	896	52.7059	53	0.000591546
R=3175	unclass	unclass	unclass/unclass	R=3175#unclass/unclass	242	4	4	4	8.875	8.25	0	0	0	0	968	242	242	0.00063908
R=3176	unclass	unclass	unclass/unclass	R=3176#unclass/unclass	106	5	4	5	2.46023	2.8	0.178977	0	0	0	528	105.6	106	0.000348589
R=3178	unclass	unclass	unclass/unclass	R=3178#unclass/unclass	65	6	5	6	3.08226	3.2	0.508997	0	1.09974	0	389	64.8333	65	0.000256821
R=3179	unclass	unclass	unclass/unclass	R=3179#unclass/unclass	62	4	3	4	2.51261	0	0	0	0	0	238	59.5	62	0.000157129
R=318.chkTE	unclass	unclass	unclass/unclass	R=318.chkTE#unclass/unclass	153	87	26	84	10.9343	10.3	1.76768	2.4	3.77676	0	10913	125.437	149	0.00720484
R=3180	unclass	unclass	unclass/unclass	R=3180#unclass/unclass	179	9	5	9	12.0285	6.8	0.22455	0	0.383333	0	1332	148	177	0.000879396
R=3181	unclass	unclass	unclass/unclass	R=3181#unclass/unclass	65	5	4	5	2.19119	1.5	0	0	2.60426	0	329	65.8	65	0.000217208
R=3182	unclass	unclass	unclass/unclass	R=3182#unclass/unclass	79	3	1	3	11.9024	14.8	3.8	0	0	0	210	70	70	0.000138643
R=3183	unclass	unclass	unclass/unclass	R=3183#unclass/unclass	115	11	7	11	9.39232	8.8	0.314042	1.7	2.79791	0	1289	117.182	116	0.000851007
R=3185	unclass	unclass	unclass/unclass	R=3185#unclass/unclass	57	9	6	9	11.0036	10.7	0.399	0	0	0	500	55.5556	57	0.000330104
R=3186	unclass	unclass	unclass/unclass	R=3186#unclass/unclass	189	7	5	7	3.21195	2.6	1.44295	0	2.32223	0	1255	179.286	189	0.00082856
R=3188	unclass	unclass	unclass/unclass	R=3188#unclass/unclass	124	6	6	6	3.63695	4.1	0.53012	0	0.956359	0	747	124.5	124	0.000493175
R=3192	unclass	unclass	unclass/unclass	R=3192#unclass/unclass	80	7	3	7	11.7234	16.9	0	0	0	0	538	76.8571	77	0.000355191
R=3199	unclass	unclass	unclass/unclass	R=3199#unclass/unclass	92	6	6	6	4.7223	4.9	0	0	0.742446	0	556	92.6667	92	0.000367075
R=3203	unclass	unclass	unclass/unclass	R=3203#unclass/unclass	112	5	4	5	5.97846	6.2	0	0	0.550987	0	557	111.4	112	0.000367735
R=3207	unclass	unclass	unclass/unclass	R=3207#unclass/unclass	112	6	4	6	4.5024	2.25	0.147076	0	0	0	667	111.167	112	0.000440358
R=3208	unclass	unclass	unclass/unclass	R=3208#unclass/unclass	115	6	4	6	2.76807	2.2	0.148911	0	0.599565	0	689	114.833	115	0.000454883
R=3209	unclass	unclass	unclass/unclass	R=3209#unclass/unclass	112	10	9	10	7.77298	7.8	2.22628	0	0.464624	0.9	1077	107.7	111.5	0.000711043
R=321.chkTE	DNA	Maverick	DNA/Maverick	R=321.chkTE#DNA/Maverick	405	40	6	40	10.7593	13.5	3.29395	2.35	1.88593	5.6	8144	203.6	150	0.00537673
R=3210	unclass	unclass	unclass/unclass	R=3210#unclass/unclass	91	5	5	5	8.54317	5.8	1.53612	0	1.32291	1.1	454	90.8	91	0.000299734
R=3212	unclass	unclass	unclass/unclass	R=3212#unclass/unclass	64	8	7	8	7.51891	6.25	0.399195	1.6	0.830584	0	497	62.125	64	0.000328123
R=3214	unclass	unclass	unclass/unclass	R=3214#unclass/unclass	147	5	3	5	2.7739	0	0.753869	0	0.461608	0	659	131.8	147	0.000435076
R=3217	unclass	unclass	unclass/unclass	R=3217#unclass/unclass	86	5	5	5	0.94	1.2	0	0	0	0	430	86	86	0.000283889
R=3221	unclass	unclass	unclass/unclass	R=3221#unclass/unclass	144	12	6	12	17.0653	25.55	0.636733	0	0.90995	0	1598	133.167	138.5	0.00105501
R=3222	unclass	unclass	unclass/unclass	R=3222#unclass/unclass	53	669	316	669	11.6805	11.8	0.270684	0	0.21132	0	33869	50.6263	52	0.0223606
R=3224	unclass	unclass	unclass/unclass	R=3224#unclass/unclass	62	5	4	5	5.53247	6.5	0.331169	0	0	0	308	61.6	62	0.000203344
R=3229	unclass	unclass	unclass/unclass	R=3229#unclass/unclass	195	11	4	11	18.179	25.6	0.884567	0	0.742075	0	1918	174.364	182	0.00126628
R=3235	unclass	unclass	unclass/unclass	R=3235#unclass/unclass	132	4	4	4	3.04981	2.3	0.370722	0	0	0	526	131.5	132	0.000347269
R=3237	unclass	unclass	unclass/unclass	R=3237#unclass/unclass	72	4	1	4	9.48235	9.3	0	0	0	0	221	55.25	52	0.000145906
R=324	unclass	unclass	unclass/unclass	R=324#unclass/unclass	96	5	1	5	8.08007	8.1	1.46812	0	0.722826	0	276	55.2	44	0.000182217
R=3240	unclass	unclass	unclass/unclass	R=3240#unclass/unclass	54	5	4	5	7.86119	7.4	0	0	0	0	268	53.6	54	0.000176935
R=3248	unclass	unclass	unclass/unclass	R=3248#unclass/unclass	73	4	2	4	5.04892	5.05	0.361511	0	0	0	278	69.5	70	0.000183538
R=3251	unclass	unclass	unclass/unclass	R=3251#unclass/unclass	53	4	3	4	5.73301	4.7	0.478469	0	0	0	209	52.25	53	0.000137983
R=3253	unclass	unclass	unclass/unclass	R=3253#unclass/unclass	457	10	3	10	19.4915	23.5	1.38462	1.5	1.38519	1.5	4363	436.3	453.5	0.00288048
R=3254	unclass	unclass	unclass/unclass	R=3254#unclass/unclass	104	4	4	4	3.85	2.9	0	0	0	0	416	104	104	0.000274646
R=3256	unclass	unclass	unclass/unclass	R=3256#unclass/unclass	85	4	3	4	3.28018	2.4	0	0	0	0	338	84.5	85	0.00022315
R=3258	unclass	unclass	unclass/unclass	R=3258#unclass/unclass	92	6	5	6	7.16175	6.55	0.373507	0	0.785821	0	536	89.3333	91.5	0.000353871
R=3259	DNA	Merlin	DNA/Merlin	R=3259#DNA/Merlin	80	6	1	6	19.5957	20.85	2.27672	1.9	2.60432	2.05	1018	169.667	178	0.000672091
R=3260	unclass	unclass	unclass/unclass	R=3260#unclass/unclass	51	9	8	9	9.15893	9.8	0.448437	0	0	0	448	49.7778	51	0.000295773
R=3261	unclass	unclass	unclass/unclass	R=3261#unclass/unclass	54	11	7	11	8.52704	5.8	0	0	0	0	588	53.4545	54	0.000388202
R=3262.chkTE	DNA	Maverick	DNA/Maverick	R=3262.chkTE#DNA/Maverick	82	2	2	2	4.85	4.85	0	0	0	0	164	82	82	0.000108274
R=3266.chkTE	unclass	unclass	unclass/unclass	R=3266.chkTE#unclass/unclass	73	4	4	4	1.03072	0.7	0	0	0.353584	0	293	73.25	73	0.000193441
R=3267	unclass	unclass	unclass/unclass	R=3267#unclass/unclass	142	4	2	4	5.70447	1.6	1.36576	0	0.367704	0	514	128.5	138.5	0.000339346
R=3270	unclass	unclass	unclass/unclass	R=3270#unclass/unclass	184	9	6	9	10.302	9.8	1.87078	0	0.528178	0.6	1345	149.444	183	0.000887978
R=3275	unclass	unclass	unclass/unclass	R=3275#unclass/unclass	169	5	5	5	6.1579	6	0.241981	0	0.604245	0	848	169.6	169	0.000559856
R=3276	unclass	unclass	unclass/unclass	R=3276#unclass/unclass	76	11	6	11	9.43795	13.5	0.892949	0	0.513718	0	780	70.9091	75	0.000514962
R=3278	unclass	unclass	unclass/unclass	R=3278#unclass/unclass	53	6	6	6	6.28531	6.6	0	0	0.64125	0	320	53.3333	53	0.000211266
R=3279	unclass	unclass	unclass/unclass	R=3279#unclass/unclass	75	4	3	4	5.4	4	0	0	0.675	0	300	75	75	0.000198062
R=3280	DNA	Merlin	DNA/Merlin	R=3280#DNA/Merlin	344	28	3	26	24.5086	31.35	1.70083	1.65	1.69211	1.4	6764	241.571	227.5	0.00446564
R=3284	unclass	unclass	unclass/unclass	R=3284#unclass/unclass	122	11	9	11	13.705	17.2	0.828842	0	1.87222	0.8	1321	120.091	122	0.000872134
R=3285	unclass	unclass	unclass/unclass	R=3285#unclass/unclass	55	7	7	7	10.6531	12.7	0	0	0.26114	0	386	55.1429	55	0.00025484
R=3286.chkTE	unclass	unclass	unclass/unclass	R=3286.chkTE#unclass/unclass	71	9	9	9	7.87411	7.1	0.151938	1.4	1.11132	0	645	71.6667	71	0.000425834
R=3287	unclass	unclass	unclass/unclass	R=3287#unclass/unclass	137	14	9	13	11.2794	10.95	0.977791	0	0.0559861	0	1729	123.5	136	0.0011415
R=3289	DNA	TcMar	DNA/TcMar	R=3289#DNA/TcMar	187	17	7	16	9.99865	6.2	1.71536	0	1.04592	0.7	2376	139.765	132	0.00156865
R=3295	unclass	unclass	unclass/unclass	R=3295#unclass/unclass	346	11	4	11	15.0872	15.5	0.96677	0.9	0.833484	0.3	3545	322.273	346	0.00234043
R=3296	unclass	unclass	unclass/unclass	R=3296#unclass/unclass	97	3	3	3	0.333333	0	0	0	0	0	291	97	97	0.00019212
R=3299	unclass	unclass	unclass/unclass	R=3299#unclass/unclass	67	9	4	9	11.8882	14.6	0.376426	0	0.376426	0	526	58.4444	66	0.000347269
R=3301	unclass	unclass	unclass/unclass	R=3301#unclass/unclass	63	4	3	4	2.3912	0	0	0	0	0	250	62.5	63	0.000165052
R=3302	unclass	unclass	unclass/unclass	R=3302#unclass/unclass	77	3	3	3	0	0	0	0	0	0	231	77	77	0.000152508
R=3303	unclass	unclass	unclass/unclass	R=3303#unclass/unclass	57	3	3	3	0	0	0	0	0	0	171	57	57	0.000112895
R=3304	unclass	unclass	unclass/unclass	R=3304#unclass/unclass	60	3	3	3	0	0	0	0	0	0	180	60	60	0.000118837
R=3310	unclass	unclass	unclass/unclass	R=3310#unclass/unclass	73	5	3	5	4	0	0	0	0	0	351	70.2	73	0.000231733
R=3311	unclass	unclass	unclass/unclass	R=3311#unclass/unclass	53	2	2	2	0	0	0	0	0	0	106	53	53	7e-05
R=3312	unclass	unclass	unclass/unclass	R=3312#unclass/unclass	56	3	3	3	0	0	0	0	0	0	168	56	56	0.000110915
R=3314.chkTE	unclass	unclass	unclass/unclass	R=3314.chkTE#unclass/unclass	181	5	3	5	4.69559	0	0.147577	0	0	0	681	136.2	181	0.000449601
R=3316	unclass	unclass	unclass/unclass	R=3316#unclass/unclass	110	14	3	14	17.1988	25.9	0.754201	0	0.986983	0	1452	103.714	107.5	0.000958621
R=3319	unclass	unclass	unclass/unclass	R=3319#unclass/unclass	73	3	3	3	0	0	0	0	0	0	219	73	73	0.000144585
R=3320	unclass	unclass	unclass/unclass	R=3320#unclass/unclass	53	3	3	3	0	0	0	0	0	0	159	53	53	0.000104973
R=3323	unclass	unclass	unclass/unclass	R=3323#unclass/unclass	78	4	2	4	22.0302	20.75	1.62341	0.65	0.962353	1.35	850	212.5	216.5	0.000561176
R=3329	unclass	unclass	unclass/unclass	R=3329#unclass/unclass	218	2	2	2	0	0	0	0	0	0	436	218	218	0.00028785
R=3332	unclass	unclass	unclass/unclass	R=3332#unclass/unclass	70	3	3	3	0	0	0	0	0	0	210	70	70	0.000138643
R=3333	unclass	unclass	unclass/unclass	R=3333#unclass/unclass	64	2	2	2	0	0	0	0	0	0	128	64	64	8.45e-05
R=3336	unclass	unclass	unclass/unclass	R=3336#unclass/unclass	100	15	9	15	9.93091	12	3.14629	4	2.82253	3.3	1456	97.0667	98	0.000961261
R=3338	unclass	unclass	unclass/unclass	R=3338#unclass/unclass	74	4	3	4	2.37559	0	0	0	0	0	295	73.75	74	0.000194761
R=3340	unclass	unclass	unclass/unclass	R=3340#unclass/unclass	59	3	3	3	0	0	0	0	0	0	177	59	59	0.000116857
R=3341	unclass	unclass	unclass/unclass	R=3341#unclass/unclass	90	2	2	2	0	0	0	0	0	0	180	90	90	0.000118837
R=3343	unclass	unclass	unclass/unclass	R=3343#unclass/unclass	55	3	3	3	0	0	0	0	0	0	165	55	55	0.000108934
R=3344	unclass	unclass	unclass/unclass	R=3344#unclass/unclass	108	2	2	2	0	0	0	0	0	0	216	108	108	0.000142605
R=3346	unclass	unclass	unclass/unclass	R=3346#unclass/unclass	83	1	0	1	1.6	1.6	3.3	3.3	0	0	61	61	61	4.03e-05
R=3347.check-RbBARI1	DNA	TcMar	DNA/TcMar	R=3347.check-RbBARI1#DNA/TcMar	89	5	3	5	7.98126	0	0.238876	0	1.23419	0	427	85.4	89	0.000281908
R=3348	unclass	unclass	unclass/unclass	R=3348#unclass/unclass	68	4	3	4	0.84	0	0	0	0	0	240	60	68	0.00015845
R=3349	unclass	unclass	unclass/unclass	R=3349#unclass/unclass	50	4	3	4	3.6	0	0	0	0	0	195	48.75	50	0.00012874
R=3355.chkTE	unclass	unclass	unclass/unclass	R=3355.chkTE#unclass/unclass	604	15	2	15	16.3367	23.9	3.75014	6.5	4.44885	5.1	3468	231.2	237	0.0022896
R=3359	unclass	unclass	unclass/unclass	R=3359#unclass/unclass	51	3	3	3	0	0	0	0	0	0	153	51	51	0.000101012
R=3360	unclass	unclass	unclass/unclass	R=3360#unclass/unclass	89	3	3	3	0	0	0	0	0	0	267	89	89	0.000176275
R=3365	unclass	unclass	unclass/unclass	R=3365#unclass/unclass	58	3	3	3	0	0	0	0	0	0	174	58	58	0.000114876
R=3367	unclass	unclass	unclass/unclass	R=3367#unclass/unclass	55	7	5	7	4.71391	7.3	0	0	0	0	381	54.4286	55	0.000251539
R=3368	unclass	unclass	unclass/unclass	R=3368#unclass/unclass	50	6	3	6	8.69306	8.7	0.35	0	0	0	288	48	49	0.00019014
R=3371	unclass	unclass	unclass/unclass	R=3371#unclass/unclass	127	4	3	4	4.60649	0	0.202929	0	0	0	478	119.5	127	0.000315579
R=3373	unclass	unclass	unclass/unclass	R=3373#unclass/unclass	80	4	3	4	3.1	0	0	0	0.7	0	300	75	80	0.000198062
R=3374	unclass	unclass	unclass/unclass	R=3374#unclass/unclass	139	8	6	8	1.50588	0	0.0987464	0	0.493732	0	1037	129.625	139	0.000684635
R=3376	unclass	unclass	unclass/unclass	R=3376#unclass/unclass	57	3	3	3	0	0	0	0	0	0	171	57	57	0.000112895
R=3377	unclass	unclass	unclass/unclass	R=3377#unclass/unclass	68	7	6	7	10.1921	5.9	0	0	0	0	471	67.2857	68	0.000310958
R=3378	unclass	unclass	unclass/unclass	R=3378#unclass/unclass	61	2	2	2	1.65	1.65	0	0	0	0	122	61	61	8.05e-05
R=3379	unclass	unclass	unclass/unclass	R=3379#unclass/unclass	94	2	2	2	0	0	0	0	0	0	188	94	94	0.000124119
R=3380	unclass	unclass	unclass/unclass	R=3380#unclass/unclass	72	1	0	1	21.2	21.2	0	0	0	0	66	66	66	4.36e-05
R=3381	unclass	unclass	unclass/unclass	R=3381#unclass/unclass	57	5	5	5	0.365035	0	0	0	0.365035	0	286	57.2	57	0.000188819
R=3384	unclass	unclass	unclass/unclass	R=3384#unclass/unclass	53	3	3	3	0	0	0	0	0	0	159	53	53	0.000104973
R=3385	unclass	unclass	unclass/unclass	R=3385#unclass/unclass	73	2	2	2	0	0	0	0	0	0	146	73	73	9.64e-05
R=339	unclass	unclass	unclass/unclass	R=339#unclass/unclass	517	29	0	23	20.366	22.7	2.3198	1.1	1.61249	1.1	5555	191.552	147	0.00366745
R=3390	unclass	unclass	unclass/unclass	R=3390#unclass/unclass	53	6	4	6	2.43833	0	0	0	0	0	287	47.8333	53	0.000189479
R=3391.fam11.C	DNA	TcMar-pogo	DNA/TcMar-pogo	R=3391.fam11.C#DNA/TcMar-pogo	1599	22	2	22	12.3795	28	1.32428	0	1.18416	1.2	6602	300.091	112.5	0.00435869
R=3393	unclass	unclass	unclass/unclass	R=3393#unclass/unclass	72	3	3	3	0	0	0	0	0	0	216	72	72	0.000142605
R=3394	unclass	unclass	unclass/unclass	R=3394#unclass/unclass	60	5	3	5	3.06395	0	0	0	0	0	294	58.8	60	0.000194101
R=3395.chkTE	unclass	unclass	unclass/unclass	R=3395.chkTE#unclass/unclass	293	2	2	2	0	0	0	0	0	0	586	293	293	0.000386881
R=3396	unclass	unclass	unclass/unclass	R=3396#unclass/unclass	112	5	3	5	6.80758	0	0.177076	0	0.727978	0	554	110.8	112	0.000365755
R=3401	unclass	unclass	unclass/unclass	R=3401#unclass/unclass	66	4	4	4	0	0	0	0	0	0	264	66	66	0.000174295
R=3402	DNA	TcMar-pogo	DNA/TcMar-pogo	R=3402#DNA/TcMar-pogo	83	2	2	2	0	0	0	0	0	0	166	83	83	0.000109594
R=3405	unclass	unclass	unclass/unclass	R=3405#unclass/unclass	60	3	3	3	0	0	0	0	0	0	180	60	60	0.000118837
R=3406	unclass	unclass	unclass/unclass	R=3406#unclass/unclass	51	5	3	5	5.67045	0	0	0	0	0	247	49.4	51	0.000163071
R=3408	unclass	unclass	unclass/unclass	R=3408#unclass/unclass	57	3	3	3	0	0	0	0	0	0	171	57	57	0.000112895
R=3409	unclass	unclass	unclass/unclass	R=3409#unclass/unclass	75	8	4	8	6.27002	4.15	0	0.7	0.714638	0	567	70.875	74	0.000374337
R=341.chkTE	DNA	TcMar	DNA/TcMar	R=341.chkTE#DNA/TcMar	558	48	2	41	20.4234	18.9	4.45794	2.8	3.17187	3.7	24315	506.562	503.5	0.0160529
R=3411	unclass	unclass	unclass/unclass	R=3411#unclass/unclass	55	3	3	3	0	0	0	0	0	0	165	55	55	0.000108934
R=3412	unclass	unclass	unclass/unclass	R=3412#unclass/unclass	98	6	4	6	5.81607	5.6	2.85286	0	0.861964	0.55	560	93.3333	94	0.000369716
R=3413	unclass	unclass	unclass/unclass	R=3413#unclass/unclass	91	2	2	2	0	0	0	0	0	0	182	91	91	0.000120158
R=3414	unclass	unclass	unclass/unclass	R=3414#unclass/unclass	63	7	5	7	5.37529	0	0	0	0	0	429	61.2857	63	0.000283229
R=3415	unclass	unclass	unclass/unclass	R=3415#unclass/unclass	55	9	4	9	9.26435	14.6	0	0	0	0	432	48	45	0.000285209
R=3416	unclass	unclass	unclass/unclass	R=3416#unclass/unclass	77	10	10	10	1.3	0	0	0	0	0	770	77	77	0.000508359
R=3417	unclass	unclass	unclass/unclass	R=3417#unclass/unclass	55	4	4	4	4.56164	0	0.468493	0	0	0	219	54.75	55	0.000144585
R=3418	unclass	unclass	unclass/unclass	R=3418#unclass/unclass	53	4	4	4	0	0	0	0	0	0	212	53	53	0.000139964
R=3419	unclass	unclass	unclass/unclass	R=3419#unclass/unclass	62	5	0	5	6.03846	5.8	0	0	0.882051	0	468	93.6	92	0.000308977
R=342	unclass	unclass	unclass/unclass	R=342#unclass/unclass	182	76	14	75	9.51555	8.75	2.84744	0	1.23619	1.2	10052	132.263	147.5	0.0066364
R=3420	unclass	unclass	unclass/unclass	R=3420#unclass/unclass	54	4	3	4	3.77358	0	0	0	0	0	212	53	54	0.000139964
R=3423	unclass	unclass	unclass/unclass	R=3423#unclass/unclass	53	3	3	3	0	0	0	0	0	0	159	53	53	0.000104973
R=3424	unclass	unclass	unclass/unclass	R=3424#unclass/unclass	65	3	3	3	0	0	0	0	0	0	195	65	65	0.00012874
R=3425	unclass	unclass	unclass/unclass	R=3425#unclass/unclass	66	2	2	2	0	0	0	0	0	0	132	66	66	8.71e-05
R=3426	unclass	unclass	unclass/unclass	R=3426#unclass/unclass	302	5	3	5	5.63877	0	2.34429	0	0.808098	0	1630	326	302	0.00107614
R=3427	DNA	hAT-Ac	DNA/hAT-Ac	R=3427#DNA/hAT-Ac	393	8	2	8	12.1614	12.2	2.58036	0.65	0.865167	1.2	1823	227.875	223	0.00120356
R=3428	unclass	unclass	unclass/unclass	R=3428#unclass/unclass	54	11	4	11	3.90451	1.9	0	0	0	0	488	44.3636	53	0.000322181
R=3429	unclass	unclass	unclass/unclass	R=3429#unclass/unclass	54	5	3	5	3.38943	0	0	0	0	0	265	53	54	0.000174955
R=343	unclass	unclass	unclass/unclass	R=343#unclass/unclass	69	93	54	93	18.0474	18.8	0.185606	0	0.241531	0	5815	62.5269	69	0.0038391
R=3433	unclass	unclass	unclass/unclass	R=3433#unclass/unclass	58	3	3	3	0	0	0	0	0	0	174	58	58	0.000114876
R=3438	unclass	unclass	unclass/unclass	R=3438#unclass/unclass	51	3	3	3	0	0	0	0	0	0	153	51	51	0.000101012
R=3439	unclass	unclass	unclass/unclass	R=3439#unclass/unclass	150	11	5	10	9.38065	7.3	2.4726	0	2.48259	0	1292	117.455	129	0.000852988
R=344.chkTE	unclass	unclass	unclass/unclass	R=344.chkTE#unclass/unclass	175	26	2	26	9.81438	10.25	2.32634	0	0.682216	0.9	3998	153.769	165	0.00263951
R=3440	unclass	unclass	unclass/unclass	R=3440#unclass/unclass	52	5	5	5	2.7	0	0	0	0	0	260	52	52	0.000171654
R=3441	unclass	unclass	unclass/unclass	R=3441#unclass/unclass	80	1	1	1	0	0	0	0	0	0	80	80	80	5.28e-05
R=3443	unclass	unclass	unclass/unclass	R=3443#unclass/unclass	55	3	3	3	0	0	0	0	0	0	165	55	55	0.000108934
R=3445	unclass	unclass	unclass/unclass	R=3445#unclass/unclass	60	3	3	3	0	0	0	0	0	0	180	60	60	0.000118837
R=3446	unclass	unclass	unclass/unclass	R=3446#unclass/unclass	52	3	3	3	0	0	0	0	0	0	156	52	52	0.000102992
R=3449	unclass	unclass	unclass/unclass	R=3449#unclass/unclass	52	7	6	7	2.58917	0	0.854701	0	0.286895	0	351	50.1429	52	0.000231733
R=3453	unclass	unclass	unclass/unclass	R=3453#unclass/unclass	57	3	3	3	0	0	0	0	0	0	171	57	57	0.000112895
R=3457	unclass	unclass	unclass/unclass	R=3457#unclass/unclass	76	10	3	10	10.5984	16	0.144413	0	0	0	698	69.8	74.5	0.000460825
R=3458	unclass	unclass	unclass/unclass	R=3458#unclass/unclass	52	3	3	3	0	0	0	0	0	0	156	52	52	0.000102992
R=346	unclass	unclass	unclass/unclass	R=346#unclass/unclass	128	103	3	99	14.7231	14.9	2.80149	1.9	2.59435	1.7	10196	98.9903	112	0.00673147
R=3461	unclass	unclass	unclass/unclass	R=3461#unclass/unclass	150	3	3	3	0	0	0	0	0	0	450	150	150	0.000297093
R=3463	unclass	unclass	unclass/unclass	R=3463#unclass/unclass	59	3	3	3	2.26667	0	0	0	0	0	177	59	59	0.000116857
R=3464	unclass	unclass	unclass/unclass	R=3464#unclass/unclass	354	11	3	11	14.5356	26.3	0.890312	1.1	0.923812	0.8	2209	200.818	175	0.0014584
R=3465	unclass	unclass	unclass/unclass	R=3465#unclass/unclass	61	11	10	11	8.83433	9.8	0.452174	0	0	0	667	60.6364	61	0.000440358
R=3466	unclass	unclass	unclass/unclass	R=3466#unclass/unclass	55	3	3	3	0	0	0	0	0	0	165	55	55	0.000108934
R=3467	unclass	unclass	unclass/unclass	R=3467#unclass/unclass	55	4	4	4	1.375	0	0	0	0	0	220	55	55	0.000145246
R=3468	unclass	unclass	unclass/unclass	R=3468#unclass/unclass	60	7	5	7	3.11048	1.7	0	0	0.487143	0	420	60	60	0.000277287
R=3469	unclass	unclass	unclass/unclass	R=3469#unclass/unclass	73	7	4	7	2.7642	1.2	0.52087	0	0.241594	0.3	690	98.5714	88	0.000455543	30	1.98e-05
R=3471	unclass	unclass	unclass/unclass	R=3471#unclass/unclass	51	4	4	4	4	0	0.5	0	0.5	0	204	51	51	0.000134682
R=3472	unclass	unclass	unclass/unclass	R=3472#unclass/unclass	59	4	4	4	3.8	0	0	0	0	0	236	59	59	0.000155809
R=3473	unclass	unclass	unclass/unclass	R=3473#unclass/unclass	67	4	3	4	2.24944	0	0	0	0	0	267	66.75	67	0.000176275
R=3474	unclass	unclass	unclass/unclass	R=3474#unclass/unclass	74	5	3	5	5.69494	0	0	0	0	0	316	63.2	74	0.000208625
R=3475	unclass	unclass	unclass/unclass	R=3475#unclass/unclass	63	7	5	7	3.59214	0	2.13762	0	1.2231	0	420	60	63	0.000277287
R=3476	unclass	unclass	unclass/unclass	R=3476#unclass/unclass	74	7	5	7	7.88543	4	0	0	0	0	494	70.5714	74	0.000326142
R=3478	DNA	TcMar-pogo	DNA/TcMar-pogo	R=3478#DNA/TcMar-pogo	95	5	3	5	22.3391	15.4	4.66068	5	4.79005	2.4	1648	329.6	95	0.00108802
R=3479	unclass	unclass	unclass/unclass	R=3479#unclass/unclass	94	3	3	3	4.38601	0	0	0	1.47343	0	286	95.3333	94	0.000188819
R=348	unclass	unclass	unclass/unclass	R=348#unclass/unclass	87	1	0	1	6.1	6.1	3	3	0	0	33	33	33	2.18e-05
R=3480	unclass	unclass	unclass/unclass	R=3480#unclass/unclass	53	4	4	4	0.95	0	0	0	0	0	212	53	53	0.000139964
R=3481.fam3.2TIR.C.intact	DNA	piggyBac	DNA/piggyBac	R=3481.fam3.2TIR.C.intact#DNA/piggyBac	1996	77	1	71	21.6627	27.9	3.10892	3	3.15564	3.5	28936	375.792	192	0.0191038
R=3484	unclass	unclass	unclass/unclass	R=3484#unclass/unclass	84	2	1	2	0	0	0	0	0	0	135	67.5	67.5	8.91e-05
R=3485	unclass	unclass	unclass/unclass	R=3485#unclass/unclass	144	3	3	3	0	0	0	0	0	0	432	144	144	0.000285209
R=3490	unclass	unclass	unclass/unclass	R=3490#unclass/unclass	144	2	2	2	0	0	0	0	0	0	288	144	144	0.00019014
R=3491	unclass	unclass	unclass/unclass	R=3491#unclass/unclass	57	11	10	11	5.65606	5.4	0.162843	0	0	0	619	56.2727	57	0.000408668
R=3493	unclass	unclass	unclass/unclass	R=3493#unclass/unclass	50	12	3	12	11.0284	15.45	0	0	0	0	571	47.5833	49	0.000376978
R=3494	unclass	unclass	unclass/unclass	R=3494#unclass/unclass	55	5	4	5	2.30805	0	0	0	0	0	261	52.2	55	0.000172314
R=3495	unclass	unclass	unclass/unclass	R=3495#unclass/unclass	64	3	3	3	0	0	0	0	0	0	192	64	64	0.00012676
R=356.chkTE	unclass	unclass	unclass/unclass	R=356.chkTE#unclass/unclass	256	19	0	19	1.29505	0	1.86288	0	0.200598	0	3009	158.368	180	0.00198656
R=359	unclass	unclass	unclass/unclass	R=359#unclass/unclass	60	18	7	18	8.94956	8.65	0	0	0.945015	0	1013	56.2778	57.5	0.00066879
R=360	unclass	unclass	unclass/unclass	R=360#unclass/unclass	108	6	1	6	8.71465	8	1.54058	3.65	5.28374	0.9	621	103.5	106	0.000409989
R=361	unclass	unclass	unclass/unclass	R=361#unclass/unclass	194	55	17	55	10.9751	11.2	3.19943	1	1.59336	1.1	8431	153.291	172	0.00556621
R=367	unclass	unclass	unclass/unclass	R=367#unclass/unclass	166	26	10	26	16.8252	16.9	3.53678	2.5	2.77123	1.95	3643	140.115	162.5	0.00240513
R=369	unclass	unclass	unclass/unclass	R=369#unclass/unclass	69	15	3	15	11.9943	12.7	1.15445	0	0.315254	0	944	62.9333	64	0.000623235
R=370.chkTE	unclass	unclass	unclass/unclass	R=370.chkTE#unclass/unclass	74	10	1	10	12.6359	11.2	1.98104	4.55	4.2318	0	654	65.4	66.5	0.000431775
R=371	unclass	unclass	unclass/unclass	R=371#unclass/unclass	166	33	10	32	12.4755	12.5	3.49151	1.1	1.67507	1.7	4549	137.848	157	0.00300328
R=372	unclass	unclass	unclass/unclass	R=372#unclass/unclass	344	65	20	64	8.82098	9	1.63486	0.7	1.65567	0.6	15356	236.246	288	0.0101381	6	3.96e-06
R=374	unclass	unclass	unclass/unclass	R=374#unclass/unclass	99	11	4	11	6.8515	6.1	0.0997101	0	1.19072	0	1035	94.0909	99	0.000683314
R=388.chkTE	unclass	unclass	unclass/unclass	R=388.chkTE#unclass/unclass	185	48	25	48	9.33984	10.05	3.03929	0.4	0.921479	0.85	8008	166.833	191	0.00528694
R=389	unclass	unclass	unclass/unclass	R=389#unclass/unclass	135	2	0	2	18.5	18.5	2.4	4.05	5.7	4.05	252	126	126	0.000166372
R=391	DNA	Tlr	DNA/Tlr	R=391#DNA/Tlr	142	39	2	39	15.9936	15.6	1.51726	2.1	3.77811	0.7	4728	121.231	129	0.00312146
R=393.chkTE	unclass	unclass	unclass/unclass	R=393.chkTE#unclass/unclass	191	40	2	40	9.36652	8.75	2.70666	2.45	3.64403	0.75	6018	150.45	163.5	0.00397313
R=500	unclass	unclass	unclass/unclass	R=500#unclass/unclass	180	57	11	55	9.95035	12.3	3.64849	0.8	1.06577	3	5492	96.3509	91	0.00362586	1016	0.00067077
R=504	DNA	Tlr	DNA/Tlr	R=504#DNA/Tlr	1325	24	4	22	7.10457	6.15	0.692094	0.1	0.329449	0.35	19719	821.625	739	0.0130186	3	1.98e-06
R=507	unclass	unclass	unclass/unclass	R=507#unclass/unclass	141	43	26	43	6.85567	6.5	2.88063	0.8	2.50686	0.8	6578	152.977	170	0.00434284
R=508	DNA	TcMar	DNA/TcMar	R=508#DNA/TcMar	735	40	1	40	12.8925	15.5	4.22002	0.65	1.28845	2.65	13129	328.225	217	0.00866786
R=512	DNA	TcMar	DNA/TcMar	R=512#DNA/TcMar	139	17	9	17	12.1758	10.8	0.42691	0	2.1411	0	2107	123.941	139	0.00139106
R=514.chkTE	unclass	unclass	unclass/unclass	R=514.chkTE#unclass/unclass	255	33	13	33	8.01151	6.8	3.1411	3.1	3.32534	2.1	6436	195.03	227	0.00424909
R=516	unclass	unclass	unclass/unclass	R=516#unclass/unclass	135	33	15	32	4.7856	5.2	0.397514	0	0.689482	0	3299	99.9697	93	0.00217802
R=519	unclass	unclass	unclass/unclass	R=519#unclass/unclass	335	25	13	24	8.8254	8.2	1.04224	1.6	1.70846	0.3	6134	245.36	328	0.00404971
R=522	unclass	unclass	unclass/unclass	R=522#unclass/unclass	270	2	0	2	13.8747	13.45	4.90988	0.5	2.52469	6.5	162	81	81	0.000106954
R=523.C	DNA	MITE	DNA/MITE	R=523.C#DNA/MITE	470	474	49	455	8.62064	8.9	4.20171	2.6	3.49064	2.8	187463	395.492	461	0.123764	378	0.000249558
R=53.chkTE	DNA	MITE	DNA/MITE	R=53.chkTE#DNA/MITE	393	74	0	73	11.2554	11.4	3.69362	3	4.75584	1.2	8531	115.284	95	0.00563223
R=533.chkTE	unclass	unclass	unclass/unclass	R=533.chkTE#unclass/unclass	548	12	0	12	12.2512	12.6	1.90188	5.15	6.0588	0.9	1910	159.167	167	0.00126099
R=536	unclass	unclass	unclass/unclass	R=536#unclass/unclass	248	19	0	19	11.6285	10.7	5.00841	2.4	3.94764	5	3151	165.842	149	0.00208031
R=544	unclass	unclass	unclass/unclass	R=544#unclass/unclass	382	42	8	39	14.1658	23.3	1.93318	2.15	2.27192	2.3	8425	200.595	178	0.00556224
R=548	unclass	unclass	unclass/unclass	R=548#unclass/unclass	140	39	10	39	11.0451	11.4	0.897587	0	0.409355	0	4682	120.051	136	0.00309109
R=549.chkTE	unclass	unclass	unclass/unclass	R=549.chkTE#unclass/unclass	178	20	7	20	10.0059	9.9	2.10227	1.1	2.69092	0	2599	129.95	118	0.00171588
R=55	unclass	unclass	unclass/unclass	R=55#unclass/unclass	491	73	2	71	21.9037	22.1	3.12712	4	4.59825	2.3	23799	326.014	383	0.0157123	2927	0.00193243
R=553	DNA	Maverick-Tlr	DNA/Maverick-Tlr	R=553#DNA/Maverick-Tlr	874	87	1	83	18.2179	21.9	2.20494	1.3	2.14692	1.6	21357	245.483	165	0.0141
R=555.chkTE	unclass	unclass	unclass/unclass	R=555.chkTE#unclass/unclass	83	147	13	147	13.489	12.8	1.89828	0	2.78996	0	10056	68.4082	64	0.00663904
R=557	unclass	unclass	unclass/unclass	R=557#unclass/unclass	191	24	7	24	9.21398	10.2	1.51173	0.85	1.50466	0	4099	170.792	184.5	0.00270619
R=559	unclass	unclass	unclass/unclass	R=559#unclass/unclass	174	121	39	121	14.3816	17.3	2.33297	1.5	1.87507	1.1	17340	143.306	160	0.011448
R=56.chkTE	unclass	unclass	unclass/unclass	R=56.chkTE#unclass/unclass	412	75	0	74	15.835	15.9	3.82588	1.9	2.77905	2.9	22778	303.707	338	0.0150382
R=562	unclass	unclass	unclass/unclass	R=562#unclass/unclass	80	16	10	16	9.46661	10.8	0.0836966	0	0.697384	0	1147	71.6875	80	0.000757257
R=563.small.chkTE	unclass	unclass	unclass/unclass	R=563.small.chkTE#unclass/unclass	184	90	2	90	14.885	15.05	5.62751	3.35	3.78603	4.45	10780	119.778	112.5	0.00711703
R=564	unclass	unclass	unclass/unclass	R=564#unclass/unclass	178	30	6	30	15.0321	15.3	1.24208	0.6	0.777273	0	4268	142.267	168	0.00281776
R=566	unclass	unclass	unclass/unclass	R=566#unclass/unclass	215	36	8	34	12.2605	12	1.48048	0.75	1.16741	1.2	4913	136.472	146	0.0032436	28	1.85e-05
R=570.H	DNA	TcMar	DNA/TcMar	R=570.H#DNA/TcMar	315	41	6	40	15.4334	24.6	2.89767	1.3	1.6615	1.4	6984	170.341	140	0.00461089
R=575	unclass	unclass	unclass/unclass	R=575#unclass/unclass	179	14	10	14	6.72121	5.3	2.61918	0.6	1.30078	0.65	2565	183.214	187.5	0.00169343
R=579	unclass	unclass	unclass/unclass	R=579#unclass/unclass	421	20	9	20	8.95341	4.2	1.89544	0.2	1.1438	1.35	6561	328.05	377.5	0.00433162
R=580.H	DNA	Maverick	DNA/Maverick	R=580.H#DNA/Maverick	834	93	7	91	20.2978	24.4	3.42082	0.9	1.52158	3.3	37624	404.559	388	0.0248396	33	2.18e-05
R=581	unclass	unclass	unclass/unclass	R=581#unclass/unclass	259	56	7	55	12.2171	7.2	2.37799	1	2.48692	2.3	10411	185.911	176.5	0.00687342
R=584	unclass	unclass	unclass/unclass	R=584#unclass/unclass	95	9	3	9	11.7642	11.8	1.90091	0	4.48097	1.8	662	73.5556	75	0.000437057
R=588.chkTE	unclass	unclass	unclass/unclass	R=588.chkTE#unclass/unclass	107	16	0	16	10.9135	10.05	3.08003	0	0.918708	1.9	1192	74.5	66	0.000786967
R=590	unclass	unclass	unclass/unclass	R=590#unclass/unclass	284	84	3	84	14.0524	14.1	4.94121	0.7	1.58017	3.05	16704	198.857	209	0.0110281
R=595	unclass	unclass	unclass/unclass	R=595#unclass/unclass	77	26	14	26	16.8183	16.45	0.345768	0	0.953421	0	1973	75.8846	77	0.00130259
R=596	unclass	unclass	unclass/unclass	R=596#unclass/unclass	173	42	1	41	11.9513	10.45	2.68213	2.8	5.30673	1.7	5479	130.452	132.5	0.00361727
R=598.chkTE	DNA	Maverick-Tlr	DNA/Maverick-Tlr	R=598.chkTE#DNA/Maverick-Tlr	277	13	7	12	9.19607	5.8	1.06624	0.8	3.56414	1.4	3051	234.692	276	0.00201429
R=6.check-RbGYPSY-I_MT	unclass	unclass	unclass/unclass	R=6.check-RbGYPSY-I_MT#unclass/unclass	506	4145	149	3651	14.7748	17.9	5.29319	3.5	3.48393	4.7	1028207	248.06	233	0.67883	211	0.000139304
R=60.chkTE	unclass	unclass	unclass/unclass	R=60.chkTE#unclass/unclass	559	1501	145	1428	9.57633	8.9	4.56414	1.8	2.77186	3	500062	333.153	351	0.330144	242	0.00015977
R=600	unclass	unclass	unclass/unclass	R=600#unclass/unclass	270	138	35	138	15.891	16.15	5.36101	1.6	2.10457	2.9	27480	199.13	227.5	0.0181425	1757	0.00115998
R=62.chkTE	unclass	unclass	unclass/unclass	R=62.chkTE#unclass/unclass	1045	144	0	135	13.426	12.55	3.18667	1.8	2.29726	1.8	66078	458.875	380.5	0.0436252	39	2.57e-05
R=620.check-RbtRNA-Val-GTA	unclass	unclass	unclass/unclass	R=620.check-RbtRNA-Val-GTA#unclass/unclass	86	29	4	29	2.7653	0	0.128227	0	0.26204	0	2363	81.4828	81	0.00156007
R=621.chkTE	unclass	unclass	unclass/unclass	R=621.chkTE#unclass/unclass	213	171	9	169	12.0886	12.3	6.8178	1.5	2.46411	4.8	26023	152.181	173	0.0171806
R=624	unclass	unclass	unclass/unclass	R=624#unclass/unclass	168	83	13	83	13.6168	11.6	2.05978	0	1.32661	1	10035	120.904	121	0.00662518
R=625	unclass	unclass	unclass/unclass	R=625#unclass/unclass	84	12	8	12	2.97261	1.8	0	0	1.24955	0	993	82.75	84	0.000655586
R=627.H.1end	DNA	hAT-Ac	DNA/hAT-Ac	R=627.H.1end#DNA/hAT-Ac	1275	10	6	10	1.46273	0.1	0.11117	0	0.11117	0	8102	810.2	1275	0.005349
R=629.chkTE	unclass	unclass	unclass/unclass	R=629.chkTE#unclass/unclass	105	33	5	33	8.38476	8	1.58713	4	4.07799	1.6	5789	175.424	181	0.00382194
R=634	DNA	Tlr	DNA/Tlr	R=634#DNA/Tlr	206	34	13	34	17.2182	16.4	2.7349	3.4	4.20389	2.75	5995	176.324	203.5	0.00395794
R=640	unclass	unclass	unclass/unclass	R=640#unclass/unclass	98	89	24	89	8.3754	7.8	3.06563	4.1	5.32326	1.6	7503	84.3034	88	0.00495353
R=644.chkTE	unclass	unclass	unclass/unclass	R=644.chkTE#unclass/unclass	93	54	13	54	13.3514	13.15	1.46339	2.5	3.62198	0	4922	91.1481	94	0.00324954
R=645	unclass	unclass	unclass/unclass	R=645#unclass/unclass	272	44	12	43	10.2586	11.6	4.68805	0.5	1.60839	1.7	7532	171.182	167	0.00497268
R=648.chkTE	unclass	unclass	unclass/unclass	R=648.chkTE#unclass/unclass	410	28	7	28	17.3327	16.05	1.8197	0.25	1.43247	0.25	7071	252.536	260	0.00466832
R=65	DNA	MITE	DNA/MITE	R=65#DNA/MITE	150	20	0	20	13.6068	12.6	3.07798	2.4	3.40486	2.25	1894	94.7	115.5	0.00125043
R=650	unclass	unclass	unclass/unclass	R=650#unclass/unclass	341	19	8	17	6.5212	6.4	1.90007	0	0.230835	0.3	4430	233.158	237	0.00292472
R=653	unclass	unclass	unclass/unclass	R=653#unclass/unclass	65	235	97	235	10.6914	10.4	1.01823	1.9	2.31716	0.7	15765	67.0851	66	0.0104082
R=654	unclass	unclass	unclass/unclass	R=654#unclass/unclass	303	17	3	17	9.64595	10.6	0.821547	0.5	0.587892	0	3634	213.765	202	0.00239919
R=656	DNA	TcMar-pogo	DNA/TcMar-pogo	R=656#DNA/TcMar-pogo	938	36	6	35	16.9217	26.25	3.47099	3.9	3.17016	4.25	19846	551.278	518.5	0.0131025
R=659	unclass	unclass	unclass/unclass	R=659#unclass/unclass	320	25	6	25	12.8363	12.8	1.11348	0.3	2.16311	0.6	6631	265.24	302	0.00437783
R=660	DNA	Tlr?	DNA/Tlr?	R=660#DNA/Tlr?	238	41	0	41	7.36907	7.3	2.20887	0	0.69491	0	5933	144.707	163	0.00391701
R=663	DNA	Maverick-Tlr	DNA/Maverick-Tlr	R=663#DNA/Maverick-Tlr	376	5	0	5	15.3577	15.5	1.01848	0	1.24542	0.3	698	139.6	88	0.000460825
R=668	unclass	unclass	unclass/unclass	R=668#unclass/unclass	76	75	39	75	7.73899	7.3	3.81708	0	2.33359	1.4	5335	71.1333	73	0.00352221	77	5.08e-05
R=669	unclass	unclass	unclass/unclass	R=669#unclass/unclass	181	35	3	34	13.5707	13.6	2.71499	1.1	1.41501	1.8	7556	215.886	181	0.00498852
R=67	unclass	unclass	unclass/unclass	R=67#unclass/unclass	223	123	6	121	4.52807	3.6	0.378761	0	0.302089	0	17327	140.87	152	0.0114394	651	0.000429795
R=670.small.chkTE	unclass	unclass	unclass/unclass	R=670.small.chkTE#unclass/unclass	218	54	8	52	19.6318	19.9	3.57451	3.45	3.46765	3.3	7450	137.963	128	0.00491854
R=671.check-RbMariner-20_DF	DNA	TcMar	DNA/TcMar	R=671.check-RbMariner-20_DF#DNA/TcMar	105	20	2	15	20.4447	22.6	2.02491	2.45	2.42088	2.05	1935	96.75	84.5	0.0012775
R=676.chkTE	unclass	unclass	unclass/unclass	R=676.chkTE#unclass/unclass	91	219	17	219	20.0898	20	0.820088	1.3	3.09263	0	17309	79.0365	81	0.0114275
R=69.chkTE	unclass	unclass	unclass/unclass	R=69.chkTE#unclass/unclass	185	244	10	242	13.102	12.5	2.88639	1.3	2.84769	1.2	28398	116.385	114.5	0.0187486	116	7.66e-05
R=690	unclass	unclass	unclass/unclass	R=690#unclass/unclass	87	19	8	19	5.31347	4.7	2.77987	0	0.38363	0	1515	79.7368	85	0.00100021
R=691	unclass	unclass	unclass/unclass	R=691#unclass/unclass	121	9	7	9	0.275024	0	0	0	0	0	1053	117	121	0.000695198
R=693	unclass	unclass	unclass/unclass	R=693#unclass/unclass	143	51	6	51	12.8834	12.9	4.7028	1	1.22058	2.2	6080	119.216	134	0.00401406
R=694.chkTE	unclass	unclass	unclass/unclass	R=694.chkTE#unclass/unclass	86	3	3	3	3.95197	3.5	1.58189	0	0	0	254	84.6667	86	0.000167693
R=695	unclass	unclass	unclass/unclass	R=695#unclass/unclass	147	34	3	34	5.8534	5.8	1.50603	0	1.21179	0	3249	95.5588	93	0.00214501
R=696.chkTE	unclass	unclass	unclass/unclass	R=696.chkTE#unclass/unclass	222	5	0	5	8.8228	9	5.68456	4.7	4.8538	4.3	829	165.8	171	0.000547312
R=697	DNA	Maverick-Tlr	DNA/Maverick-Tlr	R=697#DNA/Maverick-Tlr	218	23	8	23	14.0654	14.2	1.84114	0	0.8486	0.5	4144	180.174	189	0.0027359
R=7	DNA	Tlr?	DNA/Tlr?	R=7#DNA/Tlr?	703	930	10	921	15.8596	15.7	5.85725	3.9	4.58799	5	369328	397.127	400.5	0.243833	174	0.000114876
R=700	unclass	unclass	unclass/unclass	R=700#unclass/unclass	96	90	11	90	14.8033	14.8	1.2221	1.4	3.92776	0.45	7177	79.7444	85	0.00473831
R=703	unclass	unclass	unclass/unclass	R=703#unclass/unclass	67	45	12	45	8.58147	8.5	1.46982	0	0.352247	0	2515	55.8889	53	0.00166042	8	5.28e-06
R=710.chkTE	unclass	unclass	unclass/unclass	R=710.chkTE#unclass/unclass	154	21	13	21	11.0638	11.2	3.90169	2.6	3.01482	2.8	3076	146.476	152	0.0020308
R=713.check-RbDada-tY_PMar	unclass	unclass	unclass/unclass	R=713.check-RbDada-tY_PMar#unclass/unclass	111	38	2	38	13.8638	21.85	8.09632	0	0.0836703	14	3264	85.8947	78	0.00215492
R=714	DNA	Maverick	DNA/Maverick	R=714#DNA/Maverick	238	32	12	31	12.2635	13	3.06629	0	1.16832	1.1	5723	178.844	207	0.00377837
R=719	DNA	Tlr	DNA/Tlr	R=719#DNA/Tlr	177	15	7	15	6.525	5.1	0.467716	0	0.0490601	0	2128	141.867	174	0.00140492
R=72	DNA	TcMar	DNA/TcMar	R=72#DNA/TcMar	642	192	7	182	11.5312	11.2	2.78276	1.6	2.50578	1.75	67389	350.984	330	0.0444907	4	2.64e-06
R=720.H	DNA	TcMar	DNA/TcMar	R=720.H#DNA/TcMar	736	74	1	72	22.615	27.35	3.176	3	2.84449	3.1	29514	398.838	275.5	0.0194854
R=722	unclass	unclass	unclass/unclass	R=722#unclass/unclass	128	25	11	25	9.00942	5.8	1.59169	0	0.682816	0	2962	118.48	121	0.00195553
R=726	unclass	unclass	unclass/unclass	R=726#unclass/unclass	267	47	0	46	9.97366	10.9	3.23722	1.4	3.78626	1	7358	156.553	153	0.0048578	32	2.11e-05
R=73.chkTE	unclass	unclass	unclass/unclass	R=73.chkTE#unclass/unclass	800	55	0	55	9.21519	8.9	1.5322	0.3	1.09112	0.5	22444	408.073	363	0.0148177
R=732	unclass	unclass	unclass/unclass	R=732#unclass/unclass	102	3	1	3	9.37398	9.8	5.96926	5.4	1.56025	0.6	488	162.667	141	0.000322181
R=739	unclass	unclass	unclass/unclass	R=739#unclass/unclass	140	60	13	60	8.36074	8.7	1.80611	0	0.9585	0.7	6747	112.45	126.5	0.00445442
R=74.chkTE	unclass	unclass	unclass/unclass	R=74.chkTE#unclass/unclass	418	522	1	514	16.0875	16.15	5.19074	3.8	4.39786	4.35	151527	290.282	283.5	0.100039	48	3.17e-05
R=742	unclass	unclass	unclass/unclass	R=742#unclass/unclass	143	27	2	27	10.1022	7.3	1.11434	0	0.887177	0.7	3291	121.889	135	0.00217274
R=745	unclass	unclass	unclass/unclass	R=745#unclass/unclass	55	30	13	30	5.74439	3.9	0.784811	0	0.273794	0	1534	51.1333	54	0.00101276
R=747.H	DNA	TcMar	DNA/TcMar	R=747.H#DNA/TcMar	1022	53	3	50	17.2008	18.9	3.29264	2.2	2.16698	3.5	16491	311.151	173	0.0108875	22	1.45e-05
R=749	unclass	unclass	unclass/unclass	R=749#unclass/unclass	163	19	12	19	5.01556	4.4	8.8953	0	0.660776	0.7	2552	134.316	136	0.00168485
R=75	unclass	unclass	unclass/unclass	R=75#unclass/unclass	97	1	0	1	6	6	0	0	0	0	50	50	50	3.3e-05
R=755	unclass	unclass	unclass/unclass	R=755#unclass/unclass	474	42	9	40	18.4146	18.05	1.19751	0.8	1.69349	0.8	14586	347.286	389.5	0.00962978
R=757	unclass	unclass	unclass/unclass	R=757#unclass/unclass	879	137	6	117	8.97629	9.7	5.64591	3.2	4.85772	4.2	54285	396.241	313	0.0358393	27	1.78e-05
R=758	unclass	unclass	unclass/unclass	R=758#unclass/unclass	67	20	15	20	9.00432	9.05	1.23614	0	0.488803	0	1295	64.75	67	0.000854968
R=76.chkTE	DNA	DNA	DNA/DNA	R=76.chkTE#DNA/DNA	285	2310	26	2128	15.0262	15	3.69843	4.3	5.49908	3.5	428532	185.512	204	0.28292	12	7.92e-06
R=766	unclass	unclass	unclass/unclass	R=766#unclass/unclass	82	39	6	39	19.2788	19.5	0.832483	0	1.13911	0	3017	77.359	79	0.00199184
R=77	DNA	DNA	DNA/DNA	R=77#DNA/DNA	272	1	0	1	12.6	12.6	3.9	3.9	4.7	4.7	49	49	49	3.24e-05
R=770	unclass	unclass	unclass/unclass	R=770#unclass/unclass	178	449	5	446	16.8235	17.2	3.28429	5.8	7.45227	2.7	70251	156.461	170	0.0463802
R=777	DNA	TcMar	DNA/TcMar	R=777#DNA/TcMar	530	41	9	41	8.6519	7.3	1.28262	0.9	1.4224	0.7	14718	358.976	408	0.00971693
R=779.chkTE	unclass	unclass	unclass/unclass	R=779.chkTE#unclass/unclass	77	20	4	20	8.18598	9.35	3.21834	0	1.22176	2.5	1641	82.05	67	0.0010834
R=783	unclass	unclass	unclass/unclass	R=783#unclass/unclass	209	13	0	13	14.9093	16.1	4.79815	0.9	2.1963	4.2	1837	141.308	144	0.0012128
R=785	unclass	unclass	unclass/unclass	R=785#unclass/unclass	333	38	6	36	15.2601	15.5	3.81059	0.85	2.0203	1.85	9365	246.447	201	0.00618284
R=787.chkTE	unclass	unclass	unclass/unclass	R=787.chkTE#unclass/unclass	222	30	13	30	7.5951	7.25	2.8119	0	1.38751	0.5	5739	191.3	215	0.00378893
R=789	unclass	unclass	unclass/unclass	R=789#unclass/unclass	60	3	2	3	7.66213	8.3	0	0	0	0	169	56.3333	60	0.000111575
R=794	unclass	unclass	unclass/unclass	R=794#unclass/unclass	485	11	9	11	7.71673	5	1.31744	0.2	2.13749	0.4	4524	411.273	484	0.00298678
R=797.chkTE	unclass	unclass	unclass/unclass	R=797.chkTE#unclass/unclass	110	11	9	11	5.33967	5.7	0	0	0.591322	0	1210	110	110	0.000798851
R=8	unclass	unclass	unclass/unclass	R=8#unclass/unclass	547	325	0	293	17.7391	17.7	3.61324	5.6	6.38421	3	69418	213.594	212	0.0458303
R=801	unclass	unclass	unclass/unclass	R=801#unclass/unclass	310	8	2	8	20.1118	25.75	1.28284	2.3	1.86454	1.1	2174	271.75	272.5	0.00143529
R=808	unclass	unclass	unclass/unclass	R=808#unclass/unclass	102	18	3	18	11.2423	11	1.43299	0	1.47014	1	1534	85.2222	93	0.00101276
R=81	unclass	unclass	unclass/unclass	R=81#unclass/unclass	238	119	0	119	19.4585	19.3	3.85991	2.2	3.89025	2.4	18746	157.529	181	0.0123762
R=814.chkTE	unclass	unclass	unclass/unclass	R=814.chkTE#unclass/unclass	121	23	12	23	5.80764	5.9	0.59299	0	1.65442	0	2525	109.783	121	0.00166702
R=816.chkTE	unclass	unclass	unclass/unclass	R=816.chkTE#unclass/unclass	554	21	5	21	9.1046	8.9	3.15744	1.7	1.87763	1.6	7276	346.476	455	0.00480367
R=818	unclass	unclass	unclass/unclass	R=818#unclass/unclass	60	11	9	11	12.7515	13.8	0.166281	0	0.401544	0	777	70.6364	76	0.000512981
R=819	DNA	Merlin	DNA/Merlin	R=819#DNA/Merlin	179	30	1	30	24.2549	24.05	2.82994	2.25	2.55059	2.25	4068	135.6	136	0.00268572
R=820	unclass	unclass	unclass/unclass	R=820#unclass/unclass	66	3	0	3	8.04718	13.4	0	0	2.26479	0	142	47.3333	48	9.37e-05
R=827	unclass	unclass	unclass/unclass	R=827#unclass/unclass	283	29	6	29	13.3063	12.7	1.80209	0	1.13241	0.4	6736	232.276	264	0.00444716
R=829.chkTE	unclass	unclass	unclass/unclass	R=829.chkTE#unclass/unclass	370	128	4	128	10.8016	11.2	2.61477	1.4	3.5427	1.3	18880	147.5	90.5	0.0124647
R=831	DNA	Maverick-Tlr	DNA/Maverick-Tlr	R=831#DNA/Maverick-Tlr	559	27	6	25	13.9933	16.5	2.21061	1.1	1.86432	1.2	9353	346.407	243	0.00617492
R=832.chkTE	unclass	unclass	unclass/unclass	R=832.chkTE#unclass/unclass	390	166	4	155	8.64049	8.55	2.39883	1.5	2.62614	0.75	29860	179.88	148.5	0.0197138	2	1.32e-06
R=835.chkTE	unclass	unclass	unclass/unclass	R=835.chkTE#unclass/unclass	200	28	10	22	7.11473	8.45	1.62033	0.65	1.20215	0.85	4053	144.75	122	0.00267582
R=837	unclass	unclass	unclass/unclass	R=837#unclass/unclass	122	1	0	1	3.1	3.1	0	0	0	0	64	64	64	4.23e-05
R=84.chkTE	unclass	unclass	unclass/unclass	R=84.chkTE#unclass/unclass	316	58	0	58	16.1559	16	4.80855	2.9	2.79833	3.2	15981	275.534	299.5	0.0105508
R=842.chkTE	unclass	unclass	unclass/unclass	R=842.chkTE#unclass/unclass	384	24	4	24	11.1533	10.8	1.11618	1.1	1.39146	1.1	6156	256.5	227.5	0.00406424
R=843.chkTE	unclass	unclass	unclass/unclass	R=843.chkTE#unclass/unclass	64	6	3	6	1.87429	1.6	0	0	1.09636	0	385	64.1667	64	0.00025418
R=849	unclass	unclass	unclass/unclass	R=849#unclass/unclass	276	5	0	5	1.32955	0	0.193182	0	0	0	528	105.6	112	0.000348589
R=852	unclass	unclass	unclass/unclass	R=852#unclass/unclass	50	1	0	1	4.4	4.4	0	0	0	0	45	45	45	2.97e-05
R=854.chkTE	unclass	unclass	unclass/unclass	R=854.chkTE#unclass/unclass	129	26	2	25	14.0856	13.3	3.69455	2.7	3.29997	2.5	3082	118.538	121.5	0.00203476
R=855	unclass	unclass	unclass/unclass	R=855#unclass/unclass	99	21	8	21	5.45294	5.2	2.93668	0	0.169756	0	1802	85.8095	95	0.00118969
R=859	unclass	unclass	unclass/unclass	R=859#unclass/unclass	100	43	21	43	9.59363	9.3	2.70437	0	0.676444	0	3549	82.5349	97	0.00234308
R=865	unclass	unclass	unclass/unclass	R=865#unclass/unclass	229	3	0	3	8.39052	7.2	4.04062	0.5	1.63733	1.5	517	172.333	175	0.000341327
R=867.H	DNA	TcMar	DNA/TcMar	R=867.H#DNA/TcMar	800	66	7	60	21.7216	30.1	2.12669	2.5	2.26442	2.4	21827	330.712	236	0.0144103
R=869.chkTE	unclass	unclass	unclass/unclass	R=869.chkTE#unclass/unclass	99	28	11	27	5.29612	5.6	1.07703	0	0.95131	0	2138	76.3571	83	0.00141152	51	3.37e-05
R=87.chkTE	unclass	unclass	unclass/unclass	R=87.chkTE#unclass/unclass	166	112	1	111	9.72649	9.3	1.5916	0.8	2.97431	0.8	11435	102.098	98	0.00754947	15	9.9e-06
R=88	unclass	unclass	unclass/unclass	R=88#unclass/unclass	121	107	5	107	13.736	13.6	0.817726	1.1	2.29083	0	10758	100.542	94	0.00710251
R=882	DNA	TcMar	DNA/TcMar	R=882#DNA/TcMar	139	18	6	18	8.12005	8	1.3784	0	0.422648	0	2190	121.667	133.5	0.00144585
R=884.chkTE	unclass	unclass	unclass/unclass	R=884.chkTE#unclass/unclass	118	8	5	8	0	0	0	0	0	0	792	99	118	0.000522884
R=891	unclass	unclass	unclass/unclass	R=891#unclass/unclass	627	42	6	41	14.603	16.35	1.76078	0.3	0.67349	1	19521	464.786	412	0.0128879
R=896	unclass	unclass	unclass/unclass	R=896#unclass/unclass	257	55	6	55	9.06505	8.7	2.40299	1.9	2.59267	0.8	8375	152.273	149	0.00552923
R=898.chkTE	DNA	DNA	DNA/DNA	R=898.chkTE#DNA/DNA	85	195	49	195	6.95529	6.4	1.37196	0	1.5732	0	15450	79.2308	78	0.0102002
R=903.chkTE	unclass	unclass	unclass/unclass	R=903.chkTE#unclass/unclass	136	6	1	6	10.0132	10.35	4.32205	0.05	0.526325	0.9	585	97.5	95.5	0.000386221
R=908.chkTE	unclass	unclass	unclass/unclass	R=908.chkTE#unclass/unclass	70	51	20	51	7.19997	6.7	0.809206	0	1.15081	0	3324	65.1765	68	0.00219453
R=91	unclass	unclass	unclass/unclass	R=91#unclass/unclass	55	207	48	207	10.9355	10.9	1.17405	1.6	1.63636	0	11525	55.6763	54	0.00760889
R=911	unclass	unclass	unclass/unclass	R=911#unclass/unclass	168	12	4	12	14.0567	7.75	2.53913	0	1.01791	1.15	1692	141	158.5	0.00111707
R=918.check-RbtRNA-Pro-CCG	unclass	unclass	unclass/unclass	R=918.check-RbtRNA-Pro-CCG#unclass/unclass	64	2	0	2	6.45	6.45	0	1.6	3.2	1.6	128	64	64	8.45e-05
R=921	unclass	unclass	unclass/unclass	R=921#unclass/unclass	50	14	14	14	11.8848	13.05	0.139403	0	0.614509	0	703	50.2143	50	0.000464126
R=924.chkTE	unclass	unclass	unclass/unclass	R=924.chkTE#unclass/unclass	157	14	7	13	3.01238	2.35	0.0572402	0	0.811414	0	1761	125.786	156.5	0.00116263
R=927	unclass	unclass	unclass/unclass	R=927#unclass/unclass	214	11	6	11	4.7182	2.8	0.604503	0.6	1.21956	0	2132	193.818	213	0.00140756
R=928	unclass	unclass	unclass/unclass	R=928#unclass/unclass	103	24	14	24	20.1497	20.6	0.894318	1	1.08435	1	2147	89.4583	103	0.00141746
R=930	unclass	unclass	unclass/unclass	R=930#unclass/unclass	64	9	6	9	6.92014	6.3	0.356184	0	2.59399	0	566	62.8889	64	0.000373677
R=932.chkTE	unclass	unclass	unclass/unclass	R=932.chkTE#unclass/unclass	586	33	5	32	8.94026	6	2.62651	0.3	1.19023	1.7	8482	257.03	173	0.00559988
R=935.chkTE	DNA	Maverick	DNA/Maverick	R=935.chkTE#DNA/Maverick	152	9	0	9	10.1	9.9	1.25	1.6	1.86743	0.8	2048	227.556	280	0.0013521
R=938	unclass	unclass	unclass/unclass	R=938#unclass/unclass	102	15	6	15	2.29254	2	0.82322	0	0.0663442	0	1447	96.4667	101	0.00095532
R=940	unclass	unclass	unclass/unclass	R=940#unclass/unclass	321	7	3	7	4.59535	4.4	1.22075	0	0.102269	0	1807	258.143	308	0.00119299
R=943	unclass	unclass	unclass/unclass	R=943#unclass/unclass	55	21	8	21	14.2388	14.6	0	0	0	0	1124	53.5238	53	0.000742073
R=945.chkTE	DNA	Maverick	DNA/Maverick	R=945.chkTE#DNA/Maverick	457	13	0	12	13.6919	17.1	3.91924	2.8	4.43657	1.4	2718	209.077	180	0.00179444
R=946	unclass	unclass	unclass/unclass	R=946#unclass/unclass	150	6	4	6	0	0	0	0	0	0	817	136.167	150	0.000539389
R=947	unclass	unclass	unclass/unclass	R=947#unclass/unclass	65	14	13	14	3.32162	0	0.221175	0	0	0	902	64.4286	65	0.000595507
R=951	unclass	unclass	unclass/unclass	R=951#unclass/unclass	191	28	17	28	7.14513	6.1	2.17851	0	0.99043	0.55	5068	181	187.5	0.00334593
R=952	unclass	unclass	unclass/unclass	R=952#unclass/unclass	317	16	10	16	10.0097	9.65	0.32778	0	0.431054	0	4154	259.625	317	0.0027425
R=965	unclass	unclass	unclass/unclass	R=965#unclass/unclass	203	23	11	23	11.9033	9.2	1.74514	1.5	2.29343	0.5	4187	182.043	198	0.00276429
R=966.chkTE	DNA	Tlr	DNA/Tlr	R=966.chkTE#DNA/Tlr	456	53	5	52	20.4366	21.6	2.32549	2.2	2.26753	1.2	15647	295.226	293	0.0103303
R=971	unclass	unclass	unclass/unclass	R=971#unclass/unclass	285	22	5	22	13.8023	19.5	1.01453	0	1.30119	0	4020	182.727	225.5	0.00265403
R=976	unclass	unclass	unclass/unclass	R=976#unclass/unclass	98	29	14	29	10.5532	11.3	1.14335	0	1.51348	0	2708	93.3793	96	0.00178784
R=977	unclass	unclass	unclass/unclass	R=977#unclass/unclass	121	31	12	30	15.8459	12.5	0.616496	0	4.67897	0	3219	103.839	121	0.00212521
R=98	unclass	unclass	unclass/unclass	R=98#unclass/unclass	119	218	52	217	14.1927	13.8	2.86079	2.5	3.60085	1.05	22738	104.303	111	0.0150118
R=986	unclass	unclass	unclass/unclass	R=986#unclass/unclass	73	3	0	3	7.9973	7.3	0	0	0	0	222	74	68	0.000146566
R=987	unclass	unclass	unclass/unclass	R=987#unclass/unclass	86	49	22	49	4.21157	1.2	0.540094	0	0.20955	0	4063	82.9184	83	0.00268242
R=989	unclass	unclass	unclass/unclass	R=989#unclass/unclass	146	35	15	35	9.488	9	0.788047	0.7	2.12312	0.7	4568	130.514	145	0.00301583
R=99.chkTE	unclass	unclass	unclass/unclass	R=99.chkTE#unclass/unclass	253	120	1	120	12.1025	13.8	2.85887	2.4	2.82169	1.8	24551	204.592	167	0.0162087
R=990	unclass	unclass	unclass/unclass	R=990#unclass/unclass	91	25	10	24	9.92985	9.5	1.97985	2.2	4.66364	1.6	1826	73.04	82	0.00120554	4	2.64e-06
R=996	Viral	Baculovirus	Viral/Baculovirus	R=996#Viral/Baculovirus	na	39	5	39	13.6502	16.8	3.12639	0	0.702141	1.7	15224	390.359	356	0.010051	3	1.98e-06
R=997	unclass	unclass	unclass/unclass	R=997#unclass/unclass	133	6	4	6	2.44399	2.7	0.397954	0	0.137084	0.4	782	130.333	132	0.000516282
R=998	unclass	unclass	unclass/unclass	R=998#unclass/unclass	404	11	5	11	12.2162	11.9	1.3362	0.5	1.04342	1	3876	352.364	399	0.00255896
Tt.REP1part	nonLTR	nonLTR	nonLTR/nonLTR	Tt.REP1part#nonLTR/nonLTR	5383	339	0	302	13.9449	13.4	1.74796	1.3	1.49589	1.4	141009	415.956	134	0.0930951	19	1.25e-05
Tt.REP2	nonLTR	nonLTR	nonLTR/nonLTR	Tt.REP2#nonLTR/nonLTR	6282	297	0	281	14.5458	9.8	2.14512	1	1.54808	1.3	91300	307.407	141	0.0602769	22	1.45e-05
Tt.REP3part	nonLTR	nonLTR	nonLTR/nonLTR	Tt.REP3part#nonLTR/nonLTR	2119	102	0	92	14.2492	15.1	1.98081	2.5	2.04585	1.25	29447	288.696	152	0.0194411
Tt.REP6	nonLTR	nonLTR	nonLTR/nonLTR	Tt.REP6#nonLTR/nonLTR	6107	178	0	162	12.0513	12.05	2.0613	0.6	1.25044	1	106858	600.326	389	0.0705484	14	9.24e-06
Tt.TIE1	DNA	Tlr	DNA/Tlr	Tt.TIE1#DNA/Tlr	1203	46	0	46	13.1987	14.45	1.77713	1	1.1517	1.75	27435	596.413	454	0.0181128
Tt.TIE2	DNA	Tlr	DNA/Tlr	Tt.TIE2#DNA/Tlr	622	8	0	8	24.7883	26.2	3.74827	4.45	3.97507	3.9	2952	369	393.5	0.00194893
Tt.TIE3	DNA	Tlr	DNA/Tlr	Tt.TIE3#DNA/Tlr	618	58	0	55	21.9825	22.7	2.54572	1.55	2.19194	2	26175	451.293	571	0.0172809
Tt.Tlr1.3pr.integrase	DNA	Tlr	DNA/Tlr	Tt.Tlr1.3pr.integrase#DNA/Tlr	3677	1192	0	1105	15.8659	13.8	2.68283	1	1.57543	1.9	503620	422.5	251	0.332493	489	0.000322841
Tt.Tlr5pr.helicase	DNA	Tlr	DNA/Tlr	Tt.Tlr5pr.helicase#DNA/Tlr	5342	770	3	725	11.1986	10	1.80289	0.1	0.962736	1.45	321129	417.051	125.5	0.212012	167	0.000110255
