# Supplementary material for: Structure of the germline genome of Tetrahymena thermophila and relationship to the massively rearranged somatic genome
Source: eLife. 2016 Nov 28;5:e19090. doi: 10.7554/eLife.19090 (PMC5182062; doi:10.7554/eLife.19090)
Supplement: Supplementary file 3. — (A) 7551 High Confidence IESs. (B) Summary of the putative TE content in IESs. (C) Interspersed repeat (putative TEs) content. (D) Characteristics of IESs within protein-coding regions. DOI: http://dx.doi.org/10.7554/eLife.19090.027 [file elife-19090-supp3.xlsx]

## Sheet: Supplementary File 3A
Supplementary File 3A. 7551 High Confidence IESs
mic supercont	mic beg*	mic end*	IES ID	IES size*
supercont2.1	25533	39239	IES-00001-r14	13707
supercont2.1	40362	41276	IES-00002-r15	915
supercont2.1	44717	49461	IES-00003-r17	4745
supercont2.1	111380	112439	IES-00004-r13	1060
supercont2.1	121285	122598	IES-00005-r6	1314
supercont2.1	170217	172078	IES-00006-r16	1862
supercont2.1	182376	184622	IES-00007-r16	2247
supercont2.1	199110	202324	IES-00008-r18	3215
supercont2.1	266672	268684	IES-00009-r7	2013
supercont2.1	303613	305758	IES-00010-r19	2146
supercont2.1	316111	317084	IES-00011-r15	974
supercont2.1	359094	360638	IES-00012-r11	1545
supercont2.1	364598	365358	IES-00013-r15	761
supercont2.1	390209	391566	IES-00014-r14	1358
supercont2.1	394666	397551	IES-00015-r12	2886
supercont2.1	418899	420246	IES-00016-r10	1348
supercont2.1	427139	428083	IES-00017-r16	945
supercont2.1	433920	435251	IES-00018-r12	1332
supercont2.1	442790	444529	IES-00019-r13	1740
supercont2.1	467382	469309	IES-00020-r18	1928
supercont2.1	474644	474956	IES-00021-r19	313
supercont2.1	476358	479514	IES-00022-r15	3157
supercont2.1	483383	484513	IES-00023-r12	1131
supercont2.1	530758	532388	IES-00024-r16	1631
supercont2.1	561257	564069	IES-00025-r13	2813
supercont2.1	573534	574836	IES-00026-r17	1303
supercont2.1	618011	619515	IES-00027-r13	1505
supercont2.1	635838	637691	IES-00028-r15	1854
supercont2.1	682179	683947	IES-00029-r14	1769
supercont2.1	711981	712602	IES-00030-r10	622
supercont2.1	714929	716905	IES-00031-r20	1977
supercont2.1	753255	755591	IES-00032-r18	2337
supercont2.1	763226	763876	IES-00033-r17	651
supercont2.1	821776	822488	IES-00034-r7	713
supercont2.1	899749	901051	IES-00035-r10	1303
supercont2.1	967216	967587	IES-00036-r19	372
supercont2.1	1012150	1015673	IES-00037-r9	3524
supercont2.1	1018653	1025356	IES-00038-r16	6704
supercont2.1	1060770	1061562	IES-00039-r16	793
supercont2.1	1089540	1092337	IES-00040-r15	2798
supercont2.1	1094679	1096274	IES-00041-r18	1596
supercont2.1	1099442	1099785	IES-00042-r12	344
supercont2.1	1105737	1109547	IES-00043-r8	3811
supercont2.1	1126719	1128186	IES-00044-r12	1468
supercont2.1	1155721	1156869	IES-00045-r16	1149
supercont2.1	1161565	1162378	IES-00046-r14	814
supercont2.1	1178280	1178736	IES-00047-r14	457
supercont2.1	1200563	1200793	IES-00048-r12	231
supercont2.1	1224146	1224761	IES-00049-r12	616
supercont2.1	1260178	1262118	IES-00050-r7	1941
supercont2.1	1292002	1293720	IES-00051-r12	1719
supercont2.1	1296824	1298338	IES-00052-r14	1515
supercont2.1	1321057	1323168	IES-00053-r11	2112
supercont2.1	1329867	1331144	IES-00054-r15	1278
supercont2.1	1337385	1346926	IES-00055-r17	9542
supercont2.1	1351892	1352713	IES-00056-r16	822
supercont2.1	1370693	1372864	IES-00057-r12	2172
supercont2.1	1411163	1417882	IES-00058-r13	6720
supercont2.1	1429509	1429785	IES-00059-r21	277
supercont2.1	1447331	1447884	IES-00060-r15	554
supercont2.1	1470792	1473098	IES-00061-r20	2307
supercont2.1	1490236	1491148	IES-00062-r8	913
supercont2.1	1494772	1496240	IES-00063-r15	1469
supercont2.1	1504387	1506160	IES-00064-r15	1774
supercont2.1	1533391	1535439	IES-00065-r10	2049
supercont2.1	1597385	1600961	IES-00066-r15	3577
supercont2.1	1664474	1668527	IES-00067-r16	4054
supercont2.1	1706998	1710511	IES-00068-r12	3514
supercont2.1	1738036	1740624	IES-00069-r15	2589
supercont2.1	1765012	1765342	IES-00070-r7	331
supercont2.1	1768032	1770424	IES-00071-r17	2393
supercont2.1	1817660	1819691	IES-00072-r14	2032
supercont2.1	1852550	1853064	IES-00073-r19	515
supercont2.1	1860311	1862754	IES-00074-r10	2444
supercont2.1	1875799	1877208	IES-00075-r18	1410
supercont2.1	1893488	1894756	IES-00076-r7	1269
supercont2.1	1913897	1914600	IES-00077-r16	704
supercont2.1	1919025	1920534	IES-00078-r21	1510
supercont2.1	1936435	1938003	IES-00079-r19	1569
supercont2.1	1954935	1957699	IES-00080-r8	2765
supercont2.1	1988405	1990684	IES-00081-r11	2280
supercont2.1	2022881	2025167	IES-00082-r14	2287
supercont2.1	2027233	2029387	IES-00083-r14	2155
supercont2.1	2035824	2039134	IES-00084-r11	3311
supercont2.1	2041209	2044892	IES-00085-r11	3684
supercont2.1	2046593	2049158	IES-00086-r12	2566
supercont2.1	2052609	2057091	IES-00087-r12	4483
supercont2.1	2060779	2062534	IES-00088-r4	1756
supercont2.1	2069631	2071702	IES-00089-r21	2072
supercont2.1	2092172	2093589	IES-00090-r10	1418
supercont2.1	2095733	2096908	IES-00091-r13	1176
supercont2.1	2103352	2104982	IES-00092-r12	1631
supercont2.1	2145022	2146643	IES-00093-r18	1622
supercont2.1	2152992	2156502	IES-00094-r9	3511
supercont2.1	2212005	2215846	IES-00095-r9	3842
supercont2.1	2224656	2231880	IES-00096-r12	7225
supercont2.1	2241838	2243628	IES-00097-r16	1791
supercont2.1	2286832	2289791	IES-00098-r8	2960
supercont2.1	2358363	2359865	IES-00099-r16	1503
supercont2.1	2361476	2362609	IES-00100-r22	1134
supercont2.1	2367900	2368978	IES-00101-r15	1079
supercont2.1	2373962	2377804	IES-00102-r15	3843
supercont2.1	2379227	2384123	IES-00103-r16	4897
supercont2.1	2385088	2387258	IES-00104-r8	2171
supercont2.1	2396884	2399493	IES-00105-r15	2610
supercont2.1	2402495	2403728	IES-00106-r10	1234
supercont2.1	2406239	2408754	IES-00107-r14	2516
supercont2.1	2415218	2418131	IES-00108-r9	2914
supercont2.1	2433176	2434431	IES-00109-r22	1256
supercont2.1	2466273	2467944	IES-00110-r16	1672
supercont2.1	2479502	2480169	IES-00111-r13	668
supercont2.1	2483845	2486439	IES-00112-r11	2595
supercont2.1	2496496	2497718	IES-00113-r12	1223
supercont2.1	2514760	2517617	IES-00114-r15	2858
supercont2.1	2535040	2535701	IES-00115-r9	662
supercont2.1	2542686	2544468	IES-00116-r11	1783
supercont2.1	2588655	2589594	IES-00117-r21	940
supercont2.1	2606320	2609095	IES-00118-r16	2776
supercont2.1	2612776	2616334	IES-00119-r24	3559
supercont2.1	2645552	2649441	IES-00120-r14	3890
supercont2.1	2651295	2652920	IES-00121-r26	1626
supercont2.1	2710739	2717618	IES-00122-r24	6880
supercont2.1	2726788	2727419	IES-00123-r7	632
supercont2.1	2735366	2737499	IES-00124-r13	2134
supercont2.1	2756773	2759755	IES-00125-r11	2983
supercont2.1	2775886	2777918	IES-00126-r17	2033
supercont2.1	2816550	2817399	IES-00127-r16	850
supercont2.1	2842923	2849826	IES-00128-r13	6904
supercont2.1	2850984	2852308	IES-00129-r16	1325
supercont2.1	2864773	2865985	IES-00130-r12	1213
supercont2.1	2903745	2905963	IES-00131-r12	2219
supercont2.1	2907060	2909867	IES-00132-r11	2808
supercont2.1	2965727	2970200	IES-00133-r16	4474
supercont2.1	3030545	3032774	IES-00134-r13	2230
supercont2.1	3061739	3063904	IES-00135-r16	2166
supercont2.1	3100972	3102487	IES-00136-r14	1516
supercont2.1	3122601	3123925	IES-00137-r16	1325
supercont2.1	3126053	3127690	IES-00138-r12	1638
supercont2.1	3148178	3149129	IES-00139-r14	952
supercont2.1	3200157	3201035	IES-00140-r11	879
supercont2.1	3216261	3216710	IES-00141-r14	450
supercont2.1	3221193	3221833	IES-00142-r13	641
supercont2.1	3226328	3228970	IES-00143-r12	2643
supercont2.1	3269193	3269918	IES-00145-r14	726
supercont2.1	3298561	3301234	IES-00146-r20	2674
supercont2.1	3311270	3314049	IES-00147-r7	2780
supercont2.1	3333330	3336179	IES-00148-r16	2850
supercont2.1	3368899	3369143	IES-00149-r12	245
supercont2.1	3395803	3396450	IES-00150-r9	648
supercont2.1	3416483	3418782	IES-00151-r9	2300
supercont2.1	3430266	3439342	IES-00152-r10	9077
supercont2.1	3449063	3452349	IES-00153-r6	3287
supercont2.1	3454503	3456960	IES-00154-r10	2458
supercont2.1	3471060	3474908	IES-00155-r17	3849
supercont2.1	3506321	3506570	IES-00156-r26	250
supercont2.1	3515156	3515595	IES-00157-r12	440
supercont2.1	3524336	3527531	IES-00158-r11	3196
supercont2.10	30536	33144	IES-00159-r11	2609
supercont2.10	34931	39364	IES-00160-r16	4434
supercont2.10	40765	45246	IES-00161-r17	4482
supercont2.10	50837	52787	IES-00162-r4	1951
supercont2.10	60005	61824	IES-00163-r9	1820
supercont2.10	112020	117945	IES-00164-r12	5926
supercont2.10	124473	126767	IES-00165-r14	2295
supercont2.10	135206	138749	IES-00166-r13	3544
supercont2.10	144235	144671	IES-00167-r19	437
supercont2.10	205797	206090	IES-00168-r19	294
supercont2.10	226699	229501	IES-00169-r13	2803
supercont2.10	240135	242054	IES-00170-r14	1920
supercont2.10	315407	318535	IES-00171-r11	3129
supercont2.10	327342	328751	IES-00172-r19	1410
supercont2.10	340936	342354	IES-00173-r9	1419
supercont2.10	347170	348234	IES-00174-r14	1065
supercont2.10	357193	359928	IES-00175-r12	2736
supercont2.10	366900	368615	IES-00176-r5	1716
supercont2.10	376309	377664	IES-00177-r13	1356
supercont2.10	392573	397784	IES-00178-r9	5212
supercont2.10	401161	402198	IES-00179-r11	1038
supercont2.10	413827	416276	IES-00180-r13	2450
supercont2.10	432198	434362	IES-00181-r13	2165
supercont2.10	438741	442707	IES-00182-r8	3967
supercont2.10	449196	451595	IES-00183-r10	2400
supercont2.10	459975	461646	IES-00184-r7	1672
supercont2.10	462819	465402	IES-00185-r11	2584
supercont2.10	470546	472216	IES-00186-r12	1671
supercont2.10	486233	490027	IES-00187-r14	3795
supercont2.10	495883	500022	IES-00188-r14	4140
supercont2.10	524926	527708	IES-00189-r16	2783
supercont2.10	542927	544884	IES-00190-r12	1958
supercont2.10	598051	603906	IES-00191-r12	5856
supercont2.10	653213	662041	IES-00192-r13	8829
supercont2.10	675562	677369	IES-00193-r14	1808
supercont2.10	748177	751109	IES-00194-r13	2933
supercont2.10	775497	776036	IES-00195-r15	540
supercont2.10	811438	811770	IES-00196-r13	333
supercont2.10	817576	821295	IES-00197-r23	3720
supercont2.10	823727	827318	IES-00198-r12	3592
supercont2.10	832045	836276	IES-00199-r19	4232
supercont2.10	863881	865657	IES-00200-r13	1777
supercont2.10	871713	875181	IES-00201-r10	3469
supercont2.10	907759	911571	IES-00202-r15	3813
supercont2.10	945157	950316	IES-00203-r14	5160
supercont2.10	956987	957479	IES-00204-r13	493
supercont2.10	963118	964793	IES-00205-r16	1676
supercont2.10	980882	983998	IES-00206-r7	3117
supercont2.10	1005842	1008164	IES-00207-r7	2323
supercont2.10	1009303	1011909	IES-00208-r11	2607
supercont2.10	1011990	1014405	IES-00209-r15	2416
supercont2.10	1017420	1018370	IES-00210-r10	951
supercont2.10	1040500	1040912	IES-00211-r17	413
supercont2.10	1049491	1057779	IES-00212-r7	8289
supercont2.10	1066935	1070669	IES-00213-r8	3735
supercont2.10	1072303	1075929	IES-00214-r6	3627
supercont2.10	1082572	1083444	IES-00215-r15	873
supercont2.10	1092953	1094043	IES-00216-r16	1091
supercont2.10	1108554	1110638	IES-00217-r11	2085
supercont2.10	1113323	1114181	IES-00218-r18	859
supercont2.10	1124454	1125100	IES-00219-r14	647
supercont2.10	1141949	1144003	IES-00220-r10	2055
supercont2.10	1154723	1156283	IES-00221-r18	1561
supercont2.10	1162994	1164916	IES-00222-r9	1923
supercont2.10	1179224	1179880	IES-00223-r10	657
supercont2.10	1184217	1186177	IES-00224-r14	1961
supercont2.10	1215867	1218049	IES-00225-r14	2183
supercont2.10	1272281	1273517	IES-00226-r12	1237
supercont2.10	1282013	1283795	IES-00227-r20	1783
supercont2.10	1290820	1291764	IES-00228-r14	945
supercont2.10	1334807	1341671	IES-00229-r19	6865
supercont2.10	1365995	1369050	IES-00230-r14	3056
supercont2.10	1425773	1427237	IES-00231-r8	1465
supercont2.10	1435947	1440405	IES-00232-r16	4459
supercont2.10	1471745	1477245	IES-00233-r18	5501
supercont2.10	1483381	1483894	IES-00234-r17	514
supercont2.10	1526648	1528379	IES-00235-r10	1732
supercont2.10	1544770	1546704	IES-00236-r6	1935
supercont2.10	1587629	1590271	IES-00237-r12	2643
supercont2.10	1699340	1701630	IES-00238-r12	2291
supercont2.10	1711603	1712209	IES-00239-r16	607
supercont2.10	1728581	1730145	IES-00240-r13	1565
supercont2.10	1763220	1768596	IES-00241-r8	5377
supercont2.10	1796873	1797740	IES-00242-r13	868
supercont2.10	1801878	1802478	IES-00243-r9	601
supercont2.10	1827195	1828040	IES-00244-r9	846
supercont2.10	1835363	1838857	IES-00245-r18	3495
supercont2.10	1855205	1855911	IES-00246-r15	707
supercont2.10	1861136	1862201	IES-00247-r12	1066
supercont2.10	1891416	1894526	IES-00248-r26	3111
supercont2.10	1899136	1906162	IES-00249-r14	7027
supercont2.10	1943037	1946883	IES-00250-r16	3847
supercont2.10	1969857	1970651	IES-00251-r15	795
supercont2.10	1994480	1996024	IES-00252-r11	1545
supercont2.10	2029392	2033110	IES-00253-r10	3719
supercont2.10	2039042	2040273	IES-00254-r14	1232
supercont2.10	2064127	2065770	IES-00255-r13	1644
supercont2.10	2071493	2074817	IES-00256-r15	3325
supercont2.10	2077209	2081744	IES-00257-r17	4536
supercont2.100	4322	7452	IES-00258-r5	3131
supercont2.100	11915	17342	IES-00259-r14	5428
supercont2.100	21977	26273	IES-00260-r12	4297
supercont2.100	29529	38893	IES-00261-r11	9365
supercont2.100	40104	42938	IES-00262-r9	2835
supercont2.100	45915	55518	IES-00263-r9	9604
supercont2.100	59071	61670	IES-00264-r10	2600
supercont2.100	63735	70374	IES-00265-r12	6640
supercont2.100	98204	101341	IES-00266-r12	3138
supercont2.100	103096	106618	IES-00267-r3	3523
supercont2.100	108887	119441	IES-00268-r11	10555
supercont2.100	122667	124458	IES-00269-r13	1792
supercont2.100	126918	132699	IES-00270-r17	5782
supercont2.100	138744	144232	IES-00271-r32	5489
supercont2.100	148640	151186	IES-00272-r13	2547
supercont2.100	172941	176574	IES-00273-r12	3634
supercont2.100	218930	220500	IES-00274-r12	1571
supercont2.100	230567	232556	IES-00275-r20	1990
supercont2.100	235997	239039	IES-00276-r23	3043
supercont2.100	241208	243394	IES-00277-r16	2187
supercont2.100	247110	248852	IES-00278-r16	1743
supercont2.100	261693	264983	IES-00279-r15	3291
supercont2.100	272112	278894	IES-00280-r14	6783
supercont2.100	282528	283282	IES-00281-r16	755
supercont2.100	285137	292285	IES-00282-r12	7149
supercont2.100	311443	316565	IES-00283-r23	5123
supercont2.100	326159	330055	IES-00284-r11	3897
supercont2.100	332026	341099	IES-00285-r10	9074
supercont2.100	384280	386217	IES-00286-r11	1938
supercont2.101	15262	22258	IES-00287-r12	6997
supercont2.101	42392	44765	IES-00288-r19	2374
supercont2.101	71701	73135	IES-00289-r11	1435
supercont2.101	126624	129841	IES-00290-r12	3218
supercont2.101	151839	156031	IES-00291-r14	4193
supercont2.101	177491	189506	IES-00292-r12	12016
supercont2.101	191825	195441	IES-00293-r10	3617
supercont2.101	208816	210608	IES-00294-r9	1793
supercont2.101	216936	219138	IES-00295-r16	2203
supercont2.101	243597	244357	IES-00296-r7	761
supercont2.101	258437	260222	IES-00297-r14	1786
supercont2.101	262905	264089	IES-00298-r18	1185
supercont2.101	271412	272578	IES-00299-r16	1167
supercont2.101	292862	294118	IES-00300-r10	1257
supercont2.101	320847	322983	IES-00301-r20	2137
supercont2.101	337731	339367	IES-00302-r19	1637
supercont2.101	345506	347188	IES-00303-r15	1683
supercont2.101	359063	363949	IES-00304-r15	4887
supercont2.102	20293	21083	IES-00305-r10	791
supercont2.102	39941	43032	IES-00306-r10	3092
supercont2.102	47276	52373	IES-00307-r15	5098
supercont2.102	57480	61936	IES-00308-r15	4457
supercont2.102	108923	110291	IES-00309-r16	1369
supercont2.102	165158	166492	IES-00310-r17	1335
supercont2.102	180166	183145	IES-00311-r18	2980
supercont2.102	220644	221865	IES-00312-r11	1222
supercont2.102	231231	232489	IES-00313-r16	1259
supercont2.102	235164	236618	IES-00314-r16	1455
supercont2.102	256180	259873	IES-00315-r14	3694
supercont2.102	274509	277710	IES-00316-r11	3202
supercont2.102	291530	294589	IES-00317-r15	3060
supercont2.102	317078	318452	IES-00318-r20	1375
supercont2.102	328796	332575	IES-00319-r23	3780
supercont2.103	10772	16375	IES-00320-r14	5604
supercont2.103	19887	24413	IES-00321-r12	4527
supercont2.103	56663	73661	IES-00323-r17	16999
supercont2.103	79237	80867	IES-00324-r14	1631
supercont2.103	84835	88361	IES-00325-r14	3527
supercont2.103	95037	97235	IES-00326-r16	2199
supercont2.103	101031	105877	IES-00327-r14	4847
supercont2.103	144950	147466	IES-00329-r8	2517
supercont2.103	153297	163553	IES-00330-r8	10257
supercont2.103	164777	166258	IES-00331-r9	1482
supercont2.103	169915	171540	IES-00332-r13	1626
supercont2.103	177372	181792	IES-00333-r14	4421
supercont2.103	186231	186508	IES-00334-r15	278
supercont2.103	188632	196448	IES-00335-r15	7817
supercont2.103	204132	205249	IES-00336-r26	1118
supercont2.103	213054	215926	IES-00337-r10	2873
supercont2.103	222555	223716	IES-00338-r13	1162
supercont2.103	239441	240403	IES-00339-r16	963
supercont2.103	244938	246440	IES-00340-r18	1503
supercont2.103	249439	252744	IES-00341-r18	3306
supercont2.103	261339	262933	IES-00342-r6	1595
supercont2.103	270712	274658	IES-00343-r10	3947
supercont2.103	334667	336661	IES-00344-r6	1995
supercont2.103	363637	372635	IES-00345-r13	8999
supercont2.104	15202	20409	IES-00346-r12	5208
supercont2.104	28645	32205	IES-00347-r12	3561
supercont2.104	37864	43315	IES-00348-r14	5452
supercont2.104	54804	56930	IES-00349-r14	2127
supercont2.104	59798	61520	IES-00350-r18	1723
supercont2.104	69344	71422	IES-00351-r12	2079
supercont2.104	72959	74400	IES-00352-r9	1442
supercont2.104	77593	80831	IES-00353-r21	3239
supercont2.104	82710	89253	IES-00354-r14	6544
supercont2.104	119414	127204	IES-00355-r9	7791
supercont2.104	143185	149011	IES-00356-r14	5827
supercont2.104	150649	151203	IES-00357-r14	555
supercont2.104	154489	159016	IES-00358-r21	4528
supercont2.104	172661	173803	IES-00359-r17	1143
supercont2.104	193510	195148	IES-00360-r14	1639
supercont2.104	202050	207825	IES-00361-r15	5776
supercont2.104	243755	247149	IES-00362-r14	3395
supercont2.104	253105	254591	IES-00363-r10	1487
supercont2.104	274145	279691	IES-00364-r14	5547
supercont2.104	300107	306731	IES-00365-r13	6625
supercont2.104	310752	313978	IES-00366-r25	3227
supercont2.104	319101	325788	IES-00367-r14	6688
supercont2.104	326706	330959	IES-00368-r16	4254
supercont2.104	340676	356102	IES-00369-r12	15427
supercont2.104	369444	377614	IES-00370-r5	8171
supercont2.104	380170	382677	IES-00371-r9	2508
supercont2.105	27301	33329	IES-00372-r13	6029
supercont2.105	51316	53407	IES-00373-r14	2092
supercont2.105	60551	64178	IES-00374-r10	3628
supercont2.105	178353	178536	IES-00375-r21	184
supercont2.105	192639	193610	IES-00376-r6	972
supercont2.105	200706	201477	IES-00377-r8	772
supercont2.105	223317	224073	IES-00378-r6	757
supercont2.105	230640	234040	IES-00379-r5	3401
supercont2.105	240231	243912	IES-00380-r9	3682
supercont2.105	268598	273730	IES-00381-r12	5133
supercont2.105	280795	281668	IES-00382-r4	874
supercont2.105	292368	304680	IES-00383-r5	12313
supercont2.105	308335	312598	IES-00384-r7	4264
supercont2.105	317565	322153	IES-00385-r5	4589
supercont2.105	346758	348706	IES-00386-r10	1949
supercont2.106	18632	20011	IES-00388-r14	1380
supercont2.106	24057	25578	IES-00389-r9	1522
supercont2.106	26449	29835	IES-00390-r10	3387
supercont2.106	51856	53655	IES-00392-r8	1800
supercont2.106	65343	74737	IES-00393-r7	9395
supercont2.106	92200	98405	IES-00394-r10	6206
supercont2.106	100437	102535	IES-00395-r4	2099
supercont2.106	112245	114775	IES-00396-r12	2531
supercont2.106	118513	131581	IES-00397-r9	13069
supercont2.106	135555	148748	IES-00398-r16	13194
supercont2.106	164191	167599	IES-00399-r19	3409
supercont2.106	196338	203056	IES-00400-r17	6719
supercont2.106	204685	205474	IES-00401-r12	790
supercont2.106	208706	209637	IES-00402-r12	932
supercont2.106	217448	219466	IES-00403-r12	2019
supercont2.106	221700	223452	IES-00404-r15	1753
supercont2.106	226937	227439	IES-00405-r17	503
supercont2.106	248825	250671	IES-00406-r9	1847
supercont2.106	257801	262364	IES-00407-r19	4564
supercont2.106	291030	293686	IES-00408-r17	2657
supercont2.106	319026	320658	IES-00409-r19	1633
supercont2.106	327688	329775	IES-00410-r21	2088
supercont2.106	353409	354800	IES-00411-r19	1392
supercont2.107	30205	37165	IES-00414-r13	6961
supercont2.107	39626	42527	IES-00415-r15	2902
supercont2.107	72290	76335	IES-00416-r5	4046
supercont2.107	84530	86368	IES-00417-r15	1839
supercont2.107	115744	117721	IES-00418-r14	1978
supercont2.107	155223	155838	IES-00419-r13	616
supercont2.107	158977	160769	IES-00420-r8	1793
supercont2.107	180295	184090	IES-00421-r17	3796
supercont2.107	210260	212218	IES-00422-r17	1959
supercont2.107	245801	247825	IES-00423-r5	2025
supercont2.107	281119	285688	IES-00424-r11	4570
supercont2.107	290096	292933	IES-00425-r13	2838
supercont2.107	313211	314388	IES-00426-r9	1178
supercont2.107	327333	333319	IES-00427-r14	5987
supercont2.107	339562	341330	IES-00428-r9	1769
supercont2.107	346744	349747	IES-00429-r13	3004
supercont2.107	358552	362307	IES-00430-r11	3756
supercont2.107	364546	367256	IES-00431-r12	2711
supercont2.108	15110	18046	IES-00432-r14	2937
supercont2.108	23845	28780	IES-00433-r19	4936
supercont2.108	60925	68278	IES-00434-r9	7354
supercont2.108	70344	73651	IES-00435-r9	3308
supercont2.108	76697	78637	IES-00436-r11	1941
supercont2.108	83655	85044	IES-00437-r19	1390
supercont2.108	104971	108158	IES-00438-r10	3188
supercont2.108	165237	166738	IES-00439-r6	1502
supercont2.108	172950	179837	IES-00440-r15	6888
supercont2.108	220126	224287	IES-00441-r14	4162
supercont2.108	277108	279134	IES-00442-r11	2027
supercont2.108	301997	304384	IES-00443-r17	2388
supercont2.108	322406	324359	IES-00444-r12	1954
supercont2.108	326175	330252	IES-00445-r9	4078
supercont2.108	332286	333412	IES-00446-r13	1127
supercont2.109	10853	13060	IES-00447-r9	2208
supercont2.109	82435	84844	IES-00448-r9	2410
supercont2.109	101921	111704	IES-00449-r11	9784
supercont2.109	188353	190934	IES-00450-r11	2582
supercont2.109	198583	202461	IES-00451-r20	3879
supercont2.109	210246	212763	IES-00452-r14	2518
supercont2.109	219580	224812	IES-00453-r9	5233
supercont2.109	228821	231107	IES-00454-r11	2287
supercont2.109	236154	237009	IES-00455-r7	856
supercont2.109	238184	238739	IES-00456-r13	556
supercont2.109	251810	254152	IES-00457-r18	2343
supercont2.109	256829	258022	IES-00458-r21	1194
supercont2.109	259444	264048	IES-00459-r22	4605
supercont2.109	280371	281292	IES-00460-r17	922
supercont2.109	289996	292079	IES-00461-r17	2084
supercont2.109	299723	301684	IES-00462-r19	1962
supercont2.109	327354	329630	IES-00463-r17	2277
supercont2.109	344278	346508	IES-00464-r12	2231
supercont2.11	36865	37916	IES-00465-r6	1052
supercont2.11	46789	48782	IES-00466-r8	1994
supercont2.11	130010	130695	IES-00467-r14	686
supercont2.11	146893	148800	IES-00468-r10	1908
supercont2.11	154846	157027	IES-00469-r11	2182
supercont2.11	201564	203077	IES-00470-r14	1514
supercont2.11	208226	213501	IES-00471-r14	5276
supercont2.11	258248	260430	IES-00472-r11	2183
supercont2.11	271978	272730	IES-00473-r9	753
supercont2.11	275651	276225	IES-00474-r13	575
supercont2.11	406479	408176	IES-00475-r6	1698
supercont2.11	415198	416933	IES-00476-r21	1736
supercont2.11	440226	442426	IES-00477-r7	2201
supercont2.11	538272	539422	IES-00478-r21	1151
supercont2.11	571025	573592	IES-00479-r11	2568
supercont2.11	585121	585955	IES-00480-r18	835
supercont2.11	620259	623086	IES-00481-r15	2828
supercont2.11	713322	714254	IES-00482-r16	933
supercont2.11	738023	739560	IES-00483-r21	1538
supercont2.11	744863	750165	IES-00484-r16	5303
supercont2.11	807731	810371	IES-00485-r12	2641
supercont2.11	813403	817281	IES-00486-r17	3879
supercont2.11	883623	885020	IES-00487-r11	1398
supercont2.11	910113	911869	IES-00488-r19	1757
supercont2.11	912709	914111	IES-00489-r21	1403
supercont2.11	1004947	1006255	IES-00490-r17	1309
supercont2.11	1019581	1022308	IES-00491-r23	2728
supercont2.11	1174446	1177963	IES-00492-r11	3518
supercont2.11	1230385	1232875	IES-00493-r21	2491
supercont2.11	1237896	1239092	IES-00494-r9	1197
supercont2.11	1255577	1256970	IES-00495-r16	1394
supercont2.11	1374149	1376120	IES-00497-r13	1972
supercont2.11	1395212	1396245	IES-00498-r13	1034
supercont2.11	1398641	1399527	IES-00499-r16	887
supercont2.11	1442723	1444626	IES-00500-r20	1904
supercont2.11	1458052	1458799	IES-00501-r14	748
supercont2.11	1513081	1515742	IES-00502-r16	2662
supercont2.11	1583456	1585677	IES-00503-r13	2222
supercont2.11	1591098	1592186	IES-00504-r5	1089
supercont2.11	1596066	1598985	IES-00505-r11	2920
supercont2.11	1704449	1707045	IES-00506-r24	2597
supercont2.11	1733402	1741348	IES-00507-r8	7947
supercont2.11	1835377	1836968	IES-00508-r14	1592
supercont2.11	1916301	1917481	IES-00509-r17	1181
supercont2.11	1923748	1926031	IES-00510-r16	2284
supercont2.110	11294	18989	IES-00511-r16	7696
supercont2.110	20475	23879	IES-00512-r8	3405
supercont2.110	25899	29396	IES-00513-r10	3498
supercont2.110	31528	35613	IES-00514-r11	4086
supercont2.110	37402	40995	IES-00515-r12	3594
supercont2.110	45713	46931	IES-00516-r7	1219
supercont2.110	50944	55013	IES-00517-r6	4070
supercont2.110	56860	57212	IES-00518-r11	353
supercont2.110	61342	68703	IES-00519-r7	7362
supercont2.110	71064	75212	IES-00520-r9	4149
supercont2.110	96546	98169	IES-00521-r15	1624
supercont2.110	109691	110221	IES-00522-r22	531
supercont2.110	112689	121906	IES-00523-r10	9218
supercont2.110	127312	131215	IES-00524-r17	3904
supercont2.110	132886	134546	IES-00525-r10	1661
supercont2.110	145876	149813	IES-00526-r13	3938
supercont2.110	160584	161437	IES-00527-r14	854
supercont2.110	173839	178910	IES-00528-r11	5072
supercont2.110	190968	197012	IES-00529-r11	6045
supercont2.110	208222	209394	IES-00530-r14	1173
supercont2.110	224259	226004	IES-00531-r21	1746
supercont2.110	268810	271237	IES-00532-r9	2428
supercont2.110	322519	325758	IES-00533-r8	3240
supercont2.111	74088	78114	IES-00534-r9	4027
supercont2.111	81413	84645	IES-00535-r14	3233
supercont2.111	126716	128459	IES-00536-r7	1744
supercont2.111	179809	180701	IES-00537-r16	893
supercont2.111	259523	262500	IES-00538-r11	2978
supercont2.111	263472	266997	IES-00539-r9	3526
supercont2.111	273424	274895	IES-00540-r4	1472
supercont2.112	3691	15332	IES-00541-r12	11642
supercont2.112	17034	18670	IES-00542-r11	1637
supercont2.112	21910	29685	IES-00543-r12	7776
supercont2.112	56989	57563	IES-00544-r16	575
supercont2.112	59830	68567	IES-00545-r14	8738
supercont2.112	92082	95962	IES-00547-r4	3881
supercont2.112	100029	105416	IES-00548-r14	5388
supercont2.112	111497	113107	IES-00549-r11	1611
supercont2.112	129762	131108	IES-00550-r15	1347
supercont2.112	133944	137911	IES-00551-r20	3968
supercont2.112	162489	168610	IES-00552-r6	6122
supercont2.112	173492	189991	IES-00553-r8	16500
supercont2.112	199242	201755	IES-00554-r16	2514
supercont2.112	207108	210528	IES-00555-r7	3421
supercont2.112	222185	223307	IES-00557-r7	1123
supercont2.112	229993	239883	IES-00558-r9	9891
supercont2.112	257686	266817	IES-00559-r5	9132
supercont2.112	285706	294400	IES-00560-r11	8695
supercont2.112	301476	302905	IES-00561-r10	1430
supercont2.112	306503	310878	IES-00562-r14	4376
supercont2.112	315999	322579	IES-00563-r13	6581
supercont2.112	329439	331463	IES-00564-r12	2025
supercont2.112	336665	339602	IES-00565-r9	2938
supercont2.112	344853	350459	IES-00566-r7	5607
supercont2.113	29419	31674	IES-00567-r11	2256
supercont2.113	35326	41519	IES-00568-r22	6194
supercont2.113	45712	49319	IES-00569-r13	3608
supercont2.113	58998	61229	IES-00570-r12	2232
supercont2.113	81398	82699	IES-00571-r15	1302
supercont2.113	89106	91030	IES-00572-r21	1925
supercont2.113	126375	132156	IES-00573-r21	5782
supercont2.113	137465	137792	IES-00574-r16	328
supercont2.113	159787	162562	IES-00575-r12	2776
supercont2.113	188182	189786	IES-00576-r13	1605
supercont2.113	199350	204494	IES-00577-r10	5145
supercont2.113	207401	210098	IES-00578-r13	2698
supercont2.113	216072	217937	IES-00579-r16	1866
supercont2.113	235136	237454	IES-00580-r11	2319
supercont2.113	239537	241244	IES-00581-r16	1708
supercont2.113	257242	260042	IES-00582-r14	2801
supercont2.113	267565	271226	IES-00583-r6	3662
supercont2.113	273036	273931	IES-00584-r9	896
supercont2.113	275407	277438	IES-00585-r10	2032
supercont2.113	282642	284580	IES-00586-r11	1939
supercont2.113	285466	291642	IES-00587-r11	6177
supercont2.113	300613	303451	IES-00588-r9	2839
supercont2.114	5562	7374	IES-00591-r16	1813
supercont2.114	24167	36322	IES-00592-r4	12156
supercont2.114	50783	56894	IES-00593-r13	6112
supercont2.114	58116	63670	IES-00594-r4	5555
supercont2.114	70386	70845	IES-00595-r8	460
supercont2.114	73209	77968	IES-00596-r13	4760
supercont2.114	79047	79716	IES-00597-r12	670
supercont2.114	87499	92762	IES-00598-r11	5264
supercont2.114	95605	97914	IES-00599-r12	2310
supercont2.114	129708	134381	IES-00600-r11	4674
supercont2.114	136733	140467	IES-00601-r10	3735
supercont2.114	142324	153235	IES-00602-r21	10912
supercont2.114	155646	160435	IES-00603-r10	4790
supercont2.114	167932	171719	IES-00604-r16	3788
supercont2.114	174411	175598	IES-00605-r19	1188
supercont2.114	178069	181646	IES-00606-r11	3578
supercont2.114	206149	208214	IES-00607-r7	2066
supercont2.114	222215	226276	IES-00608-r15	4062
supercont2.114	240588	245091	IES-00609-r12	4504
supercont2.114	250544	253351	IES-00610-r18	2808
supercont2.114	256025	264214	IES-00611-r10	8190
supercont2.114	267873	277544	IES-00612-r16	9672
supercont2.114	280483	296055	IES-00613-r11	15573
supercont2.114	299501	309797	IES-00614-r15	10297
supercont2.114	312706	317231	IES-00615-r17	4526
supercont2.114	320006	320715	IES-00616-r10	710
supercont2.114	323303	326004	IES-00617-r17	2702
supercont2.115	14065	14300	IES-00618-r14	236
supercont2.115	17139	18502	IES-00619-r11	1364
supercont2.115	31199	33002	IES-00620-r12	1804
supercont2.115	50536	51615	IES-00621-r7	1080
supercont2.115	52851	56413	IES-00622-r4	3563
supercont2.115	63974	65420	IES-00623-r12	1447
supercont2.115	70535	77261	IES-00624-r14	6727
supercont2.115	88367	92794	IES-00625-r12	4428
supercont2.115	114932	116969	IES-00626-r13	2038
supercont2.115	123446	139602	IES-00627-r7	16157
supercont2.115	155324	165149	IES-00628-r13	9826
supercont2.115	167342	167833	IES-00629-r3	492
supercont2.115	171372	176529	IES-00630-r12	5158
supercont2.115	189676	196807	IES-00632-r7	7132
supercont2.115	200719	202911	IES-00633-r5	2193
supercont2.115	216678	219710	IES-00634-r9	3033
supercont2.115	244920	246630	IES-00635-r10	1711
supercont2.115	261626	263455	IES-00636-r10	1830
supercont2.115	269524	277435	IES-00637-r18	7912
supercont2.115	292277	295990	IES-00638-r10	3714
supercont2.115	304999	309251	IES-00639-r11	4253
supercont2.115	313136	318399	IES-00640-r19	5264
supercont2.115	320659	324684	IES-00641-r14	4026
supercont2.115	329924	333594	IES-00642-r12	3671
supercont2.116	5475	7354	IES-00643-r12	1880
supercont2.116	10586	13633	IES-00644-r6	3048
supercont2.116	14709	17908	IES-00645-r6	3200
supercont2.116	18954	22697	IES-00646-r6	3744
supercont2.116	34205	35819	IES-00647-r8	1615
supercont2.116	40411	44071	IES-00648-r15	3661
supercont2.116	46415	46859	IES-00649-r5	445
supercont2.116	48036	51816	IES-00650-r7	3781
supercont2.116	53412	60004	IES-00651-r7	6593
supercont2.116	62618	67157	IES-00652-r7	4540
supercont2.116	68074	79773	IES-00653-r6	11700
supercont2.116	80571	85316	IES-00654-r8	4746
supercont2.116	92918	96078	IES-00655-r8	3161
supercont2.116	98162	103373	IES-00656-r7	5212
supercont2.116	105635	113776	IES-00657-r4	8142
supercont2.116	121293	123235	IES-00658-r6	1943
supercont2.116	126767	139112	IES-00659-r8	12346
supercont2.116	148012	161905	IES-00660-r10	13894
supercont2.116	169331	176403	IES-00661-r5	7073
supercont2.116	179211	182951	IES-00662-r9	3741
supercont2.116	184630	200945	IES-00663-r10	16316
supercont2.116	203719	210035	IES-00664-r10	6317
supercont2.116	231993	241379	IES-00665-r9	9387
supercont2.116	255206	258184	IES-00666-r16	2979
supercont2.116	260105	262571	IES-00667-r13	2467
supercont2.116	272284	273417	IES-00668-r9	1134
supercont2.116	281722	285062	IES-00669-r11	3341
supercont2.116	293376	302163	IES-00670-r19	8788
supercont2.116	304346	305449	IES-00671-r11	1104
supercont2.116	325424	329503	IES-00673-r10	4080
supercont2.117	31794	38188	IES-00675-r10	6395
supercont2.117	70799	73046	IES-00676-r16	2248
supercont2.117	75882	78856	IES-00677-r12	2975
supercont2.117	134085	135937	IES-00678-r6	1853
supercont2.117	138523	140659	IES-00679-r15	2137
supercont2.117	163395	164583	IES-00680-r14	1189
supercont2.117	195500	195749	IES-00681-r7	250
supercont2.117	253558	256560	IES-00682-r8	3003
supercont2.117	265995	267718	IES-00683-r16	1724
supercont2.117	296492	299817	IES-00684-r9	3326
supercont2.118	11786	20479	IES-00685-r17	8694
supercont2.118	40190	40895	IES-00686-r15	706
supercont2.118	44724	48492	IES-00687-r13	3769
supercont2.118	61006	64074	IES-00688-r9	3069
supercont2.118	78112	79452	IES-00689-r7	1341
supercont2.118	81303	82399	IES-00690-r6	1097
supercont2.118	83293	84098	IES-00691-r18	806
supercont2.118	93195	93692	IES-00692-r9	498
supercont2.118	103890	108759	IES-00693-r12	4870
supercont2.118	133391	140394	IES-00694-r7	7004
supercont2.118	168368	169344	IES-00695-r8	977
supercont2.118	175648	177903	IES-00696-r13	2256
supercont2.118	180590	183691	IES-00697-r8	3102
supercont2.118	189030	192192	IES-00698-r13	3163
supercont2.118	197577	198099	IES-00699-r7	523
supercont2.118	207868	217661	IES-00700-r5	9794
supercont2.118	219494	224770	IES-00701-r13	5277
supercont2.118	225752	228383	IES-00702-r13	2632
supercont2.118	232475	235091	IES-00703-r14	2617
supercont2.118	246640	248510	IES-00704-r14	1871
supercont2.118	253725	256651	IES-00705-r14	2927
supercont2.118	259383	265809	IES-00706-r8	6427
supercont2.118	274172	278190	IES-00707-r12	4019
supercont2.118	284392	286786	IES-00708-r14	2395
supercont2.118	288876	291719	IES-00709-r20	2844
supercont2.118	293549	302033	IES-00710-r15	8485
supercont2.118	321316	326315	IES-00711-r7	5000
supercont2.119	987	14517	IES-00712-r7	13531
supercont2.119	16108	23041	IES-00713-r7	6934
supercont2.119	33393	34511	IES-00714-r6	1119
supercont2.119	36133	37848	IES-00715-r6	1716
supercont2.119	44261	50842	IES-00716-r9	6582
supercont2.119	84851	90754	IES-00717-r12	5904
supercont2.119	99622	102673	IES-00718-r7	3052
supercont2.119	106914	108851	IES-00719-r13	1938
supercont2.119	113603	115036	IES-00720-r22	1434
supercont2.119	138586	142058	IES-00721-r18	3473
supercont2.119	144793	148408	IES-00722-r12	3616
supercont2.119	185169	188210	IES-00723-r20	3042
supercont2.119	192593	199096	IES-00724-r8	6504
supercont2.119	202158	206165	IES-00725-r17	4008
supercont2.119	229814	231162	IES-00726-r9	1349
supercont2.119	234727	236150	IES-00727-r9	1424
supercont2.119	238230	240963	IES-00728-r12	2734
supercont2.119	246723	249033	IES-00729-r18	2311
supercont2.119	252072	255993	IES-00730-r18	3922
supercont2.119	271119	273388	IES-00731-r20	2270
supercont2.119	277450	279245	IES-00732-r14	1796
supercont2.119	300329	306307	IES-00733-r15	5979
supercont2.119	309466	310985	IES-00734-r12	1520
supercont2.119	312238	317380	IES-00735-r8	5143
supercont2.119	322132	323505	IES-00736-r10	1374
supercont2.119	336578	339252	IES-00737-r6	2675
supercont2.12	36056	38312	IES-00738-r14	2257
supercont2.12	44929	46457	IES-00739-r14	1529
supercont2.12	72066	73114	IES-00740-r23	1049
supercont2.12	78519	81590	IES-00741-r15	3072
supercont2.12	161723	163872	IES-00742-r14	2150
supercont2.12	178918	180582	IES-00743-r15	1665
supercont2.12	199664	200230	IES-00744-r14	567
supercont2.12	237536	243329	IES-00745-r8	5794
supercont2.12	261326	261985	IES-00746-r19	660
supercont2.12	356742	359005	IES-00747-r11	2264
supercont2.12	373432	377035	IES-00748-r12	3604
supercont2.12	384932	386360	IES-00749-r10	1429
supercont2.12	444550	447540	IES-00750-r3	2991
supercont2.12	474902	475931	IES-00751-r16	1030
supercont2.12	560111	565279	IES-00752-r10	5169
supercont2.12	570501	571315	IES-00753-r6	815
supercont2.12	580307	582097	IES-00754-r17	1791
supercont2.12	590026	591180	IES-00755-r20	1155
supercont2.12	611981	612807	IES-00756-r6	827
supercont2.12	615235	620324	IES-00757-r10	5090
supercont2.12	717714	718338	IES-00758-r25	625
supercont2.12	728076	730572	IES-00759-r15	2497
supercont2.12	771249	776495	IES-00760-r12	5247
supercont2.12	781004	785175	IES-00761-r7	4172
supercont2.12	795653	797235	IES-00763-r21	1583
supercont2.12	830525	832854	IES-00764-r16	2330
supercont2.12	867278	869079	IES-00765-r9	1802
supercont2.12	875096	876054	IES-00766-r12	959
supercont2.12	944495	947212	IES-00767-r13	2718
supercont2.12	967953	969010	IES-00768-r10	1058
supercont2.12	1046243	1049531	IES-00769-r10	3289
supercont2.12	1052380	1053248	IES-00770-r16	869
supercont2.12	1060916	1063184	IES-00771-r9	2269
supercont2.12	1068303	1072996	IES-00772-r8	4694
supercont2.12	1089627	1090847	IES-00773-r12	1221
supercont2.12	1092132	1095017	IES-00774-r8	2886
supercont2.12	1096118	1098712	IES-00775-r7	2595
supercont2.12	1111715	1113681	IES-00776-r17	1967
supercont2.12	1131280	1131853	IES-00777-r8	574
supercont2.12	1136470	1138135	IES-00778-r5	1666
supercont2.12	1186456	1189709	IES-00779-r18	3254
supercont2.12	1277917	1279235	IES-00781-r13	1319
supercont2.12	1335169	1337401	IES-00782-r9	2233
supercont2.12	1389455	1391798	IES-00783-r14	2344
supercont2.12	1397642	1400810	IES-00784-r14	3169
supercont2.12	1491626	1499517	IES-00785-r8	7892
supercont2.12	1501020	1502868	IES-00786-r12	1849
supercont2.12	1506028	1510870	IES-00787-r16	4843
supercont2.12	1515818	1519229	IES-00788-r13	3412
supercont2.12	1523635	1525113	IES-00789-r12	1479
supercont2.12	1528237	1531412	IES-00790-r16	3176
supercont2.12	1533990	1534383	IES-00791-r13	394
supercont2.12	1551243	1553804	IES-00792-r22	2562
supercont2.12	1564622	1565632	IES-00793-r18	1011
supercont2.12	1592265	1593212	IES-00794-r17	948
supercont2.12	1602163	1605071	IES-00795-r17	2909
supercont2.12	1618144	1619008	IES-00796-r14	865
supercont2.12	1629549	1632171	IES-00797-r15	2623
supercont2.12	1671775	1673949	IES-00798-r22	2175
supercont2.12	1684200	1691505	IES-00799-r10	7306
supercont2.12	1704452	1706551	IES-00800-r12	2100
supercont2.12	1707710	1710353	IES-00801-r12	2644
supercont2.12	1711722	1713944	IES-00802-r8	2223
supercont2.12	1716047	1718731	IES-00803-r12	2685
supercont2.12	1720287	1723980	IES-00804-r12	3694
supercont2.12	1735474	1736217	IES-00805-r14	744
supercont2.120	12008	12408	IES-00806-r16	401
supercont2.120	35438	39959	IES-00807-r17	4522
supercont2.120	51498	51944	IES-00808-r21	447
supercont2.120	60830	62384	IES-00809-r16	1555
supercont2.120	141670	145416	IES-00810-r10	3747
supercont2.120	160818	163564	IES-00811-r12	2747
supercont2.120	196053	198156	IES-00812-r19	2104
supercont2.120	236984	237797	IES-00813-r12	814
supercont2.120	243098	244566	IES-00814-r12	1469
supercont2.120	264534	267427	IES-00815-r17	2894
supercont2.120	288654	290638	IES-00816-r10	1985
supercont2.120	305700	307930	IES-00817-r9	2231
supercont2.121	24918	31707	IES-00818-r12	6790
supercont2.121	34822	37429	IES-00819-r10	2608
supercont2.121	50868	57243	IES-00820-r15	6376
supercont2.121	58859	59786	IES-00821-r15	928
supercont2.121	69729	72280	IES-00822-r9	2552
supercont2.121	91447	96246	IES-00823-r12	4800
supercont2.121	98190	99482	IES-00824-r14	1293
supercont2.121	135208	140086	IES-00825-r15	4879
supercont2.121	145707	149410	IES-00826-r18	3704
supercont2.121	153564	156935	IES-00827-r13	3372
supercont2.121	177779	183480	IES-00828-r16	5702
supercont2.121	204362	206811	IES-00829-r12	2450
supercont2.121	211010	220819	IES-00830-r12	9810
supercont2.121	226639	228623	IES-00831-r9	1985
supercont2.121	229063	233083	IES-00832-r12	4021
supercont2.121	235695	238185	IES-00833-r21	2491
supercont2.121	248991	253645	IES-00834-r14	4655
supercont2.121	264250	269041	IES-00835-r9	4792
supercont2.122	12591	14108	IES-00836-r18	1518
supercont2.122	18282	30530	IES-00837-r10	12249
supercont2.122	35362	40473	IES-00838-r13	5112
supercont2.122	86590	87690	IES-00839-r9	1101
supercont2.122	190369	192498	IES-00840-r16	2130
supercont2.122	202045	204656	IES-00841-r13	2612
supercont2.122	284510	285902	IES-00842-r16	1393
supercont2.123	18810	21091	IES-00843-r13	2282
supercont2.123	32273	34272	IES-00844-r14	2000
supercont2.123	42417	44988	IES-00845-r10	2572
supercont2.123	52129	54648	IES-00846-r12	2520
supercont2.123	61757	65398	IES-00847-r9	3642
supercont2.123	89899	91192	IES-00848-r12	1294
supercont2.123	98240	99072	IES-00849-r14	833
supercont2.123	109800	111189	IES-00850-r19	1390
supercont2.123	124879	126722	IES-00851-r11	1844
supercont2.123	132988	134708	IES-00852-r12	1721
supercont2.123	136567	138782	IES-00853-r15	2216
supercont2.123	141030	142933	IES-00854-r9	1904
supercont2.123	151815	154320	IES-00855-r6	2506
supercont2.123	155441	160652	IES-00856-r13	5212
supercont2.123	166355	167467	IES-00857-r16	1113
supercont2.123	176853	178191	IES-00858-r10	1339
supercont2.123	180788	182374	IES-00859-r19	1587
supercont2.123	199067	201667	IES-00860-r13	2601
supercont2.123	210963	212353	IES-00861-r20	1391
supercont2.123	214539	215544	IES-00862-r12	1006
supercont2.123	222317	227008	IES-00863-r8	4692
supercont2.123	240973	243213	IES-00864-r14	2241
supercont2.123	258279	276738	IES-00865-r4	18460
supercont2.123	285123	293735	IES-00866-r3	8613
supercont2.123	304902	314880	IES-00867-r13	9979
supercont2.124	33198	37169	IES-00868-r8	3972
supercont2.124	52251	59429	IES-00869-r12	7179
supercont2.124	74638	75087	IES-00870-r7	450
supercont2.124	76485	78227	IES-00871-r14	1743
supercont2.124	124683	128810	IES-00872-r21	4128
supercont2.124	129693	130740	IES-00873-r16	1048
supercont2.124	136995	140571	IES-00874-r17	3577
supercont2.124	143059	145664	IES-00875-r12	2606
supercont2.124	154897	157239	IES-00876-r13	2343
supercont2.124	160247	167339	IES-00877-r25	7093
supercont2.124	171546	174940	IES-00878-r12	3395
supercont2.124	179712	181465	IES-00879-r16	1754
supercont2.124	187252	194990	IES-00880-r8	7739
supercont2.124	197288	198566	IES-00881-r8	1279
supercont2.124	203272	213680	IES-00882-r9	10409
supercont2.124	218056	224932	IES-00883-r13	6877
supercont2.124	229827	251604	IES-00884-r11	21778
supercont2.124	264554	266700	IES-00885-r12	2147
supercont2.124	268708	273176	IES-00886-r13	4469
supercont2.124	276234	281491	IES-00887-r8	5258
supercont2.124	286969	293215	IES-00888-r17	6247
supercont2.124	299046	305533	IES-00889-r11	6488
supercont2.124	308127	312038	IES-00890-r11	3912
supercont2.125	727	23263	IES-00891-r12	22537
supercont2.125	32269	39843	IES-00892-r8	7575
supercont2.125	42581	45592	IES-00893-r14	3012
supercont2.125	48379	52384	IES-00894-r17	4006
supercont2.125	53758	56149	IES-00895-r11	2392
supercont2.125	57429	59021	IES-00896-r13	1593
supercont2.125	65526	68564	IES-00897-r14	3039
supercont2.125	90412	94683	IES-00898-r12	4272
supercont2.125	112958	114221	IES-00899-r6	1264
supercont2.125	116923	120402	IES-00900-r12	3480
supercont2.125	129157	139626	IES-00901-r13	10470
supercont2.125	146377	150722	IES-00902-r12	4346
supercont2.125	152832	157280	IES-00903-r7	4449
supercont2.125	161166	162201	IES-00904-r12	1036
supercont2.125	164241	175995	IES-00905-r9	11755
supercont2.125	182417	189237	IES-00906-r10	6821
supercont2.125	192912	197161	IES-00907-r9	4250
supercont2.125	199262	206487	IES-00908-r15	7226
supercont2.125	257004	267087	IES-00909-r5	10084
supercont2.125	282654	284874	IES-00910-r18	2221
supercont2.125	290179	292214	IES-00911-r3	2036
supercont2.126	27890	31405	IES-00912-r13	3516
supercont2.126	45646	46466	IES-00913-r12	821
supercont2.126	83121	85259	IES-00914-r18	2139
supercont2.126	95097	95692	IES-00915-r8	596
supercont2.126	100036	100910	IES-00916-r10	875
supercont2.126	114647	117297	IES-00917-r3	2651
supercont2.126	124390	128876	IES-00918-r6	4487
supercont2.126	133657	138264	IES-00919-r13	4608
supercont2.126	161618	165041	IES-00920-r7	3424
supercont2.126	177039	179458	IES-00921-r16	2420
supercont2.126	288781	290154	IES-00922-r14	1374
supercont2.127	15919	18429	IES-00923-r10	2511
supercont2.127	31755	35319	IES-00924-r9	3565
supercont2.127	42126	43782	IES-00925-r14	1657
supercont2.127	61283	63001	IES-00926-r16	1719
supercont2.127	69339	70820	IES-00927-r19	1482
supercont2.127	174889	175200	IES-00928-r5	312
supercont2.127	184346	187783	IES-00929-r18	3438
supercont2.127	198533	200731	IES-00930-r15	2199
supercont2.127	230388	232135	IES-00931-r17	1748
supercont2.127	246684	250164	IES-00932-r11	3481
supercont2.127	283344	285583	IES-00933-r5	2240
supercont2.128	45340	48773	IES-00934-r8	3434
supercont2.128	51271	62108	IES-00935-r8	10838
supercont2.128	63497	68659	IES-00936-r8	5163
supercont2.128	87916	90981	IES-00937-r12	3066
supercont2.128	105375	106969	IES-00938-r6	1595
supercont2.128	121767	122609	IES-00939-r22	843
supercont2.128	123811	127610	IES-00940-r16	3800
supercont2.128	134890	137791	IES-00941-r17	2902
supercont2.128	138650	141629	IES-00942-r9	2980
supercont2.128	143724	146744	IES-00943-r15	3021
supercont2.128	152588	154562	IES-00944-r6	1975
supercont2.128	159294	161645	IES-00945-r16	2352
supercont2.128	174617	178140	IES-00946-r10	3524
supercont2.128	194788	199247	IES-00947-r18	4460
supercont2.128	204932	211859	IES-00948-r8	6928
supercont2.128	212801	215894	IES-00949-r11	3094
supercont2.128	242853	244029	IES-00950-r8	1177
supercont2.128	247615	250762	IES-00951-r8	3148
supercont2.128	259527	264456	IES-00952-r17	4930
supercont2.129	29865	30569	IES-00953-r14	705
supercont2.129	51332	51818	IES-00954-r12	487
supercont2.129	55139	56140	IES-00955-r11	1002
supercont2.129	58715	61397	IES-00956-r12	2683
supercont2.129	68817	70058	IES-00957-r19	1242
supercont2.129	77598	79458	IES-00958-r11	1861
supercont2.129	101660	103828	IES-00959-r12	2169
supercont2.129	106025	111405	IES-00960-r7	5381
supercont2.129	114543	121188	IES-00961-r8	6646
supercont2.129	122504	124411	IES-00962-r5	1908
supercont2.129	129406	130176	IES-00963-r14	771
supercont2.129	142255	143562	IES-00964-r10	1308
supercont2.129	181046	184221	IES-00965-r11	3176
supercont2.129	196956	198098	IES-00966-r16	1143
supercont2.129	203919	211987	IES-00967-r6	8069
supercont2.129	213949	216661	IES-00968-r18	2713
supercont2.129	223002	228733	IES-00969-r8	5732
supercont2.129	245365	253844	IES-00970-r26	8480
supercont2.129	264984	268868	IES-00971-r7	3885
supercont2.129	287773	288210	IES-00972-r9	438
supercont2.129	290386	293359	IES-00973-r9	2974
supercont2.13	1467	7511	IES-00974-r5	6045
supercont2.13	22115	25512	IES-00975-r6	3398
supercont2.13	27662	42761	IES-00976-r9	15100
supercont2.13	55406	61043	IES-00977-r10	5638
supercont2.13	63396	67766	IES-00978-r5	4371
supercont2.13	74967	83842	IES-00979-r14	8876
supercont2.13	88152	96569	IES-00980-r13	8418
supercont2.13	99257	108866	IES-00981-r11	9610
supercont2.13	156363	164677	IES-00982-r14	8315
supercont2.13	167818	173258	IES-00983-r12	5441
supercont2.13	186317	190227	IES-00984-r11	3911
supercont2.13	200446	204924	IES-00985-r18	4479
supercont2.13	247885	251696	IES-00986-r14	3812
supercont2.13	259546	262802	IES-00987-r10	3257
supercont2.13	338427	342646	IES-00988-r6	4220
supercont2.13	361424	364027	IES-00989-r10	2604
supercont2.13	374890	376005	IES-00990-r10	1116
supercont2.13	383746	386056	IES-00991-r11	2311
supercont2.13	404247	405604	IES-00992-r12	1358
supercont2.13	442315	447007	IES-00993-r8	4693
supercont2.13	483170	484879	IES-00994-r10	1710
supercont2.13	503098	504649	IES-00995-r19	1552
supercont2.13	511313	515964	IES-00996-r12	4652
supercont2.13	547407	550329	IES-00997-r15	2923
supercont2.13	559047	563256	IES-00998-r15	4210
supercont2.13	582485	584271	IES-00999-r12	1787
supercont2.13	603221	607177	IES-01000-r15	3957
supercont2.13	623849	625451	IES-01001-r7	1603
supercont2.13	644685	645840	IES-01002-r16	1156
supercont2.13	653074	658494	IES-01003-r13	5421
supercont2.13	671872	673158	IES-01004-r17	1287
supercont2.13	674686	680232	IES-01005-r13	5552
supercont2.13	694010	695916	IES-01006-r8	1907
supercont2.13	701772	704339	IES-01007-r11	2568
supercont2.13	709883	710334	IES-01008-r7	452
supercont2.13	725012	727494	IES-01009-r15	2483
supercont2.13	729926	731271	IES-01010-r10	1346
supercont2.13	748304	749395	IES-01011-r11	1092
supercont2.13	754888	758486	IES-01012-r9	3599
supercont2.13	790003	792410	IES-01013-r19	2408
supercont2.13	798854	800194	IES-01014-r16	1341
supercont2.13	803493	804707	IES-01015-r17	1215
supercont2.13	836030	839058	IES-01016-r14	3029
supercont2.13	883809	898017	IES-01017-r8	14209
supercont2.13	910959	920413	IES-01018-r15	9455
supercont2.13	927773	930281	IES-01019-r10	2509
supercont2.13	931374	949973	IES-01020-r9	18600
supercont2.13	951160	953137	IES-01021-r13	1978
supercont2.13	955387	959869	IES-01022-r14	4483
supercont2.13	975100	976246	IES-01023-r12	1147
supercont2.13	978011	982984	IES-01024-r9	4974
supercont2.13	994827	998217	IES-01025-r18	3391
supercont2.13	1006455	1007090	IES-01026-r13	636
supercont2.13	1010982	1013217	IES-01027-r8	2236
supercont2.13	1032618	1035767	IES-01028-r15	3150
supercont2.13	1070267	1074307	IES-01029-r15	4041
supercont2.13	1078439	1084179	IES-01030-r22	5741
supercont2.13	1122863	1127006	IES-01031-r10	4144
supercont2.13	1140367	1141589	IES-01032-r9	1223
supercont2.13	1145178	1147667	IES-01033-r12	2490
supercont2.13	1163551	1167912	IES-01034-r12	4362
supercont2.13	1172542	1175905	IES-01035-r8	3364
supercont2.13	1180049	1181978	IES-01036-r12	1930
supercont2.13	1189068	1189889	IES-01037-r14	822
supercont2.13	1221722	1222772	IES-01038-r13	1051
supercont2.13	1270231	1275069	IES-01039-r5	4839
supercont2.13	1277778	1284674	IES-01040-r8	6897
supercont2.13	1288206	1290132	IES-01041-r15	1927
supercont2.13	1291679	1294118	IES-01042-r15	2440
supercont2.13	1299433	1303776	IES-01043-r9	4344
supercont2.13	1307377	1309268	IES-01044-r14	1892
supercont2.13	1310702	1312041	IES-01045-r16	1340
supercont2.13	1327787	1331359	IES-01046-r11	3573
supercont2.13	1359836	1362656	IES-01047-r9	2821
supercont2.13	1364437	1377952	IES-01048-r14	13516
supercont2.13	1380546	1388774	IES-01049-r14	8229
supercont2.13	1391928	1392974	IES-01050-r15	1047
supercont2.13	1431870	1434723	IES-01051-r8	2854
supercont2.13	1440074	1441802	IES-01052-r9	1729
supercont2.13	1444102	1446238	IES-01053-r6	2137
supercont2.13	1511411	1517220	IES-01054-r11	5810
supercont2.13	1519465	1520632	IES-01055-r3	1168
supercont2.13	1521744	1528362	IES-01056-r8	6619
supercont2.13	1555479	1558750	IES-01057-r8	3272
supercont2.13	1582586	1585138	IES-01058-r8	2553
supercont2.13	1587743	1589264	IES-01059-r8	1522
supercont2.13	1602586	1605216	IES-01060-r17	2631
supercont2.13	1613320	1614162	IES-01061-r15	843
supercont2.13	1633332	1633969	IES-01062-r11	638
supercont2.13	1649851	1663763	IES-01063-r10	13913
supercont2.13	1666038	1677080	IES-01064-r8	11043
supercont2.13	1680275	1682606	IES-01065-r8	2332
supercont2.13	1683619	1690214	IES-01066-r9	6596
supercont2.130	1807	2531	IES-01067-r17	725
supercont2.130	11713	12730	IES-01068-r14	1018
supercont2.130	37732	39523	IES-01069-r9	1792
supercont2.130	84830	86841	IES-01070-r27	2012
supercont2.130	98059	98926	IES-01071-r18	868
supercont2.130	135561	137225	IES-01072-r14	1665
supercont2.130	159424	160923	IES-01073-r21	1500
supercont2.130	186501	188168	IES-01074-r19	1668
supercont2.130	214009	218033	IES-01075-r16	4025
supercont2.130	223222	225986	IES-01076-r12	2765
supercont2.130	240073	242220	IES-01077-r21	2148
supercont2.130	272798	275429	IES-01078-r13	2632
supercont2.130	277820	285607	IES-01079-r13	7788
supercont2.131	10795	13751	IES-01080-r8	2957
supercont2.131	35764	38057	IES-01081-r6	2294
supercont2.131	91996	103239	IES-01082-r16	11244
supercont2.131	107041	118123	IES-01083-r12	11083
supercont2.131	136236	137202	IES-01084-r10	967
supercont2.131	142151	145541	IES-01085-r14	3391
supercont2.131	184249	190013	IES-01086-r14	5765
supercont2.131	201118	211174	IES-01087-r16	10057
supercont2.131	213871	221159	IES-01088-r14	7289
supercont2.131	239723	242462	IES-01089-r15	2740
supercont2.131	245210	247160	IES-01090-r10	1951
supercont2.132	25078	29789	IES-01091-r9	4712
supercont2.132	57799	61679	IES-01092-r4	3881
supercont2.132	101668	108123	IES-01093-r12	6456
supercont2.132	115637	118685	IES-01094-r13	3049
supercont2.132	122231	131495	IES-01095-r11	9265
supercont2.132	147578	149555	IES-01096-r15	1978
supercont2.132	156033	161505	IES-01097-r16	5473
supercont2.132	164840	167270	IES-01098-r13	2431
supercont2.132	168545	171305	IES-01099-r8	2761
supercont2.132	172679	184917	IES-01100-r12	12239
supercont2.132	201866	213428	IES-01101-r14	11563
supercont2.132	214636	217786	IES-01102-r12	3151
supercont2.132	218482	222796	IES-01103-r15	4315
supercont2.132	226239	231621	IES-01104-r9	5383
supercont2.132	232973	236972	IES-01105-r10	4000
supercont2.132	238767	240186	IES-01106-r12	1420
supercont2.132	260578	262651	IES-01107-r12	2074
supercont2.132	283935	290852	IES-01108-r10	6918
supercont2.133	9427	11187	IES-01109-r10	1761
supercont2.133	41367	43116	IES-01110-r13	1750
supercont2.133	45072	55755	IES-01111-r6	10684
supercont2.133	57202	60677	IES-01112-r15	3476
supercont2.133	69878	71399	IES-01113-r9	1522
supercont2.133	83190	88900	IES-01114-r8	5711
supercont2.133	90446	97555	IES-01115-r9	7110
supercont2.133	102123	102425	IES-01116-r9	303
supercont2.133	105004	106603	IES-01117-r10	1600
supercont2.133	114539	116320	IES-01118-r13	1782
supercont2.133	130513	139302	IES-01119-r15	8790
supercont2.133	149461	153724	IES-01120-r19	4264
supercont2.133	191221	196167	IES-01121-r9	4947
supercont2.133	237577	239134	IES-01122-r13	1558
supercont2.133	247528	251018	IES-01123-r15	3491
supercont2.133	255415	255768	IES-01124-r13	354
supercont2.133	270255	284038	IES-01125-r14	13784
supercont2.134	13190	14404	IES-01126-r9	1215
supercont2.134	27368	31544	IES-01127-r10	4177
supercont2.134	33487	50796	IES-01128-r6	17310
supercont2.134	51848	56072	IES-01129-r7	4225
supercont2.134	62206	67514	IES-01130-r11	5309
supercont2.134	68833	73106	IES-01131-r15	4274
supercont2.134	74773	77078	IES-01132-r11	2306
supercont2.134	82711	86663	IES-01133-r10	3953
supercont2.134	121910	123254	IES-01134-r16	1345
supercont2.134	131206	136288	IES-01135-r17	5083
supercont2.134	154947	157768	IES-01136-r16	2822
supercont2.134	161299	170529	IES-01137-r13	9231
supercont2.134	192668	207167	IES-01138-r5	14500
supercont2.134	208459	213986	IES-01139-r6	5528
supercont2.134	221226	223031	IES-01140-r7	1806
supercont2.134	225483	226984	IES-01141-r7	1502
supercont2.134	262102	265937	IES-01142-r18	3836
supercont2.134	270449	270689	IES-01143-r18	241
supercont2.134	273892	277795	IES-01144-r8	3904
supercont2.135	3616	10936	IES-01145-r7	7321
supercont2.135	12795	15171	IES-01146-r10	2377
supercont2.135	16485	20592	IES-01147-r9	4108
supercont2.135	31060	34075	IES-01148-r3	3016
supercont2.135	43323	54371	IES-01149-r11	11049
supercont2.135	55936	60265	IES-01150-r13	4330
supercont2.135	61876	64239	IES-01151-r19	2364
supercont2.135	105710	107542	IES-01152-r4	1833
supercont2.135	109674	125340	IES-01153-r5	15667
supercont2.135	127479	128331	IES-01154-r6	853
supercont2.135	131169	131523	IES-01155-r6	355
supercont2.135	190833	196940	IES-01156-r8	6108
supercont2.135	207093	212070	IES-01157-r11	4978
supercont2.135	238056	241138	IES-01158-r15	3083
supercont2.135	243252	245799	IES-01159-r14	2548
supercont2.135	250566	254926	IES-01160-r19	4361
supercont2.135	262311	265202	IES-01161-r9	2892
supercont2.136	10871	20314	IES-01162-r20	9444
supercont2.136	29225	31665	IES-01163-r13	2441
supercont2.136	54162	59759	IES-01164-r16	5598
supercont2.136	82803	95923	IES-01165-r3	13121
supercont2.136	109091	115090	IES-01166-r12	6000
supercont2.136	147363	149547	IES-01167-r7	2185
supercont2.136	157761	161356	IES-01168-r15	3596
supercont2.136	164285	167842	IES-01169-r17	3558
supercont2.136	195096	200312	IES-01170-r12	5217
supercont2.136	212667	215247	IES-01171-r23	2581
supercont2.136	216146	221273	IES-01172-r14	5128
supercont2.136	235205	237916	IES-01173-r10	2712
supercont2.136	239584	250600	IES-01174-r9	11017
supercont2.136	253938	261282	IES-01175-r23	7345
supercont2.136	270731	274596	IES-01176-r22	3866
supercont2.137	3325	18796	IES-01177-r9	15472
supercont2.137	19853	23640	IES-01178-r9	3788
supercont2.137	24774	25955	IES-01179-r15	1182
supercont2.137	71182	74457	IES-01180-r12	3276
supercont2.137	84591	90414	IES-01181-r3	5824
supercont2.137	105533	108353	IES-01182-r8	2821
supercont2.137	143693	147634	IES-01183-r14	3942
supercont2.137	154270	157422	IES-01184-r16	3153
supercont2.137	165318	167354	IES-01185-r14	2037
supercont2.137	175459	176699	IES-01186-r20	1241
supercont2.137	203422	207248	IES-01187-r26	3827
supercont2.137	215947	218936	IES-01188-r61	2990
supercont2.137	219700	225813	IES-01189-r60	6114
supercont2.137	232381	240840	IES-01190-r15	8460
supercont2.137	241885	248712	IES-01191-r3	6828
supercont2.137	255255	257891	IES-01192-r17	2637
supercont2.137	277638	280826	IES-01193-r15	3189
supercont2.138	6913	13814	IES-01194-r9	6902
supercont2.138	16346	19334	IES-01195-r12	2989
supercont2.138	33778	42551	IES-01196-r10	8774
supercont2.138	44435	48618	IES-01197-r12	4184
supercont2.138	51014	53401	IES-01198-r19	2388
supercont2.138	56637	58945	IES-01199-r14	2309
supercont2.138	70150	73052	IES-01200-r8	2903
supercont2.138	84250	89708	IES-01201-r8	5459
supercont2.138	92189	93190	IES-01202-r8	1002
supercont2.138	96188	98039	IES-01203-r3	1852
supercont2.138	100219	102666	IES-01204-r15	2448
supercont2.138	104221	108771	IES-01205-r7	4551
supercont2.138	110548	113313	IES-01206-r12	2766
supercont2.138	114329	117313	IES-01207-r3	2985
supercont2.138	124020	157904	IES-01208-r3	33885
supercont2.139	1413	4366	IES-01210-r11	2954
supercont2.139	7837	12671	IES-01211-r12	4835
supercont2.139	123260	126213	IES-01212-r13	2954
supercont2.139	183539	185868	IES-01213-r12	2330
supercont2.139	232435	234729	IES-01214-r10	2295
supercont2.139	238249	240542	IES-01215-r16	2294
supercont2.139	260196	261477	IES-01216-r18	1282
supercont2.14	1545	9937	IES-01217-r9	8393
supercont2.14	13266	14410	IES-01218-r11	1145
supercont2.14	16768	24589	IES-01219-r10	7822
supercont2.14	26273	37603	IES-01220-r12	11331
supercont2.14	40845	42538	IES-01221-r13	1694
supercont2.14	49098	52612	IES-01222-r15	3515
supercont2.14	138701	139585	IES-01223-r8	885
supercont2.14	168170	171125	IES-01224-r7	2956
supercont2.14	172180	179891	IES-01225-r10	7712
supercont2.14	185251	188572	IES-01226-r8	3322
supercont2.14	246728	252048	IES-01227-r13	5321
supercont2.14	286297	286939	IES-01228-r14	643
supercont2.14	355586	356012	IES-01229-r19	427
supercont2.14	399470	403215	IES-01230-r14	3746
supercont2.14	429593	432006	IES-01231-r12	2414
supercont2.14	472462	477418	IES-01232-r15	4957
supercont2.14	514904	516942	IES-01233-r13	2039
supercont2.14	522341	524294	IES-01234-r12	1954
supercont2.14	543532	546337	IES-01235-r17	2806
supercont2.14	592071	594104	IES-01236-r7	2034
supercont2.14	648614	652333	IES-01237-r15	3720
supercont2.14	711560	715075	IES-01238-r17	3516
supercont2.14	758976	760680	IES-01239-r19	1705
supercont2.14	774556	777498	IES-01240-r16	2943
supercont2.14	784073	787997	IES-01241-r13	3925
supercont2.14	805978	807459	IES-01242-r16	1482
supercont2.14	817614	818068	IES-01243-r10	455
supercont2.14	832136	837463	IES-01244-r10	5328
supercont2.14	855308	856677	IES-01245-r17	1370
supercont2.14	923579	924754	IES-01246-r14	1176
supercont2.14	932888	934181	IES-01247-r18	1294
supercont2.14	942527	948710	IES-01248-r20	6184
supercont2.14	952515	956728	IES-01249-r12	4214
supercont2.14	993532	996469	IES-01250-r14	2938
supercont2.14	1009655	1012544	IES-01251-r14	2890
supercont2.14	1255686	1258100	IES-01252-r11	2415
supercont2.14	1270560	1272551	IES-01253-r15	1992
supercont2.14	1316387	1319801	IES-01254-r19	3415
supercont2.14	1322513	1326508	IES-01255-r9	3996
supercont2.14	1346966	1348558	IES-01256-r15	1593
supercont2.14	1410314	1412227	IES-01257-r17	1914
supercont2.14	1418165	1418861	IES-01258-r17	697
supercont2.14	1460474	1463287	IES-01259-r15	2814
supercont2.140	18900	23223	IES-01260-r23	4324
supercont2.140	102458	106130	IES-01261-r17	3673
supercont2.140	120566	123238	IES-01262-r9	2673
supercont2.140	138304	139400	IES-01263-r14	1097
supercont2.140	147235	147665	IES-01264-r19	431
supercont2.140	153974	158293	IES-01265-r13	4320
supercont2.140	166941	169577	IES-01266-r12	2637
supercont2.140	174242	177207	IES-01267-r12	2966
supercont2.140	235578	238584	IES-01268-r16	3007
supercont2.140	240933	243691	IES-01269-r14	2759
supercont2.141	21589	33854	IES-01270-r13	12266
supercont2.141	48606	61928	IES-01271-r17	13323
supercont2.141	64544	73257	IES-01272-r19	8714
supercont2.141	75808	79082	IES-01273-r15	3275
supercont2.141	81683	86296	IES-01274-r6	4614
supercont2.141	90101	93752	IES-01275-r16	3652
supercont2.141	95704	97772	IES-01276-r25	2069
supercont2.141	100048	102282	IES-01277-r12	2235
supercont2.141	130743	134844	IES-01278-r8	4102
supercont2.141	137356	140386	IES-01279-r10	3031
supercont2.141	142479	146732	IES-01280-r14	4254
supercont2.141	156981	161103	IES-01281-r14	4123
supercont2.141	180480	184769	IES-01282-r4	4290
supercont2.141	189675	196131	IES-01283-r4	6457
supercont2.141	202341	206634	IES-01284-r3	4294
supercont2.141	213649	220824	IES-01285-r6	7176
supercont2.141	229512	233893	IES-01286-r12	4382
supercont2.141	235160	236690	IES-01287-r9	1531
supercont2.141	242913	245616	IES-01288-r11	2704
supercont2.142	16825	20209	IES-01291-r9	3385
supercont2.142	26211	28123	IES-01292-r6	1913
supercont2.142	30798	35567	IES-01293-r7	4770
supercont2.142	36911	40516	IES-01294-r5	3606
supercont2.142	41840	48625	IES-01295-r8	6786
supercont2.142	53206	58771	IES-01296-r3	5566
supercont2.142	60013	78555	IES-01297-r4	18543
supercont2.142	81446	82050	IES-01298-r11	605
supercont2.142	83711	87220	IES-01299-r9	3510
supercont2.142	88235	99667	IES-01300-r10	11433
supercont2.142	102684	113103	IES-01301-r10	10420
supercont2.142	126463	130030	IES-01302-r10	3568
supercont2.142	142555	151196	IES-01303-r5	8642
supercont2.142	173186	175726	IES-01304-r11	2541
supercont2.142	228424	231996	IES-01305-r13	3573
supercont2.142	238480	246678	IES-01306-r9	8199
supercont2.143	42255	46095	IES-01307-r6	3841
supercont2.143	47769	50700	IES-01308-r11	2932
supercont2.143	52509	56325	IES-01309-r9	3817
supercont2.143	60880	69811	IES-01310-r15	8932
supercont2.143	87172	114407	IES-01311-r7	27236
supercont2.143	137144	142473	IES-01312-r10	5330
supercont2.143	145514	154327	IES-01313-r5	8814
supercont2.143	156843	165152	IES-01314-r6	8310
supercont2.143	174061	181472	IES-01315-r4	7412
supercont2.143	182566	188514	IES-01316-r4	5949
supercont2.143	193258	197953	IES-01317-r12	4696
supercont2.143	223523	226564	IES-01318-r16	3042
supercont2.143	230455	232176	IES-01319-r8	1722
supercont2.143	234076	238447	IES-01320-r7	4372
supercont2.143	240882	241906	IES-01321-r4	1025
supercont2.143	247099	251826	IES-01322-r5	4728
supercont2.143	255775	258131	IES-01323-r3	2357
supercont2.143	267427	273736	IES-01324-r6	6310
supercont2.144	4291	6733	IES-01325-r10	2443
supercont2.144	7831	9413	IES-01326-r19	1583
supercont2.144	15580	31243	IES-01327-r10	15664
supercont2.144	35886	36473	IES-01328-r10	588
supercont2.144	40430	42789	IES-01329-r15	2360
supercont2.144	49690	52850	IES-01330-r16	3161
supercont2.144	58265	63027	IES-01331-r16	4763
supercont2.144	76418	84593	IES-01332-r8	8176
supercont2.144	94073	94642	IES-01333-r11	570
supercont2.144	100024	102040	IES-01334-r22	2017
supercont2.144	130482	130978	IES-01335-r14	497
supercont2.144	142057	143479	IES-01336-r13	1423
supercont2.144	155963	157583	IES-01337-r21	1621
supercont2.144	197456	199583	IES-01338-r18	2128
supercont2.144	255338	261812	IES-01339-r12	6475
supercont2.145	7661	27017	IES-01340-r14	19357
supercont2.145	39188	40352	IES-01341-r11	1165
supercont2.145	43631	46025	IES-01342-r12	2395
supercont2.145	71011	74480	IES-01343-r9	3470
supercont2.145	79666	82329	IES-01344-r13	2664
supercont2.145	86063	87794	IES-01345-r13	1732
supercont2.145	94417	94895	IES-01346-r11	479
supercont2.145	122080	124409	IES-01347-r12	2330
supercont2.145	131160	137523	IES-01348-r17	6364
supercont2.145	140043	142435	IES-01349-r13	2393
supercont2.145	150505	153895	IES-01350-r12	3391
supercont2.145	163418	164845	IES-01351-r14	1428
supercont2.145	169817	171004	IES-01352-r4	1188
supercont2.145	173784	177999	IES-01353-r7	4216
supercont2.145	192690	194634	IES-01356-r11	1945
supercont2.145	200121	203179	IES-01357-r10	3059
supercont2.145	232690	233958	IES-01358-r14	1269
supercont2.145	235962	236828	IES-01359-r15	867
supercont2.145	244074	248786	IES-01360-r12	4713
supercont2.145	259799	261378	IES-01361-r9	1580
supercont2.145	263342	264217	IES-01362-r7	876
supercont2.146	1319	5706	IES-01363-r10	4388
supercont2.146	22161	29158	IES-01364-r13	6998
supercont2.146	36787	41764	IES-01365-r14	4978
supercont2.146	48022	56474	IES-01366-r21	8453
supercont2.146	57746	64226	IES-01367-r23	6481
supercont2.146	70769	72938	IES-01368-r12	2170
supercont2.146	89208	93430	IES-01369-r11	4223
supercont2.146	106614	112477	IES-01371-r6	5864
supercont2.146	113605	117152	IES-01372-r5	3548
supercont2.146	128969	130310	IES-01373-r15	1342
supercont2.146	141962	143790	IES-01374-r13	1829
supercont2.146	147877	149408	IES-01375-r14	1532
supercont2.146	176092	178059	IES-01376-r16	1968
supercont2.146	179003	179855	IES-01377-r16	853
supercont2.146	184917	189823	IES-01378-r8	4907
supercont2.146	202137	210574	IES-01379-r21	8438
supercont2.146	226724	229518	IES-01380-r11	2795
supercont2.147	6248	10596	IES-01382-r8	4349
supercont2.147	23545	30848	IES-01383-r15	7304
supercont2.147	42829	48458	IES-01384-r7	5630
supercont2.147	50166	54211	IES-01385-r17	4046
supercont2.147	57469	61476	IES-01386-r13	4008
supercont2.147	67493	73057	IES-01387-r11	5565
supercont2.147	78362	85048	IES-01388-r14	6687
supercont2.147	89794	94667	IES-01389-r14	4874
supercont2.147	113336	115236	IES-01390-r7	1901
supercont2.147	121659	122628	IES-01391-r17	970
supercont2.147	128191	131920	IES-01392-r18	3730
supercont2.147	134407	136763	IES-01393-r10	2357
supercont2.147	139388	140794	IES-01394-r8	1407
supercont2.147	144187	145491	IES-01395-r7	1305
supercont2.147	153833	157033	IES-01396-r7	3201
supercont2.147	184521	187487	IES-01397-r7	2967
supercont2.147	201698	205957	IES-01398-r17	4260
supercont2.147	210526	213532	IES-01399-r13	3007
supercont2.147	222647	226384	IES-01400-r10	3738
supercont2.147	230304	232182	IES-01401-r11	1879
supercont2.147	242127	249001	IES-01402-r8	6875
supercont2.148	5483	10041	IES-01403-r11	4559
supercont2.148	12461	13566	IES-01404-r13	1106
supercont2.148	17583	18906	IES-01405-r11	1324
supercont2.148	22267	24502	IES-01406-r26	2236
supercont2.148	27577	34590	IES-01407-r17	7014
supercont2.148	60643	65619	IES-01408-r20	4977
supercont2.148	68158	70146	IES-01409-r19	1989
supercont2.148	72922	78060	IES-01410-r18	5139
supercont2.148	81352	82956	IES-01411-r18	1605
supercont2.148	96892	101147	IES-01412-r10	4256
supercont2.148	107089	113286	IES-01413-r17	6198
supercont2.148	114523	119663	IES-01414-r18	5141
supercont2.148	123353	126809	IES-01415-r15	3457
supercont2.148	143576	145270	IES-01416-r12	1695
supercont2.148	165734	167826	IES-01417-r19	2093
supercont2.148	178635	179533	IES-01418-r8	899
supercont2.148	180633	184433	IES-01419-r13	3801
supercont2.148	185243	187408	IES-01420-r15	2166
supercont2.148	221844	226151	IES-01421-r16	4308
supercont2.149	12829	16562	IES-01422-r12	3734
supercont2.149	30076	38756	IES-01423-r13	8681
supercont2.149	41283	51060	IES-01424-r5	9778
supercont2.149	68665	73720	IES-01425-r16	5056
supercont2.149	76242	80761	IES-01426-r13	4520
supercont2.149	81756	86173	IES-01427-r16	4418
supercont2.149	91014	98524	IES-01428-r9	7511
supercont2.149	116109	125294	IES-01429-r17	9186
supercont2.149	129884	140668	IES-01430-r10	10785
supercont2.149	143738	147747	IES-01431-r13	4010
supercont2.149	152254	156302	IES-01432-r11	4049
supercont2.149	173071	174774	IES-01433-r18	1704
supercont2.149	179857	184812	IES-01434-r11	4956
supercont2.149	189455	191156	IES-01435-r16	1702
supercont2.149	199692	201834	IES-01436-r14	2143
supercont2.149	221706	229614	IES-01437-r11	7909
supercont2.149	230827	233120	IES-01438-r9	2294
supercont2.149	237293	238375	IES-01439-r17	1083
supercont2.149	240086	244768	IES-01440-r15	4683
supercont2.15	5759	7507	IES-01441-r8	1749
supercont2.15	10420	13751	IES-01442-r12	3332
supercont2.15	22438	24821	IES-01443-r8	2384
supercont2.15	27545	31646	IES-01444-r14	4102
supercont2.15	33730	35201	IES-01445-r11	1472
supercont2.15	36643	40326	IES-01446-r9	3684
supercont2.15	62402	64309	IES-01447-r15	1908
supercont2.15	68133	70993	IES-01448-r18	2861
supercont2.15	79725	80341	IES-01449-r13	617
supercont2.15	83508	85790	IES-01450-r11	2283
supercont2.15	114014	120972	IES-01451-r24	6959
supercont2.15	126438	127460	IES-01452-r12	1023
supercont2.15	196964	209424	IES-01453-r31	12461
supercont2.15	217449	222239	IES-01454-r19	4791
supercont2.15	223460	239966	IES-01455-r10	16507
supercont2.15	294780	298111	IES-01456-r11	3332
supercont2.15	327780	328541	IES-01457-r18	762
supercont2.15	334535	336683	IES-01458-r15	2149
supercont2.15	353099	356681	IES-01459-r11	3583
supercont2.15	365432	368755	IES-01460-r15	3324
supercont2.15	374810	376070	IES-01461-r14	1261
supercont2.15	406298	407343	IES-01462-r12	1046
supercont2.15	428730	431783	IES-01463-r13	3054
supercont2.15	470696	473172	IES-01464-r8	2477
supercont2.15	481268	485117	IES-01465-r12	3850
supercont2.15	546589	551249	IES-01466-r12	4661
supercont2.15	556371	558952	IES-01467-r12	2582
supercont2.15	571451	574925	IES-01468-r19	3475
supercont2.15	611032	612172	IES-01469-r13	1141
supercont2.15	651519	655001	IES-01470-r14	3483
supercont2.15	665545	668598	IES-01471-r11	3054
supercont2.15	674503	676018	IES-01472-r14	1516
supercont2.15	693821	697064	IES-01473-r17	3244
supercont2.15	718923	722944	IES-01474-r14	4022
supercont2.15	790423	792391	IES-01475-r15	1969
supercont2.15	802863	804618	IES-01476-r19	1756
supercont2.15	893521	894978	IES-01477-r13	1458
supercont2.15	898174	899634	IES-01478-r17	1461
supercont2.15	935264	936628	IES-01479-r17	1365
supercont2.15	945509	946670	IES-01480-r16	1162
supercont2.15	990037	1000728	IES-01481-r13	10692
supercont2.15	1004034	1012832	IES-01482-r11	8799
supercont2.15	1016656	1023340	IES-01483-r8	6685
supercont2.15	1038146	1041319	IES-01484-r10	3174
supercont2.15	1105627	1106424	IES-01485-r18	798
supercont2.15	1118519	1125305	IES-01486-r6	6787
supercont2.15	1144070	1148608	IES-01487-r17	4539
supercont2.15	1194345	1195110	IES-01488-r20	766
supercont2.15	1249692	1251664	IES-01489-r15	1973
supercont2.15	1258250	1258830	IES-01490-r11	581
supercont2.15	1272880	1274205	IES-01491-r17	1326
supercont2.15	1303534	1304965	IES-01492-r20	1432
supercont2.15	1327728	1328624	IES-01493-r11	897
supercont2.15	1388026	1388848	IES-01494-r13	823
supercont2.15	1414433	1415313	IES-01495-r14	881
supercont2.15	1420876	1422194	IES-01496-r16	1319
supercont2.150	23118	25815	IES-01498-r16	2698
supercont2.150	87796	90800	IES-01499-r14	3005
supercont2.150	108981	111824	IES-01500-r10	2844
supercont2.150	130194	131884	IES-01501-r22	1691
supercont2.150	181742	183287	IES-01502-r14	1546
supercont2.150	210993	216594	IES-01503-r15	5602
supercont2.151	19866	27805	IES-01504-r13	7940
supercont2.151	30285	31905	IES-01505-r23	1621
supercont2.151	37958	38587	IES-01506-r13	630
supercont2.151	41436	62435	IES-01507-r7	21000
supercont2.151	69622	73249	IES-01508-r14	3628
supercont2.151	86816	91946	IES-01509-r12	5131
supercont2.151	93799	104657	IES-01510-r12	10859
supercont2.151	107503	111420	IES-01511-r11	3918
supercont2.151	148018	150756	IES-01512-r6	2739
supercont2.151	166491	170896	IES-01513-r9	4406
supercont2.151	176626	180025	IES-01514-r22	3400
supercont2.151	181850	183700	IES-01515-r24	1851
supercont2.151	187174	193119	IES-01516-r22	5946
supercont2.151	195004	196970	IES-01517-r21	1967
supercont2.151	198345	199575	IES-01518-r21	1231
supercont2.151	200613	203235	IES-01519-r14	2623
supercont2.151	214291	217348	IES-01520-r12	3058
supercont2.151	220075	224843	IES-01521-r11	4769
supercont2.151	228962	236869	IES-01522-r6	7908
supercont2.151	238038	240820	IES-01523-r7	2783
supercont2.152	17505	24604	IES-01524-r11	7100
supercont2.152	30476	32100	IES-01525-r11	1625
supercont2.152	82156	85356	IES-01526-r16	3201
supercont2.152	112025	113712	IES-01527-r5	1688
supercont2.152	142930	145623	IES-01528-r15	2694
supercont2.152	151467	153800	IES-01529-r10	2334
supercont2.152	157202	157771	IES-01530-r11	570
supercont2.152	170565	172322	IES-01531-r23	1758
supercont2.152	177683	181870	IES-01532-r11	4188
supercont2.152	202827	205860	IES-01533-r11	3034
supercont2.152	211944	217174	IES-01534-r10	5231
supercont2.152	220598	226253	IES-01535-r17	5656
supercont2.153	19509	24634	IES-01536-r9	5126
supercont2.153	27052	30121	IES-01537-r6	3070
supercont2.153	33426	37062	IES-01538-r4	3637
supercont2.153	55236	58568	IES-01539-r12	3333
supercont2.153	63076	65515	IES-01540-r9	2440
supercont2.153	70745	73630	IES-01541-r8	2886
supercont2.153	83435	96474	IES-01542-r17	13040
supercont2.153	101220	101475	IES-01543-r7	256
supercont2.153	102984	107913	IES-01544-r13	4930
supercont2.153	117925	120930	IES-01545-r13	3006
supercont2.153	125669	128092	IES-01546-r14	2424
supercont2.153	160173	173544	IES-01547-r13	13372
supercont2.153	186280	188647	IES-01548-r8	2368
supercont2.153	192118	193903	IES-01549-r11	1786
supercont2.153	207937	208428	IES-01550-r6	492
supercont2.153	226705	231642	IES-01551-r9	4938
supercont2.154	29669	30864	IES-01553-r8	1196
supercont2.154	75125	77103	IES-01554-r10	1979
supercont2.154	97679	105520	IES-01555-r7	7842
supercont2.154	106614	112906	IES-01556-r8	6293
supercont2.154	114589	124301	IES-01557-r6	9713
supercont2.154	139143	141569	IES-01558-r5	2427
supercont2.154	195485	198624	IES-01559-r7	3140
supercont2.154	210511	214154	IES-01560-r13	3644
supercont2.154	216166	234984	IES-01561-r10	18819
supercont2.154	239586	244569	IES-01562-r11	4984
supercont2.155	2505	9078	IES-01563-r13	6574
supercont2.155	12094	16058	IES-01564-r16	3965
supercont2.155	26179	29100	IES-01565-r13	2922
supercont2.155	30405	36640	IES-01566-r9	6236
supercont2.155	72782	73747	IES-01567-r15	966
supercont2.155	83484	96890	IES-01568-r17	13407
supercont2.155	99342	107676	IES-01569-r11	8335
supercont2.155	126931	132439	IES-01570-r11	5509
supercont2.155	134461	137283	IES-01571-r13	2823
supercont2.155	138575	141246	IES-01572-r23	2672
supercont2.155	143099	143665	IES-01573-r13	567
supercont2.155	145021	151885	IES-01574-r17	6865
supercont2.155	167552	183608	IES-01575-r8	16057
supercont2.155	184818	187426	IES-01576-r16	2609
supercont2.155	189607	195538	IES-01577-r6	5932
supercont2.155	196840	199218	IES-01578-r13	2379
supercont2.155	222675	224773	IES-01579-r11	2099
supercont2.155	228687	230910	IES-01580-r13	2224
supercont2.155	232479	235800	IES-01581-r12	3322
supercont2.155	243562	245172	IES-01582-r10	1611
supercont2.156	24199	34028	IES-01583-r4	9830
supercont2.156	85880	88083	IES-01584-r10	2204
supercont2.156	98502	105587	IES-01585-r19	7086
supercont2.156	132008	132828	IES-01586-r9	821
supercont2.156	134012	134589	IES-01587-r10	578
supercont2.156	161973	168019	IES-01588-r12	6047
supercont2.156	170829	172297	IES-01589-r10	1469
supercont2.156	174789	180191	IES-01590-r12	5403
supercont2.156	185941	187285	IES-01591-r10	1345
supercont2.156	190499	193234	IES-01592-r11	2736
supercont2.156	195925	198286	IES-01593-r7	2362
supercont2.156	201083	203720	IES-01594-r15	2638
supercont2.156	206460	212336	IES-01595-r7	5877
supercont2.156	213072	213524	IES-01596-r16	453
supercont2.156	215791	229393	IES-01597-r13	13603
supercont2.157	22270	34597	IES-01598-r7	12328
supercont2.157	37649	41431	IES-01599-r13	3783
supercont2.157	50692	54126	IES-01600-r11	3435
supercont2.157	58324	68218	IES-01601-r12	9895
supercont2.157	69355	77695	IES-01602-r6	8341
supercont2.157	81076	86803	IES-01603-r11	5728
supercont2.157	93493	97755	IES-01604-r13	4263
supercont2.157	108286	112176	IES-01605-r17	3891
supercont2.157	117408	120346	IES-01606-r18	2939
supercont2.157	127646	141953	IES-01607-r24	14308
supercont2.157	150505	155241	IES-01608-r12	4737
supercont2.157	163539	168316	IES-01609-r22	4778
supercont2.158	12257	19126	IES-01610-r10	6870
supercont2.158	23516	26072	IES-01611-r7	2557
supercont2.158	49750	50736	IES-01612-r23	987
supercont2.158	122140	125424	IES-01613-r18	3285
supercont2.158	167790	171831	IES-01614-r8	4042
supercont2.158	188187	191940	IES-01615-r12	3754
supercont2.158	199457	201498	IES-01616-r17	2042
supercont2.158	202416	205789	IES-01617-r8	3374
supercont2.158	207345	214065	IES-01618-r9	6721
supercont2.159	15458	21146	IES-01619-r15	5689
supercont2.159	29377	33133	IES-01620-r9	3757
supercont2.159	35774	38974	IES-01621-r19	3201
supercont2.159	41705	61823	IES-01622-r14	20119
supercont2.159	82931	93606	IES-01623-r8	10676
supercont2.159	111546	115139	IES-01624-r6	3594
supercont2.159	126489	140278	IES-01625-r10	13790
supercont2.159	143323	156869	IES-01626-r13	13547
supercont2.159	172948	176542	IES-01627-r14	3595
supercont2.159	177882	183964	IES-01628-r11	6083
supercont2.159	187828	189061	IES-01629-r5	1234
supercont2.159	191039	196502	IES-01630-r4	5464
supercont2.159	199230	204003	IES-01631-r5	4774
supercont2.159	206422	210715	IES-01632-r10	4294
supercont2.159	213577	215989	IES-01633-r14	2413
supercont2.159	218110	223752	IES-01634-r15	5643
supercont2.16	11104	12554	IES-01635-r11	1451
supercont2.16	15745	19034	IES-01636-r10	3290
supercont2.16	23718	26630	IES-01637-r16	2913
supercont2.16	53621	56419	IES-01638-r6	2799
supercont2.16	131661	133980	IES-01639-r14	2320
supercont2.16	142139	146295	IES-01640-r17	4157
supercont2.16	154194	156602	IES-01641-r17	2409
supercont2.16	159347	163398	IES-01642-r15	4052
supercont2.16	171418	172599	IES-01643-r10	1182
supercont2.16	193416	197478	IES-01644-r15	4063
supercont2.16	202841	205858	IES-01645-r9	3018
supercont2.16	209670	212722	IES-01646-r15	3053
supercont2.16	233758	235853	IES-01647-r15	2096
supercont2.16	252453	255063	IES-01648-r17	2611
supercont2.16	280456	287558	IES-01649-r22	7103
supercont2.16	342097	342884	IES-01650-r14	788
supercont2.16	347635	350271	IES-01651-r10	2637
supercont2.16	374234	380389	IES-01652-r10	6156
supercont2.16	386720	393654	IES-01653-r15	6935
supercont2.16	409162	418802	IES-01654-r10	9641
supercont2.16	489500	494430	IES-01655-r11	4931
supercont2.16	676443	677289	IES-01656-r12	847
supercont2.16	686973	689052	IES-01657-r14	2080
supercont2.16	713059	716198	IES-01658-r14	3140
supercont2.16	789099	795655	IES-01659-r17	6557
supercont2.16	797675	799494	IES-01660-r9	1820
supercont2.16	801571	818460	IES-01661-r19	16890
supercont2.16	820638	823823	IES-01662-r22	3186
supercont2.16	836776	838913	IES-01663-r6	2138
supercont2.16	861113	862806	IES-01664-r20	1694
supercont2.16	896987	897500	IES-01665-r14	514
supercont2.16	900580	902880	IES-01666-r12	2301
supercont2.16	906177	907248	IES-01667-r16	1072
supercont2.16	912226	914039	IES-01668-r20	1814
supercont2.16	917069	917748	IES-01669-r15	680
supercont2.16	939936	942655	IES-01670-r14	2720
supercont2.16	985103	988443	IES-01671-r18	3341
supercont2.16	1022813	1028269	IES-01672-r15	5457
supercont2.16	1030979	1045136	IES-01673-r18	14158
supercont2.16	1047515	1051451	IES-01674-r8	3937
supercont2.16	1052429	1054731	IES-01675-r10	2303
supercont2.16	1186744	1189451	IES-01676-r16	2708
supercont2.16	1245060	1249306	IES-01677-r14	4247
supercont2.16	1265270	1266710	IES-01678-r18	1441
supercont2.16	1277340	1280549	IES-01679-r9	3210
supercont2.16	1283425	1285134	IES-01680-r13	1710
supercont2.16	1286606	1288104	IES-01681-r10	1499
supercont2.16	1319813	1322445	IES-01682-r14	2633
supercont2.160	49161	52851	IES-01683-r11	3691
supercont2.160	57434	63551	IES-01684-r8	6118
supercont2.160	65991	69018	IES-01685-r12	3028
supercont2.160	70754	73203	IES-01686-r17	2450
supercont2.160	74744	76996	IES-01687-r5	2253
supercont2.160	84543	85941	IES-01688-r21	1399
supercont2.160	88064	90835	IES-01689-r21	2772
supercont2.160	93106	96914	IES-01690-r22	3809
supercont2.160	100952	106841	IES-01691-r17	5890
supercont2.160	110980	112651	IES-01692-r6	1672
supercont2.160	117486	121904	IES-01693-r8	4419
supercont2.160	122910	123762	IES-01694-r14	853
supercont2.160	130629	136994	IES-01695-r5	6366
supercont2.160	151495	160823	IES-01696-r16	9329
supercont2.160	163992	165768	IES-01697-r10	1777
supercont2.160	171190	173599	IES-01698-r6	2410
supercont2.160	174916	176947	IES-01699-r4	2032
supercont2.160	180520	183092	IES-01700-r15	2573
supercont2.160	184300	191450	IES-01701-r8	7151
supercont2.160	192446	196791	IES-01702-r6	4346
supercont2.160	223153	226475	IES-01703-r10	3323
supercont2.161	7993	12788	IES-01704-r19	4796
supercont2.161	14765	18226	IES-01705-r20	3462
supercont2.161	19854	24656	IES-01706-r17	4803
supercont2.161	37121	55525	IES-01707-r7	18405
supercont2.161	61308	72530	IES-01708-r11	11223
supercont2.161	74057	77342	IES-01709-r11	3286
supercont2.161	85486	89211	IES-01710-r15	3726
supercont2.161	101547	104562	IES-01711-r18	3016
supercont2.161	114181	116219	IES-01712-r22	2039
supercont2.161	119800	122840	IES-01713-r16	3041
supercont2.161	166656	169128	IES-01714-r16	2473
supercont2.161	172481	174878	IES-01715-r10	2398
supercont2.161	177012	179126	IES-01716-r4	2115
supercont2.161	208069	209049	IES-01717-r17	981
supercont2.161	215139	221744	IES-01718-r23	6606
supercont2.162	8439	11041	IES-01719-r6	2603
supercont2.162	32689	33320	IES-01720-r19	632
supercont2.162	43027	46344	IES-01721-r11	3318
supercont2.162	57889	61218	IES-01722-r17	3330
supercont2.162	64503	65686	IES-01723-r15	1184
supercont2.162	67610	69100	IES-01724-r12	1491
supercont2.162	111464	112366	IES-01725-r9	903
supercont2.162	127971	131163	IES-01726-r13	3193
supercont2.162	134456	138961	IES-01727-r14	4506
supercont2.162	149279	150636	IES-01728-r21	1358
supercont2.162	160607	161568	IES-01729-r16	962
supercont2.162	178937	181518	IES-01730-r15	2582
supercont2.162	196197	197475	IES-01731-r7	1279
supercont2.162	210662	214276	IES-01732-r17	3615
supercont2.163	10601	20690	IES-01733-r12	10090
supercont2.163	27672	30104	IES-01734-r14	2433
supercont2.163	43993	44899	IES-01735-r8	907
supercont2.163	49955	51448	IES-01736-r10	1494
supercont2.163	58708	63504	IES-01737-r18	4797
supercont2.163	67839	68816	IES-01738-r15	978
supercont2.163	82843	83486	IES-01739-r16	644
supercont2.163	95266	125374	IES-01740-r11	30109
supercont2.163	136672	140428	IES-01741-r15	3757
supercont2.163	153105	157836	IES-01742-r12	4732
supercont2.163	166360	166755	IES-01743-r14	396
supercont2.163	170688	176643	IES-01744-r10	5956
supercont2.163	180410	180995	IES-01745-r9	586
supercont2.163	207157	209606	IES-01746-r12	2450
supercont2.163	222482	223238	IES-01747-r8	757
supercont2.164	17403	19839	IES-01748-r13	2437
supercont2.164	97789	102380	IES-01750-r5	4592
supercont2.164	114319	115477	IES-01751-r5	1159
supercont2.164	117212	126258	IES-01752-r7	9047
supercont2.164	141674	144319	IES-01754-r7	2646
supercont2.164	146088	147947	IES-01755-r13	1860
supercont2.164	148805	153622	IES-01756-r7	4818
supercont2.164	158874	168676	IES-01757-r7	9803
supercont2.164	178736	182354	IES-01758-r6	3619
supercont2.164	184016	189002	IES-01759-r14	4987
supercont2.164	195641	197419	IES-01760-r7	1779
supercont2.164	198495	216809	IES-01761-r5	18315
supercont2.165	18738	30726	IES-01762-r14	11989
supercont2.165	33931	39058	IES-01763-r16	5128
supercont2.165	40553	42192	IES-01764-r20	1640
supercont2.165	43431	49857	IES-01765-r20	6427
supercont2.165	53004	60915	IES-01766-r12	7912
supercont2.165	63832	75067	IES-01767-r14	11236
supercont2.165	83649	85924	IES-01768-r9	2276
supercont2.165	99278	99975	IES-01769-r14	698
supercont2.165	107436	109196	IES-01770-r13	1761
supercont2.165	121809	125675	IES-01771-r15	3867
supercont2.165	135624	140353	IES-01772-r8	4730
supercont2.165	143094	143737	IES-01773-r8	644
supercont2.165	177182	178059	IES-01774-r12	878
supercont2.165	211067	216865	IES-01775-r13	5799
supercont2.166	8943	14178	IES-01776-r5	5236
supercont2.166	52468	53879	IES-01777-r13	1412
supercont2.166	57868	59042	IES-01778-r11	1175
supercont2.166	63256	67459	IES-01779-r18	4204
supercont2.166	69246	71028	IES-01780-r13	1783
supercont2.166	103808	107350	IES-01781-r15	3543
supercont2.166	109967	111472	IES-01782-r14	1506
supercont2.166	132829	138904	IES-01783-r19	6076
supercont2.166	150317	155579	IES-01784-r14	5263
supercont2.166	158966	160566	IES-01785-r17	1601
supercont2.166	168173	169485	IES-01786-r15	1313
supercont2.166	179985	181039	IES-01787-r17	1055
supercont2.166	186339	187627	IES-01788-r12	1289
supercont2.166	190587	194504	IES-01789-r13	3918
supercont2.166	202347	206951	IES-01790-r14	4605
supercont2.166	209181	212024	IES-01791-r9	2844
supercont2.166	213456	219645	IES-01792-r12	6190
supercont2.167	4252	6667	IES-01793-r12	2416
supercont2.167	13277	15526	IES-01794-r17	2250
supercont2.167	23372	24287	IES-01795-r14	916
supercont2.167	34411	36859	IES-01796-r16	2449
supercont2.167	90164	92167	IES-01797-r19	2004
supercont2.167	97627	99093	IES-01798-r12	1467
supercont2.167	128281	130325	IES-01799-r6	2045
supercont2.167	135801	136173	IES-01800-r7	373
supercont2.167	169072	171540	IES-01801-r13	2469
supercont2.167	176409	185023	IES-01802-r18	8615
supercont2.167	207716	215104	IES-01803-r12	7389
supercont2.168	70186	74126	IES-01804-r16	3941
supercont2.168	93876	94639	IES-01805-r17	764
supercont2.168	125470	126481	IES-01806-r11	1012
supercont2.168	132885	135057	IES-01807-r14	2173
supercont2.168	146196	149146	IES-01808-r10	2951
supercont2.168	150577	154102	IES-01809-r6	3526
supercont2.168	176063	177294	IES-01810-r3	1232
supercont2.168	186891	189405	IES-01811-r13	2515
supercont2.168	194720	198566	IES-01812-r6	3847
supercont2.168	200554	208821	IES-01813-r18	8268
supercont2.169	21166	24599	IES-01814-r10	3434
supercont2.169	60539	62708	IES-01815-r7	2170
supercont2.169	65465	68148	IES-01816-r19	2684
supercont2.169	71418	73220	IES-01817-r10	1803
supercont2.169	91338	92598	IES-01818-r8	1261
supercont2.169	124929	126348	IES-01819-r14	1420
supercont2.169	127530	147391	IES-01820-r12	19862
supercont2.169	148218	153759	IES-01821-r6	5542
supercont2.169	154486	197914	IES-01822-r8	43429
supercont2.17	14235	24304	IES-01823-r19	10070
supercont2.17	63408	66424	IES-01824-r23	3017
supercont2.17	82665	84061	IES-01825-r13	1397
supercont2.17	97946	100917	IES-01826-r9	2972
supercont2.17	126960	129787	IES-01827-r20	2828
supercont2.17	141282	142869	IES-01828-r17	1588
supercont2.17	194477	195378	IES-01829-r17	902
supercont2.17	284871	285505	IES-01830-r12	635
supercont2.17	297331	299064	IES-01831-r13	1734
supercont2.17	397608	398056	IES-01832-r21	449
supercont2.17	426107	429216	IES-01833-r13	3110
supercont2.17	484791	485853	IES-01834-r9	1063
supercont2.17	488611	490579	IES-01835-r11	1969
supercont2.17	520653	521363	IES-01836-r12	711
supercont2.17	533237	534638	IES-01837-r11	1402
supercont2.17	546657	547685	IES-01838-r11	1029
supercont2.17	559563	561282	IES-01839-r16	1720
supercont2.17	580222	584263	IES-01840-r10	4042
supercont2.17	592768	594041	IES-01841-r17	1274
supercont2.17	662950	664411	IES-01842-r16	1462
supercont2.17	677563	679704	IES-01843-r11	2142
supercont2.17	681556	683632	IES-01844-r9	2077
supercont2.17	708954	711142	IES-01845-r14	2189
supercont2.17	725757	744134	IES-01846-r11	18378
supercont2.17	746489	762541	IES-01847-r11	16053
supercont2.17	765302	768164	IES-01848-r9	2863
supercont2.17	771060	778077	IES-01849-r9	7018
supercont2.17	780918	786545	IES-01850-r16	5628
supercont2.17	799582	801827	IES-01851-r15	2246
supercont2.17	807391	811009	IES-01852-r8	3619
supercont2.17	833565	835971	IES-01853-r20	2407
supercont2.17	1024054	1025205	IES-01854-r15	1152
supercont2.17	1058954	1061149	IES-01855-r15	2196
supercont2.17	1096206	1097290	IES-01856-r10	1085
supercont2.17	1103098	1108781	IES-01857-r10	5684
supercont2.17	1182001	1182524	IES-01858-r15	524
supercont2.17	1271972	1272831	IES-01859-r12	860
supercont2.17	1281330	1281461	IES-01860-r5	132
supercont2.17	1288733	1290156	IES-01861-r20	1424
supercont2.17	1306545	1308010	IES-01862-r12	1466
supercont2.17	1310676	1311365	IES-01863-r16	690
supercont2.170	31154	35904	IES-01866-r9	4751
supercont2.170	37745	55479	IES-01867-r15	17735
supercont2.170	56628	60120	IES-01868-r8	3493
supercont2.170	62800	67294	IES-01869-r7	4495
supercont2.170	80488	81762	IES-01870-r19	1275
supercont2.170	94367	95687	IES-01871-r18	1321
supercont2.170	100226	103823	IES-01872-r21	3598
supercont2.170	115192	116263	IES-01873-r8	1072
supercont2.170	117648	122305	IES-01874-r8	4658
supercont2.170	153638	159018	IES-01876-r17	5381
supercont2.170	179542	182148	IES-01877-r13	2607
supercont2.170	184552	185575	IES-01878-r11	1024
supercont2.170	199220	208430	IES-01879-r9	9211
supercont2.171	6171	8188	IES-01880-r17	2018
supercont2.171	11467	15614	IES-01881-r18	4148
supercont2.171	19467	20447	IES-01882-r18	981
supercont2.171	23592	25016	IES-01883-r9	1425
supercont2.171	42191	44076	IES-01884-r15	1886
supercont2.171	48563	51488	IES-01885-r11	2926
supercont2.171	54887	56066	IES-01886-r15	1180
supercont2.171	62792	64510	IES-01887-r16	1719
supercont2.171	142232	144118	IES-01888-r20	1887
supercont2.171	149530	152769	IES-01889-r15	3240
supercont2.171	156160	161242	IES-01890-r8	5083
supercont2.171	162605	167310	IES-01891-r15	4706
supercont2.171	169360	173358	IES-01892-r9	3999
supercont2.171	176022	180608	IES-01893-r11	4587
supercont2.171	183051	187924	IES-01894-r15	4874
supercont2.172	18917	22584	IES-01895-r11	3668
supercont2.172	31639	34128	IES-01896-r16	2490
supercont2.172	36765	39040	IES-01897-r13	2276
supercont2.172	40900	44075	IES-01898-r12	3176
supercont2.172	46870	54351	IES-01899-r14	7482
supercont2.172	55619	70095	IES-01900-r10	14477
supercont2.172	81077	86827	IES-01901-r13	5751
supercont2.172	90656	96888	IES-01902-r14	6233
supercont2.172	103876	110550	IES-01903-r13	6675
supercont2.172	117484	118622	IES-01904-r15	1139
supercont2.172	141871	149820	IES-01905-r10	7950
supercont2.172	158135	162832	IES-01906-r11	4698
supercont2.172	164306	170199	IES-01907-r15	5894
supercont2.172	191549	198386	IES-01908-r12	6838
supercont2.172	200873	206969	IES-01909-r5	6097
supercont2.173	24052	24681	IES-01910-r10	630
supercont2.173	25846	53403	IES-01911-r11	27558
supercont2.173	58009	77757	IES-01912-r6	19749
supercont2.173	84328	91843	IES-01913-r15	7516
supercont2.173	92862	95606	IES-01914-r8	2745
supercont2.173	98212	109387	IES-01915-r9	11176
supercont2.173	118897	123519	IES-01916-r8	4623
supercont2.173	127149	141924	IES-01917-r4	14776
supercont2.173	143449	146803	IES-01918-r10	3355
supercont2.173	147679	159577	IES-01919-r10	11899
supercont2.173	163615	172039	IES-01920-r10	8425
supercont2.173	174569	183366	IES-01921-r15	8798
supercont2.173	187826	197619	IES-01922-r17	9794
supercont2.173	202544	206665	IES-01923-r12	4122
supercont2.174	10298	15299	IES-01924-r13	5002
supercont2.174	26174	30594	IES-01925-r15	4421
supercont2.174	40683	49055	IES-01926-r9	8373
supercont2.174	52106	68564	IES-01927-r13	16459
supercont2.174	70595	78519	IES-01928-r12	7925
supercont2.174	107176	109662	IES-01929-r15	2487
supercont2.174	111391	116070	IES-01930-r10	4680
supercont2.174	117337	122342	IES-01931-r11	5006
supercont2.174	129876	130105	IES-01932-r10	230
supercont2.174	157543	160913	IES-01933-r7	3371
supercont2.174	163058	166495	IES-01934-r12	3438
supercont2.174	169280	170994	IES-01935-r10	1715
supercont2.174	175822	177225	IES-01936-r7	1404
supercont2.174	187971	189365	IES-01937-r15	1395
supercont2.174	193342	194360	IES-01938-r8	1019
supercont2.175	9652	11179	IES-01940-r6	1528
supercont2.175	12134	13620	IES-01941-r7	1487
supercont2.175	14424	21864	IES-01942-r11	7441
supercont2.175	24992	27041	IES-01943-r8	2050
supercont2.175	37667	42740	IES-01944-r10	5074
supercont2.175	45973	54619	IES-01945-r12	8647
supercont2.175	64643	67323	IES-01946-r5	2681
supercont2.175	70625	73362	IES-01947-r9	2738
supercont2.175	79976	83695	IES-01948-r10	3720
supercont2.175	93028	98132	IES-01949-r6	5105
supercont2.175	103268	105619	IES-01950-r18	2352
supercont2.175	109745	113280	IES-01951-r11	3536
supercont2.175	118019	119757	IES-01952-r9	1739
supercont2.175	121035	123833	IES-01953-r13	2799
supercont2.175	125907	128795	IES-01954-r7	2889
supercont2.175	130257	132078	IES-01955-r13	1822
supercont2.175	139272	141516	IES-01956-r11	2245
supercont2.175	181581	189886	IES-01957-r7	8306
supercont2.176	20551	22667	IES-01959-r12	2117
supercont2.176	41472	43794	IES-01960-r16	2323
supercont2.176	47322	52389	IES-01961-r12	5068
supercont2.176	58956	63851	IES-01962-r5	4896
supercont2.176	85008	89071	IES-01963-r12	4064
supercont2.176	94689	95690	IES-01964-r9	1002
supercont2.176	111033	112927	IES-01965-r16	1895
supercont2.176	129370	134743	IES-01966-r16	5374
supercont2.176	141698	143268	IES-01967-r6	1571
supercont2.176	152881	154405	IES-01968-r6	1525
supercont2.176	175740	179063	IES-01969-r10	3324
supercont2.176	184126	186160	IES-01970-r10	2035
supercont2.177	54029	58392	IES-01971-r11	4364
supercont2.177	62480	65641	IES-01972-r10	3162
supercont2.177	112066	114792	IES-01973-r24	2727
supercont2.177	119265	122846	IES-01974-r17	3582
supercont2.177	127651	132120	IES-01975-r12	4470
supercont2.177	155741	159379	IES-01976-r10	3639
supercont2.177	173558	177525	IES-01977-r14	3968
supercont2.177	181660	183391	IES-01978-r13	1732
supercont2.177	184384	194811	IES-01979-r21	10428
supercont2.177	198512	200196	IES-01980-r16	1685
supercont2.178	11510	13498	IES-01981-r10	1989
supercont2.178	14710	18970	IES-01982-r15	4261
supercont2.178	22423	26759	IES-01983-r14	4337
supercont2.178	41483	45469	IES-01984-r8	3987
supercont2.178	47763	50950	IES-01985-r12	3188
supercont2.178	63900	65967	IES-01986-r19	2068
supercont2.178	81290	85141	IES-01987-r10	3852
supercont2.178	90004	91368	IES-01988-r15	1365
supercont2.178	93478	98049	IES-01989-r12	4572
supercont2.178	132109	140003	IES-01990-r23	7895
supercont2.178	144071	147794	IES-01991-r14	3724
supercont2.178	151921	155046	IES-01992-r15	3126
supercont2.179	42497	44367	IES-01993-r12	1871
supercont2.179	76255	82039	IES-01994-r14	5785
supercont2.179	96128	98070	IES-01995-r11	1943
supercont2.179	134101	139718	IES-01996-r21	5618
supercont2.179	149014	151362	IES-01997-r19	2349
supercont2.179	156453	160850	IES-01998-r16	4398
supercont2.179	175945	176497	IES-01999-r10	553
supercont2.179	181185	185012	IES-02000-r17	3828
supercont2.179	188550	191110	IES-02001-r11	2561
supercont2.18	40719	48341	IES-02002-r20	7623
supercont2.18	67929	71756	IES-02003-r12	3828
supercont2.18	82605	88470	IES-02004-r12	5866
supercont2.18	89370	96793	IES-02005-r9	7424
supercont2.18	101442	106418	IES-02006-r14	4977
supercont2.18	109307	111236	IES-02007-r11	1930
supercont2.18	120002	121663	IES-02008-r18	1662
supercont2.18	165844	167124	IES-02009-r12	1281
supercont2.18	178544	180732	IES-02010-r18	2189
supercont2.18	183790	185333	IES-02011-r15	1544
supercont2.18	190990	192390	IES-02012-r9	1401
supercont2.18	194332	196866	IES-02013-r15	2535
supercont2.18	200353	201305	IES-02014-r13	953
supercont2.18	218068	218937	IES-02015-r13	870
supercont2.18	223435	225385	IES-02016-r19	1951
supercont2.18	230187	232012	IES-02017-r7	1826
supercont2.18	257876	258906	IES-02018-r12	1031
supercont2.18	269525	271197	IES-02019-r14	1673
supercont2.18	280859	283559	IES-02020-r10	2701
supercont2.18	301673	304336	IES-02021-r16	2664
supercont2.18	321831	324368	IES-02022-r12	2538
supercont2.18	344405	346442	IES-02023-r3	2038
supercont2.18	368405	370908	IES-02024-r21	2504
supercont2.18	378435	382179	IES-02025-r17	3745
supercont2.18	390582	393898	IES-02026-r11	3317
supercont2.18	402116	411080	IES-02027-r17	8965
supercont2.18	430393	436756	IES-02028-r17	6364
supercont2.18	446733	448426	IES-02029-r13	1694
supercont2.18	460313	465113	IES-02030-r12	4801
supercont2.18	472569	478896	IES-02031-r9	6328
[truncated: 5,555 more rows]

## Sheet: Supplementary File 3B
Supplementary File 3B. Summary of the putative TE content in IESs
IES subset	Size distribution	IESs with putative TEs
		Number (percentage)	Range of TE content	Median	Average
All (7551 high confidence)	136 bp to 43.4 kb	6702 (88.7 %)	1 to 100 %	0.357	0.377
50 longest	19.9 to 43.4 kb	50 (100 %)	14.1 to 67.7 %	0.41	0.39
50 shortest	136 bp to ~303 bp	6 (12 %)	20.7 to 72.6 %	0.5	0.504
50 shortest IESs that contain putative TEs	234 bp to ~497 bp	50 (100 %)	12.6 to 100 %	0.695	0.633

## Sheet: Supplementary File 3C
Supplementary File 3C
Interspersed repeat (putative TEs) content
	MAC	MIC	High confidence set of 7551 IESs
Total assembly size (Mb)	103.002	157.693	28.5682
Assembly size minus gaps (Mb)	102.939	147.645	26.0987
Total interspersed repeats content
in Mb	0.995881	18.6602	10.8711
in percentage of assembly size minus gaps	0.967452	12.6386	41.6537
Classification of interspersed repeats (Length in Mb)
DNA	0.310658	9.08147	4.9823
nonLTR/LINE	0.007071	0.511115	0.326482
nonLTR/Others	0.025948	0.375775	0.180853
Unclassified	0.652204	8.69187	5.38145
Classification of interspersed repeats (Percentage of genome minus gaps)
DNA	0.30179	6.15088	19.0902
nonLTR/LINE	0.00686915	0.346178	1.25095
nonLTR/Others	0.0252073	0.254513	0.692957
Unclassified	0.633586	5.88701	20.6196
Relative percentage of each class (100% = the total of interspersed repeats)
DNA	31.1943	48.6675	45.8307
nonLTR/LINE	0.710025	2.73906	3.00321
nonLTR/Others	2.60553	2.01377	1.66361
Unclassified	65.4902	46.5797	49.5024
Relative percentage of each class (100% = the total of classified TEs)
DNA	90.3924	91.1029	90.7583
nonLTR/LINE	2.05746	5.12737	5.94725
nonLTR/Others	7.55011	3.76968	3.29445
Sub-classification of DNA TEs by superfamilies (Length in Mb)
DNA/Tlr-Maverick	1.91198	2.82294	1.36106
DNA/TcMar	0.144328	4.43588	2.62882
DNA/hAT	0.001547	0.151885	0.085725
DNA/Others	0.027443	0.74193	0.455673
DNA/DNA	0.101069	1.08267	0.464022
Sub-classification of DNA TEs by superfamilies (Percentage of genome minus gaps)
DNA/Tlr-Maverick	1.8574	1.91198	5.21503
DNA/TcMar	0.140208	3.00442	10.0726
DNA/hAT	0.00150284	0.102872	0.328464
DNA/Others	0.0266596	0.50251	1.74596
DNA/DNA	0.0981839	0.733291	1.77795
Relative percentage of each superfamily (100% = the total of DNA TEs)
DNA/Tlr-Maverick	87.4501	30.5669	27.2468
DNA/TcMar	6.60126	48.0317	52.6259
DNA/hAT	0.0707566	1.64461	1.71611
DNA/Others	1.25519	8.03363	9.12203
DNA/DNA	4.62269	11.7231	9.28917

## Sheet: Supplementary File 3D
Supplementary File 3D. Characteristics of IESs within protein-coding regions
MIC supercontig	IES begina	IES enda	IES length	Excision Variability	Junction	Junction Repeat Sequence	Genic Location	IES within Gene	Previous IDc
supercont2.17	1281326	1281461	136	precise	direct repeat and TIR	TTAACRCTTC	exon	TTHERM_00420400
supercont2.105	178349	178536	188	precise	direct repeat and TIR	TTAACACTT	exon	TTHERM_00464970
supercont2.3	2412253	2412446	194	precise	direct repeat and TIR	TTAACWCTTT	exon	TTHERM_00142380	IES 1
supercont2.473	29036	29236	201	micro-variable	direct repeat	TAA/TTA	intergenic
supercont2.86	151753	151958	205	micro-variable	direct repeat	T/A	intron
supercont2.66	310965	311179	215	micro-variable	direct repeat	ATTT/AAAT	intergenic
supercont2.19	458118	458331	214	micro-variable	direct repeat	AA/TT	intergenic
supercont2.49	28721	28937	216	micro-variable	no overlap	n/a	intron
supercont2.42	517591	517811	220	micro-variable	no overlap	n/a	intergenic
supercont2.422	5935	6163	228	micro-variable	no overlap	n/a	intergenic
supercont2.1	1200561	1200793	233	micro-variable	direct repeat	AT	intergenic
supercont2.3	1402663	1402898	236	micro-variable	direct repeat	TTT/AAA	intergenic
supercont2.174	129875	130109	234	micro-variable	no overlap	n/a	intergenic
supercont2.5	58643	58879	236	micro-variable	no overlap	n/a	intergenic
supercont2.35	119352b	119535b	327	precise	direct repeat and TIR	TTAACACTWT	exon	TTHERM_00569290	IES 2
supercont2.17	394341b	395024b	384	precise	direct repeat and TIR	TTAACACTTWCT	exon	TTHERM_00348490
supercont2.17	397604	398056	453	precise	direct repeat and TIR	TTAACMCTTTA	exon	TTHERM_00348490	IES B
aCoordinates confirmed by PCR using flanking primers.
bThese coordinates correspond to the beginnings and ends of MIC assembly gaps. Actual sequence of the 327 bp IES from Fass et al. (2011). Sequence of the 384 bp IES determined from a cloned PCR product.
cAs in Fass et al. (2011)
